# Supplementary material for: The role of stereochemistry in the anticancer activity of Re(i) tricarbonyl complexes
Source: Royal Society of Chemistry journal article supplement (doi:10.1039/d4dt01643b), 2024-01-01
Supplement: d4dt01643b1.pdf [file d4dt01643b1.pdf]

## Electronic Supplementary Information

### The role of stereochemistry in the anticancer activity of Re(I) tricarbonyl complexes

Atena B. Solea<sup>1,\*</sup>, Gozde Demirci<sup>2</sup>, Freya M. Harvey<sup>1</sup>, Aurelien Crochet<sup>2</sup>, Fabio Zobi<sup>2,\*</sup>, Olimpia Mamula Steiner<sup>1,\*</sup>

<sup>1</sup>University of Applied Sciences of Western Switzerland, HES-SO, HEIA-FR, Pérolles 80, CH-1705 Fribourg, Switzerland

<sup>2</sup>University of Fribourg, Department of Chemistry, Chemin du Musée 9, CH-1700 Fribourg, Switzerland

|                                                                |           |
|----------------------------------------------------------------|-----------|
| <b>Analytical data</b> .....                                   | <b>2</b>  |
| <sup>1</sup> H and <sup>13</sup> C NMR spectra .....           | 2         |
| HRMS spectra .....                                             | 17        |
| IR spectra .....                                               | 27        |
| CD spectra .....                                               | 31        |
| Photophysical characterisation .....                           | 32        |
| <b>Docking calculations</b> .....                              | <b>36</b> |
| <b>Biological data</b> .....                                   | <b>37</b> |
| <b>ICP-MS measurements</b> .....                               | <b>37</b> |
| <b>Crystallographic data</b> .....                             | <b>38</b> |
| Inter-and intramolecular interactions in the solid state ..... | 38        |
| X-Ray tables .....                                             | 42        |

# Analytical data

## $^1\text{H}$ and $^{13}\text{C}$ NMR spectra

### Spectra of the ligands

#### 5b

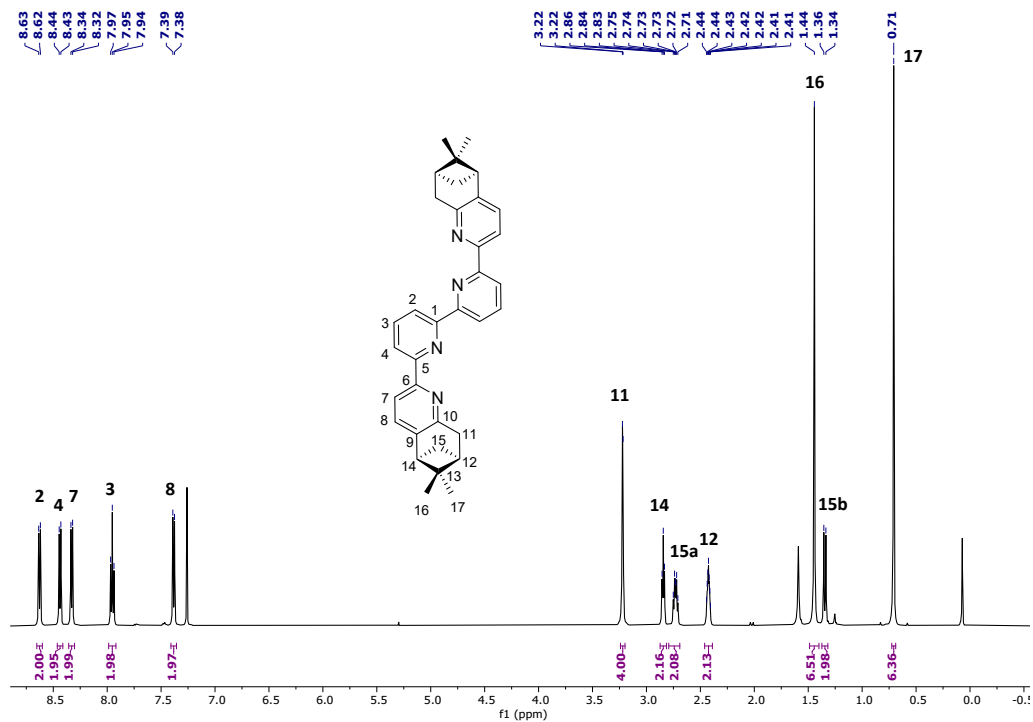

Figure S1.  $^1\text{H}$ -NMR spectrum of **5b** in  $\text{CDCl}_3$

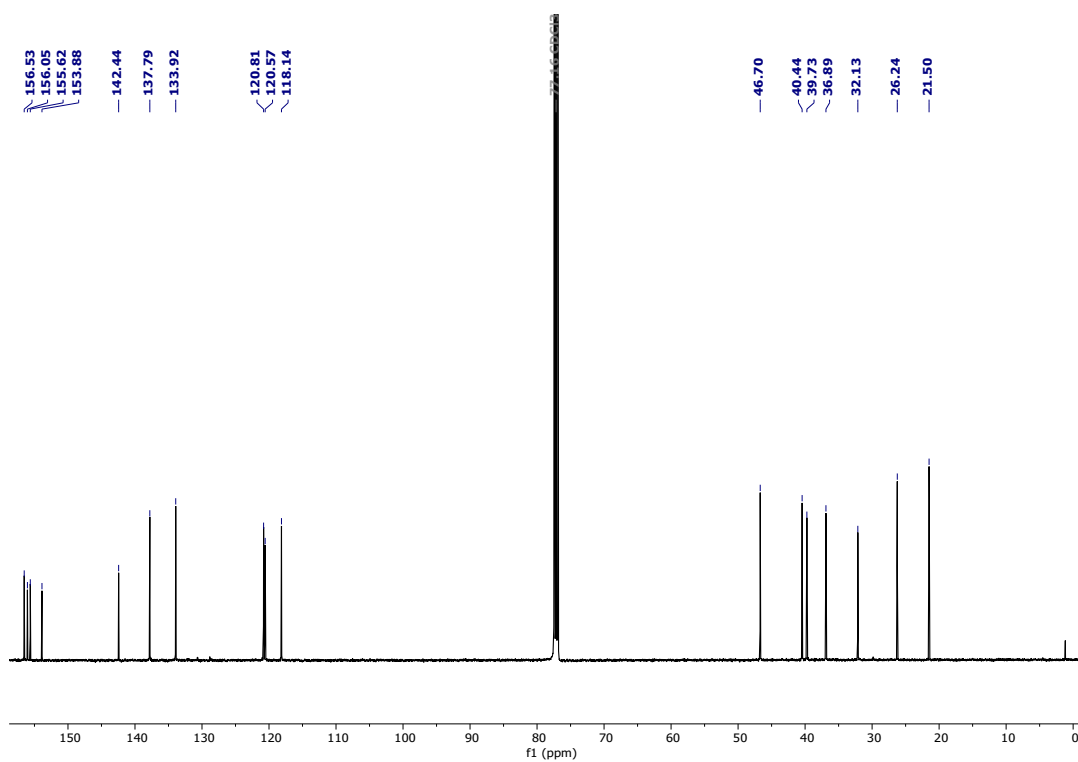

Figure S2.  $^{13}\text{C}$ -NMR spectrum of **5b** in  $\text{CDCl}_3$

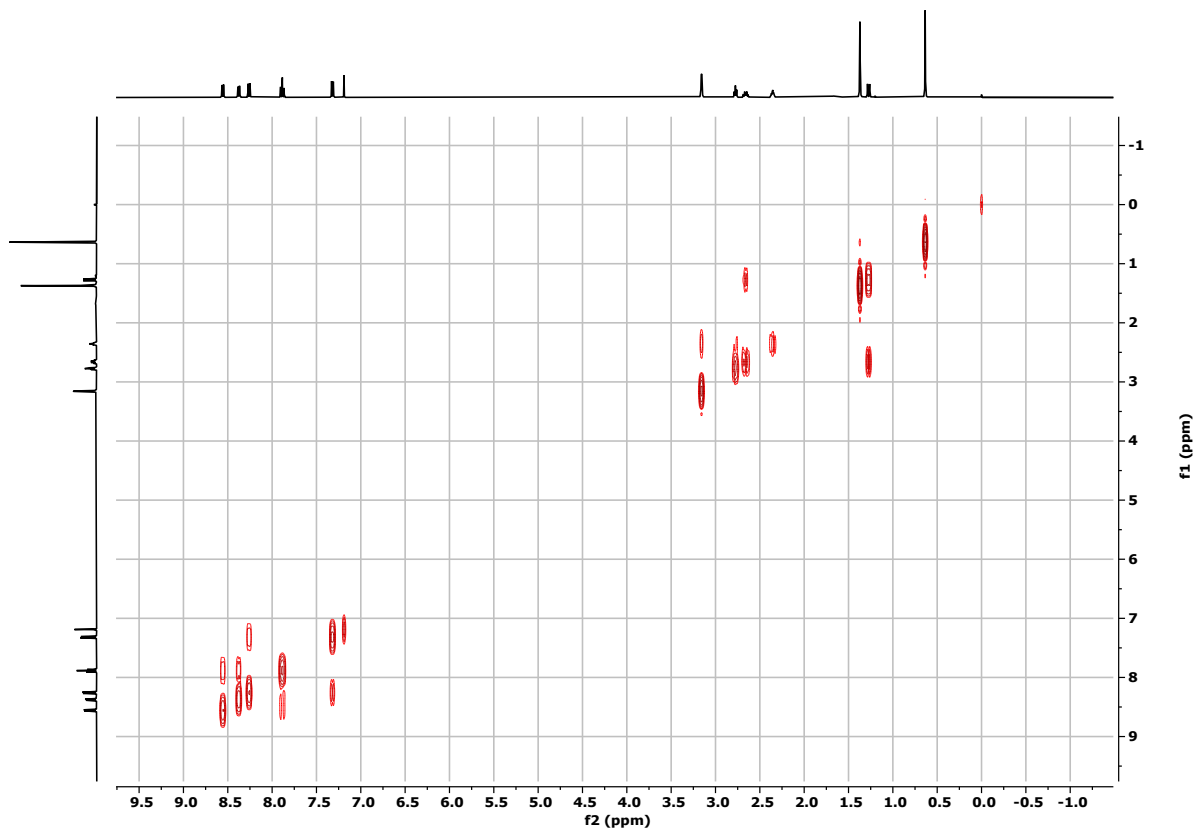

Figure S3. COSY spectrum of **5b** in  $CDCl_3$

6a

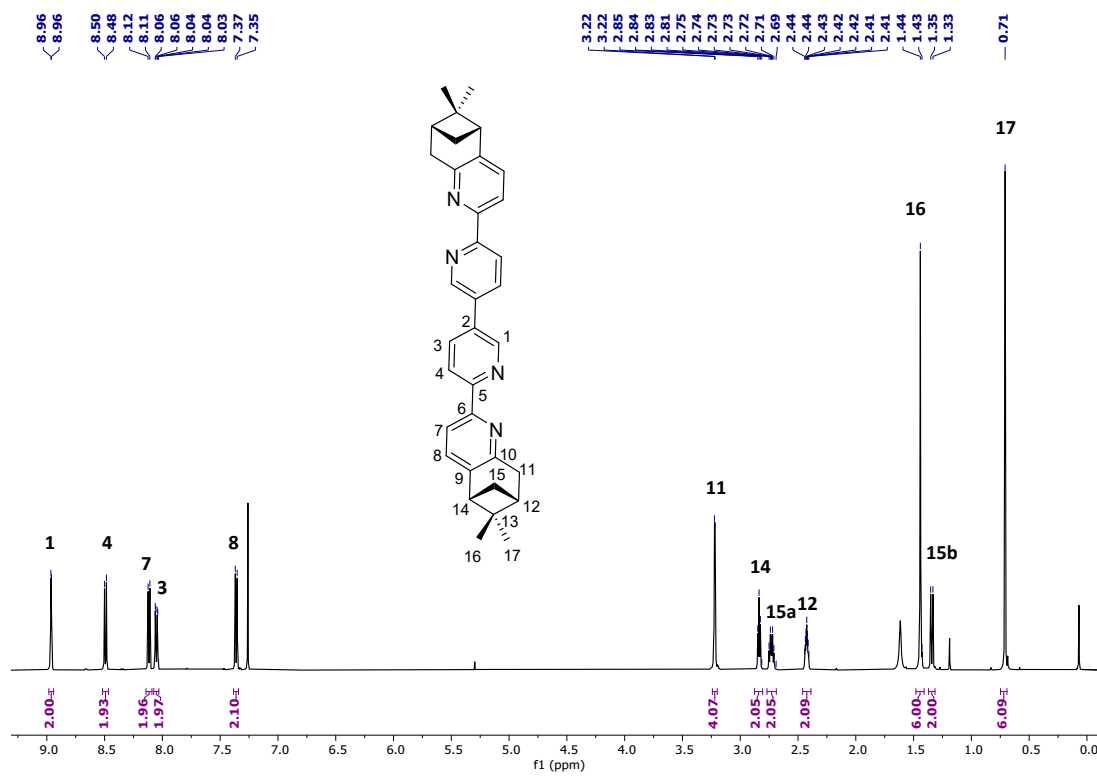

Figure S4.  $^1H$ -NMR spectrum of **6a** in  $CDCl_3$

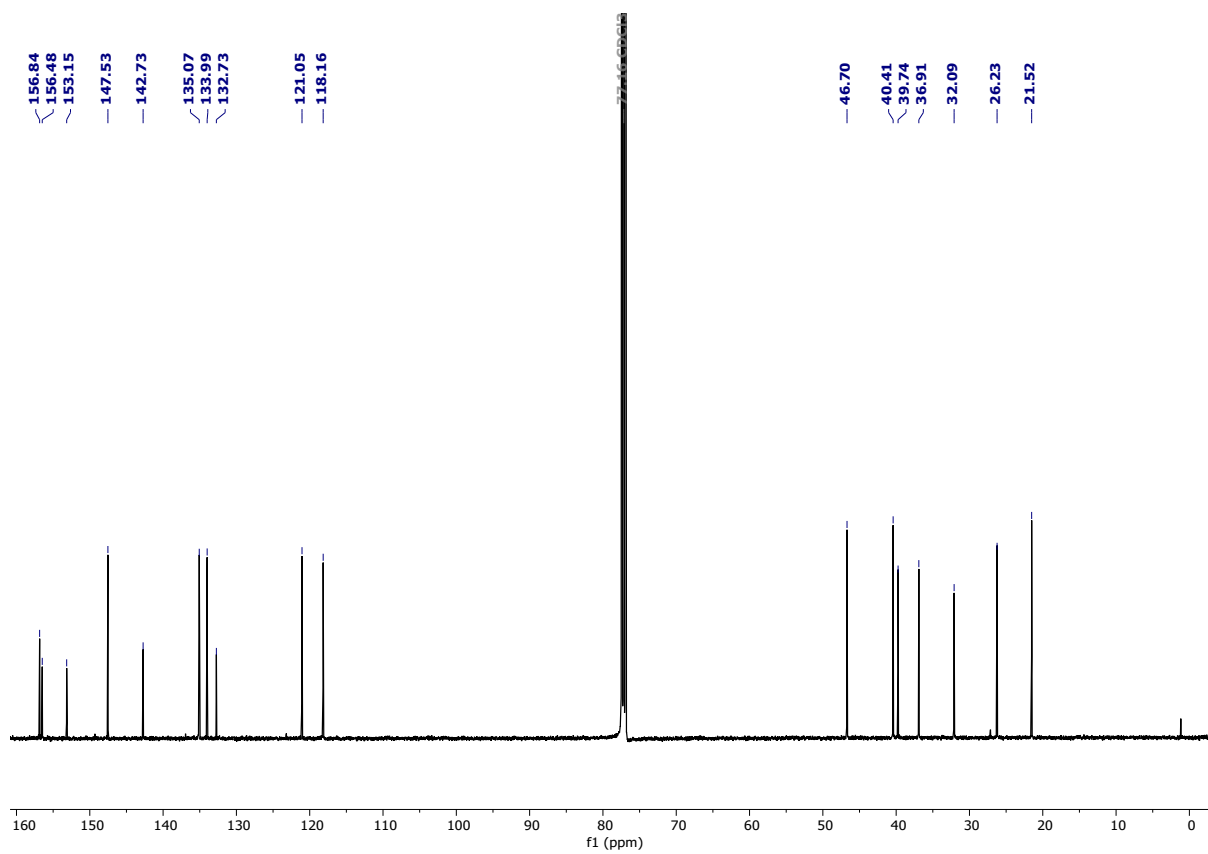

Figure S5.  $^{13}\text{C}$ -NMR spectrum of **6a** in  $\text{CDCl}_3$

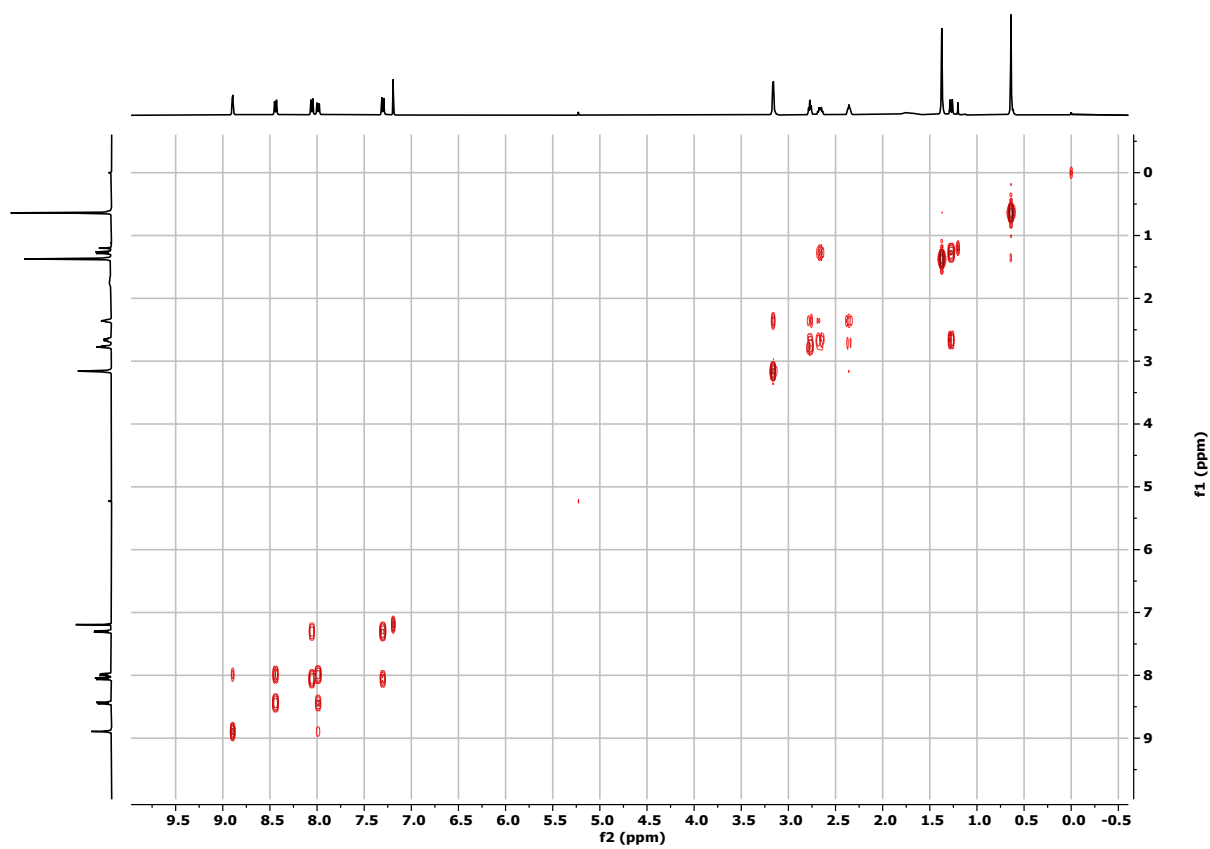

Figure S6. COSY spectrum of **6a** in  $\text{CDCl}_3$

6b

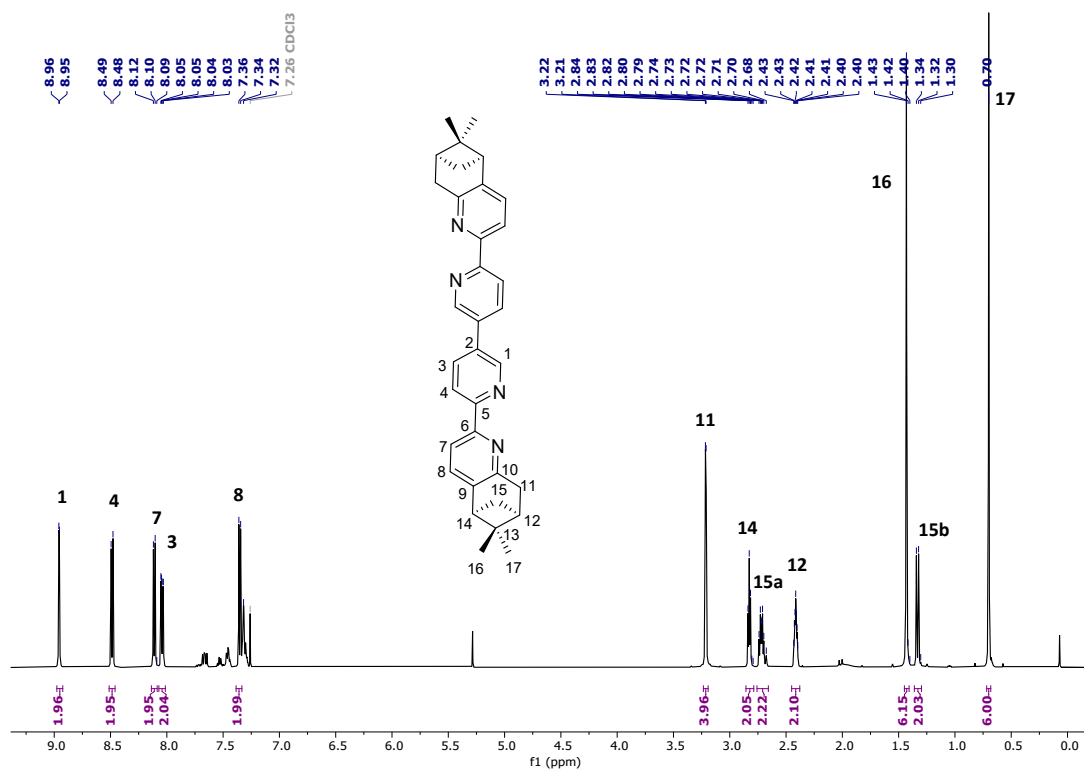

Figure S7. <sup>1</sup>H-NMR spectrum of 6b in CDCl<sub>3</sub>

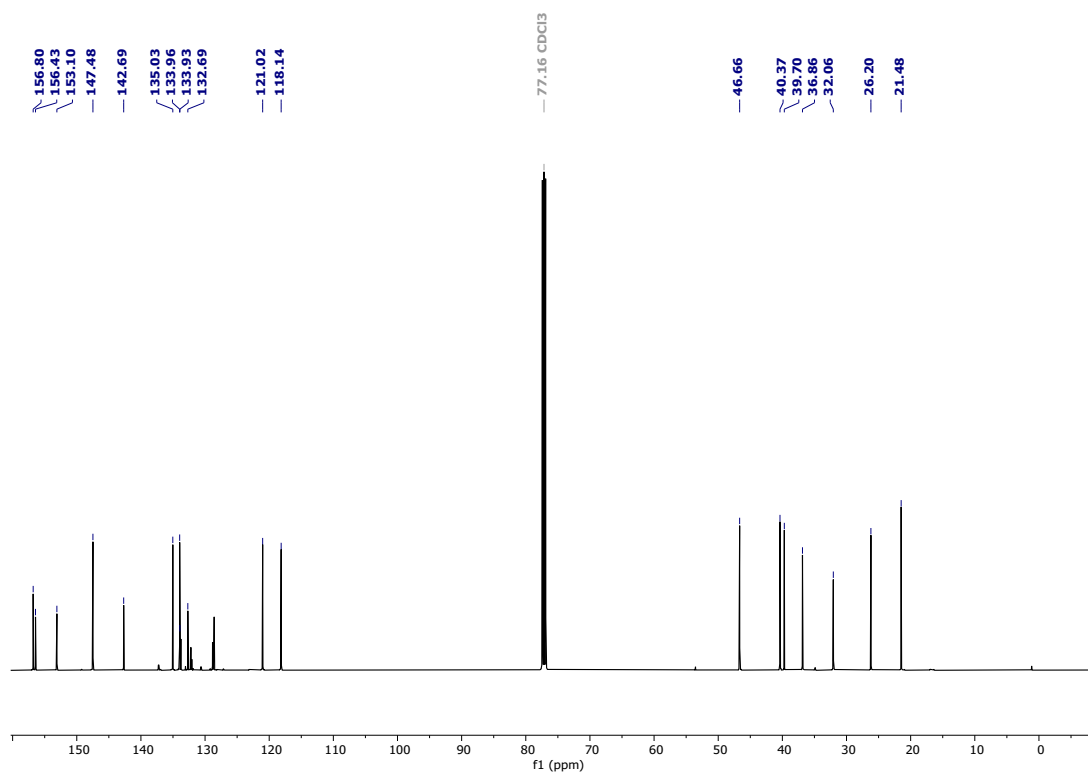

Figure S8. <sup>13</sup>C-NMR spectrum of 6b in CDCl<sub>3</sub>

$d1-[Re_2(5a)(CO)_6Cl_2]$

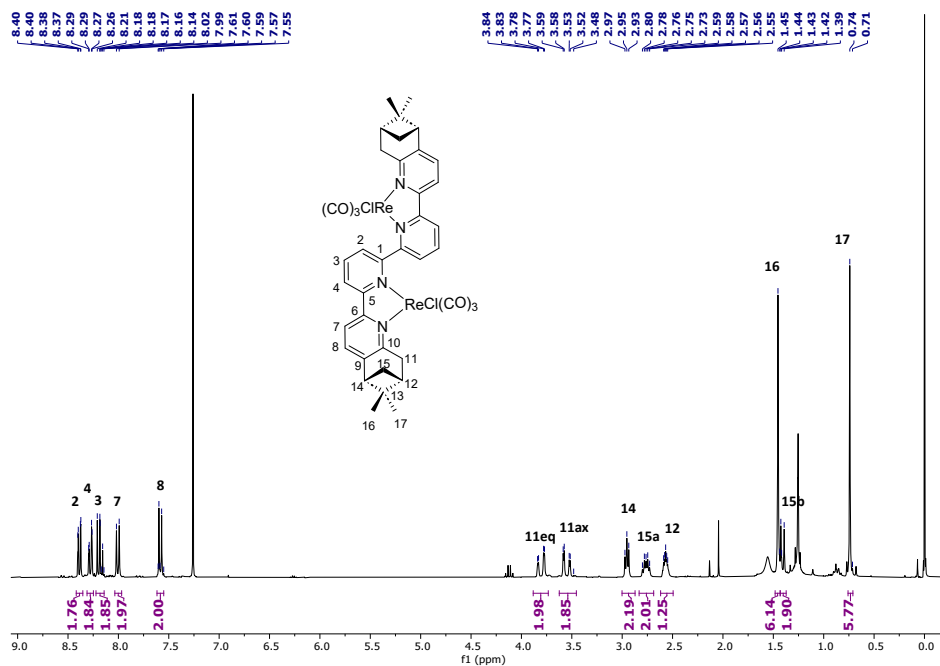

Figure S9.  $^1H$ -NMR spectrum of  $d1-[Re_2(5a)(CO)_6Cl_2]$  in  $CDCl_3$

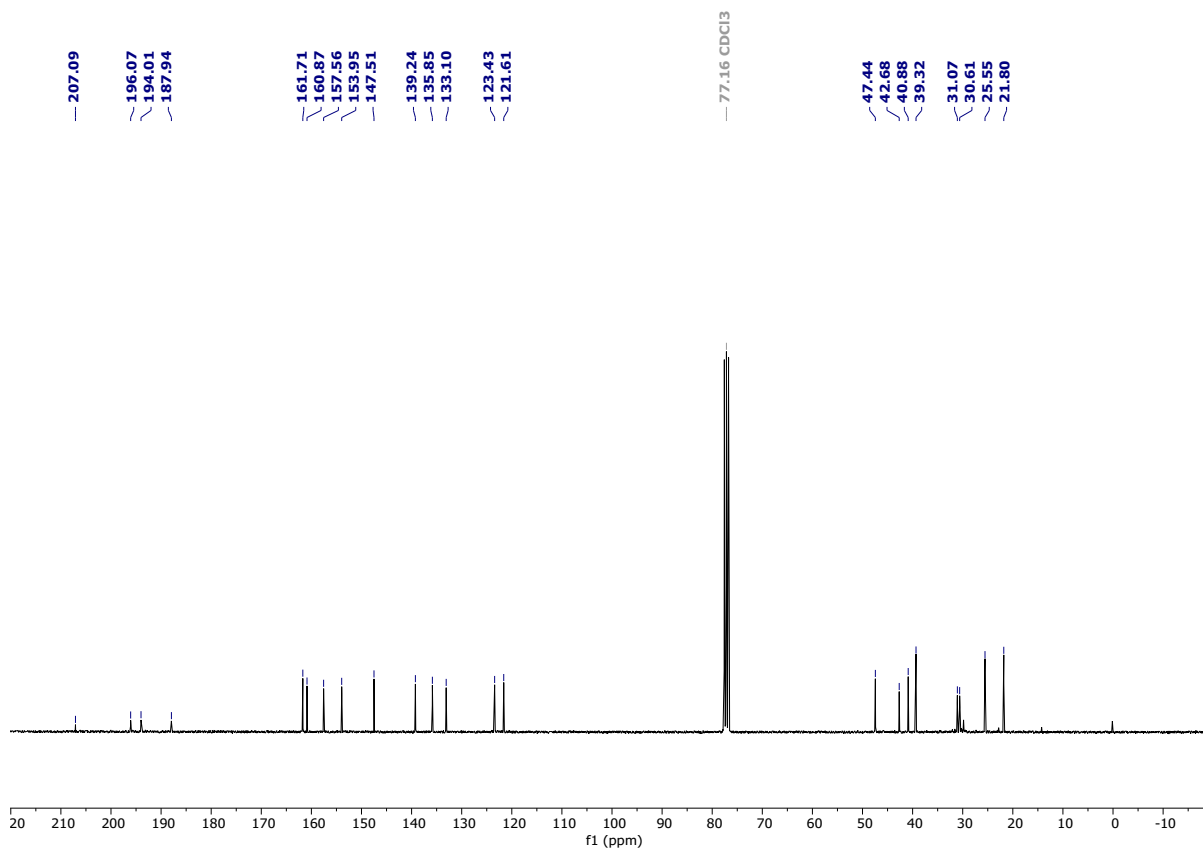

Figure S10.  $^{13}C$ -NMR spectrum of  $d1-[Re_2(5a)(CO)_6Cl_2]$  in  $CDCl_3$

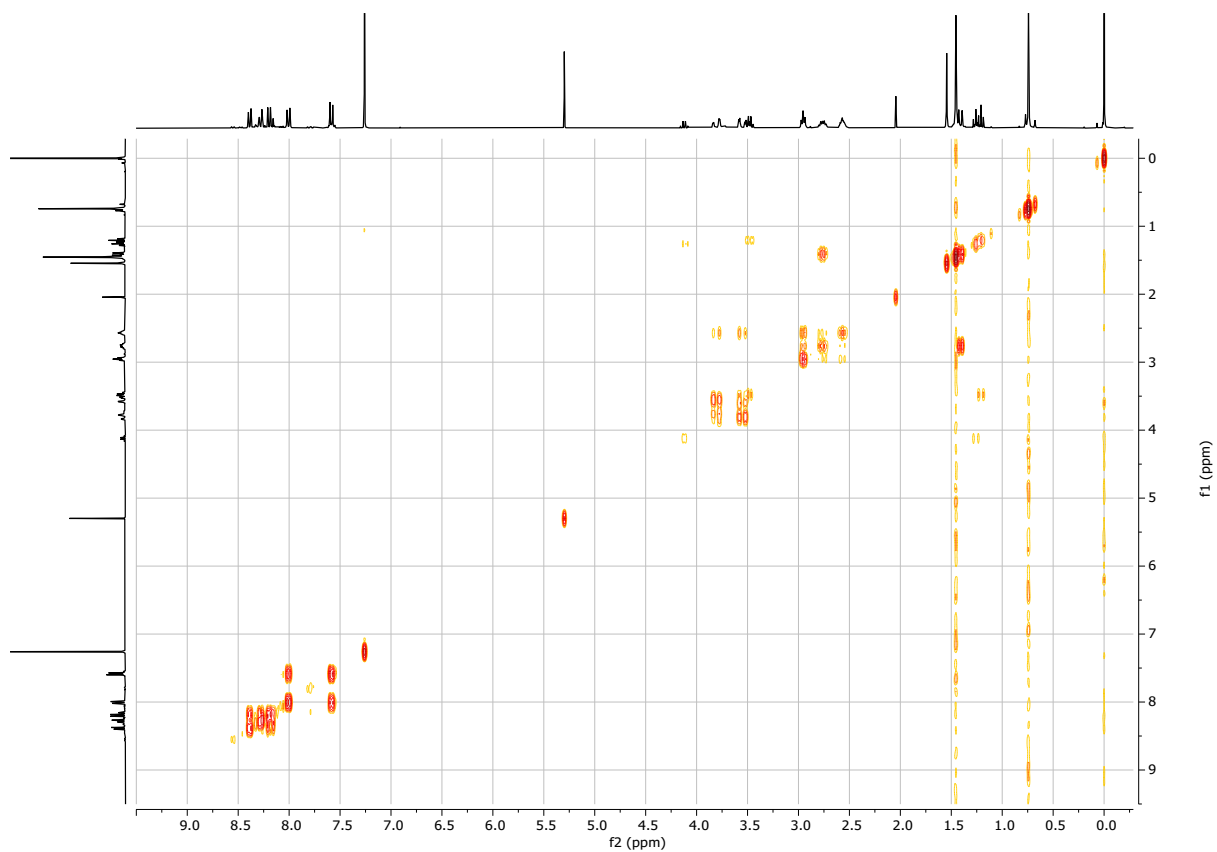

Figure S11. COSY spectrum of  $d1\text{-}[\text{Re}_2(\mathbf{5a})(\text{CO})_6\text{Cl}_2]$  in  $\text{CDCl}_3$

$d2\text{-}[\text{Re}_2(\mathbf{5a})(\text{CO})_6\text{Cl}_2]$

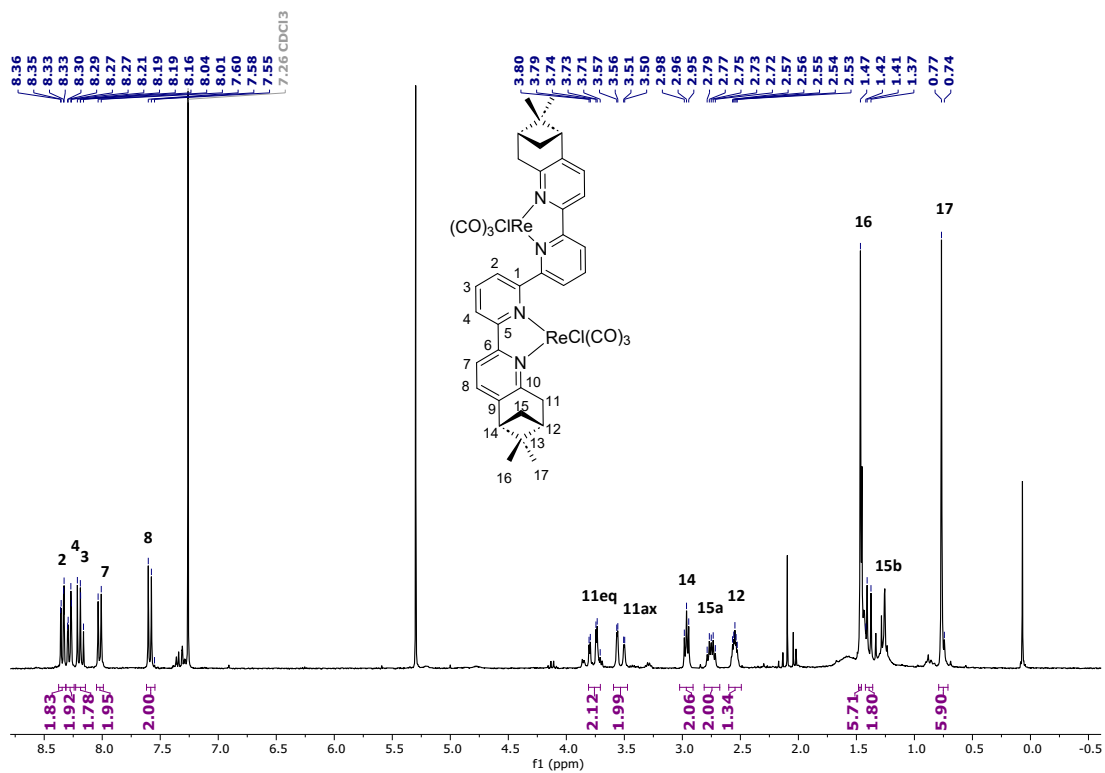

Figure S12.  $^1\text{H-NMR}$  spectrum of  $d2\text{-}[\text{Re}_2(\mathbf{5a})(\text{CO})_6\text{Cl}_2]$  in  $\text{CDCl}_3$

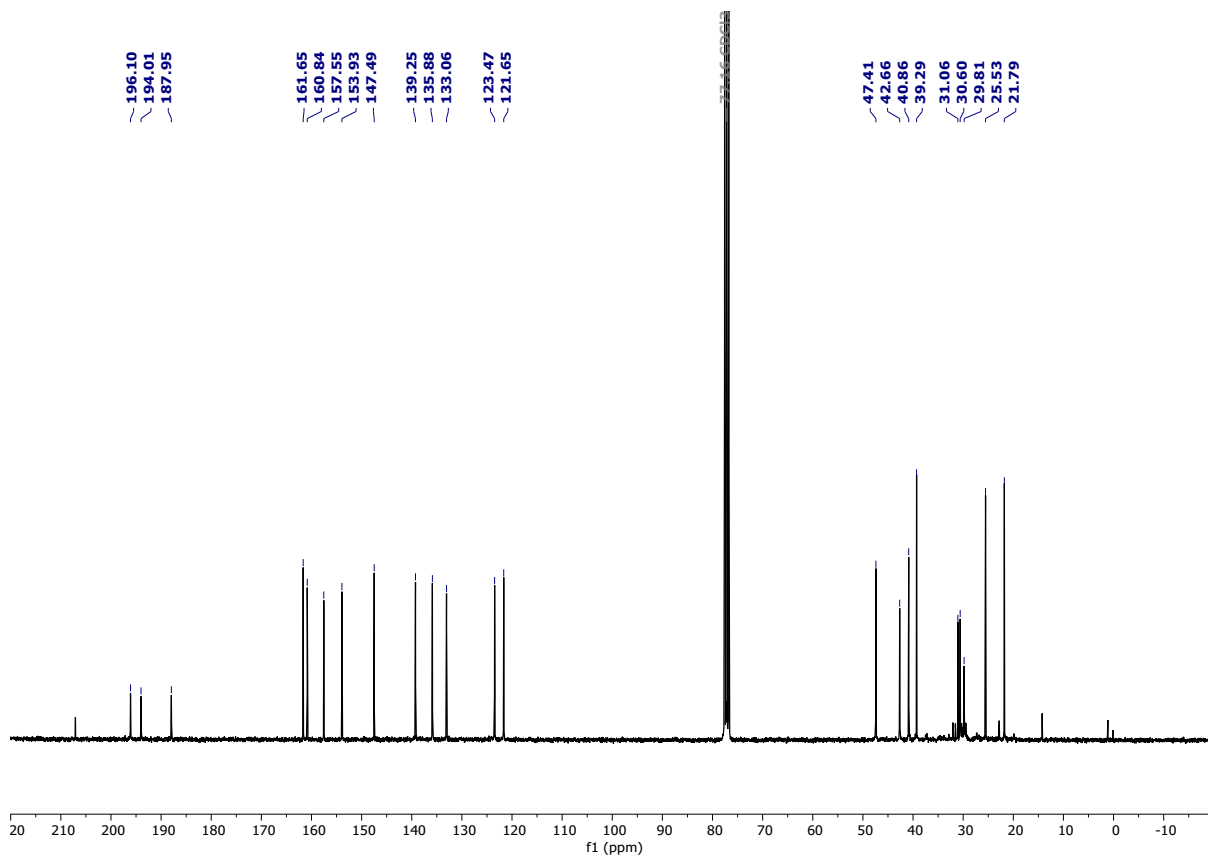

Figure S13.  $^{13}\text{C}$ -NMR spectrum of  $d_2$ - $[\text{Re}_2(\mathbf{5a})(\text{CO})_6\text{Cl}_2]$  in  $\text{CDCl}_3$

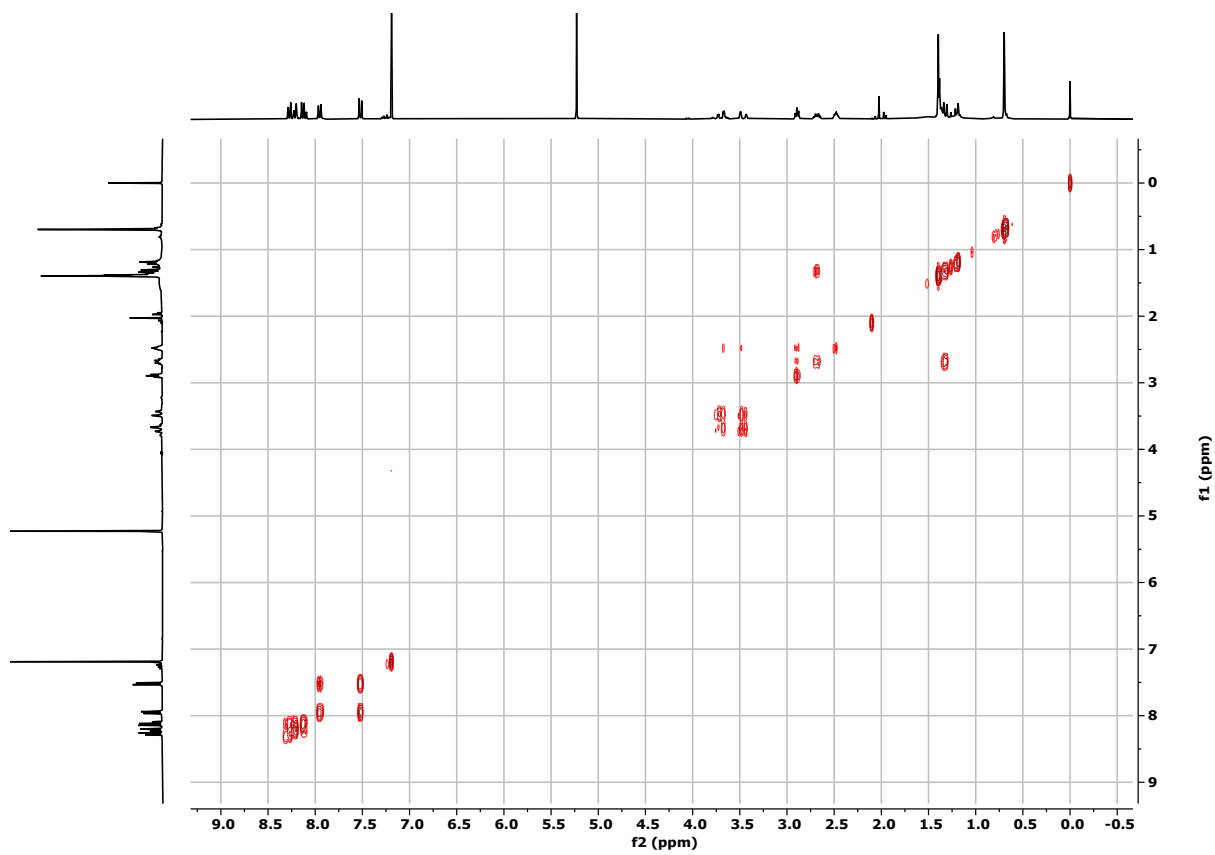

Figure S14. COSY spectrum of  $d_2$ - $[\text{Re}_2(\mathbf{5a})(\text{CO})_6\text{Cl}_2]$  in  $\text{CDCl}_3$



d1-[Re<sub>2</sub>(**5b**)(CO)<sub>6</sub>Cl<sub>2</sub>]

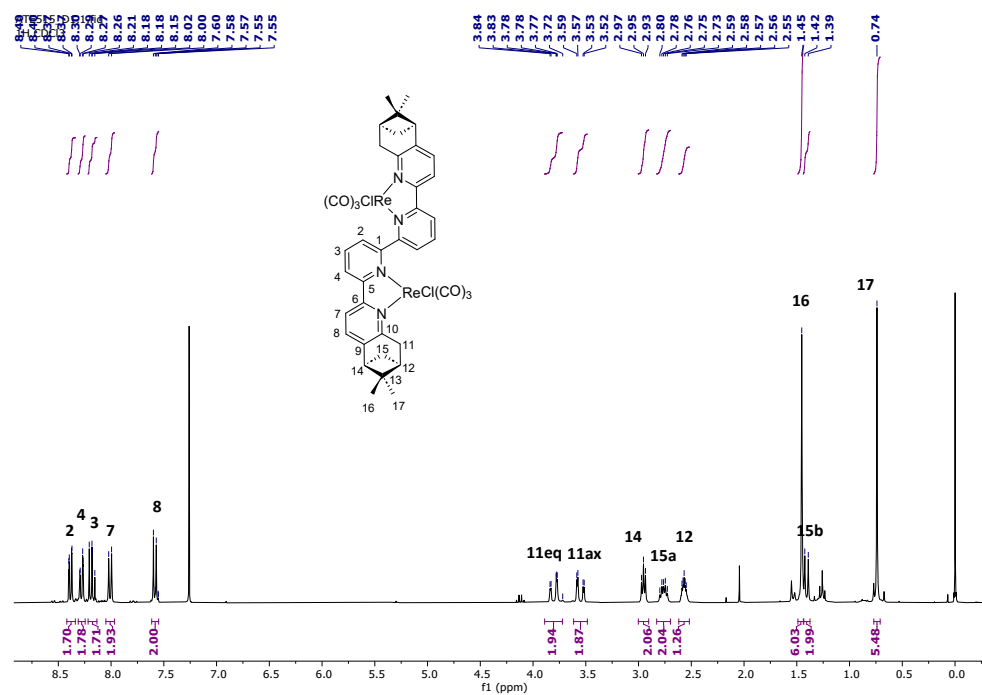

Figure S15. <sup>1</sup>H-NMR spectrum of d1-[Re<sub>2</sub>(**5b**)(CO)<sub>6</sub>Cl<sub>2</sub>] in CDCl<sub>3</sub>

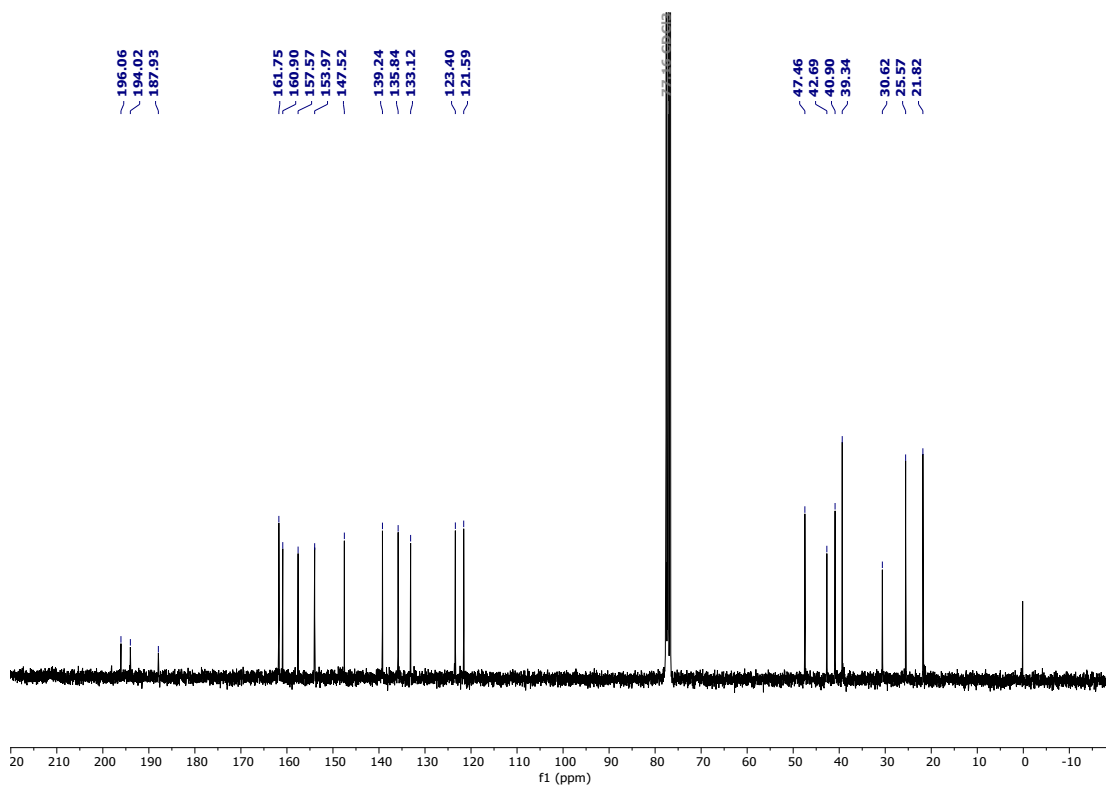

Figure S16. <sup>13</sup>C-NMR spectrum of d1-[Re<sub>2</sub>(**5b**)(CO)<sub>6</sub>Cl<sub>2</sub>] in CDCl<sub>3</sub>

$d_2$ -[Re<sub>2</sub>(**5b**)(CO)<sub>6</sub>Cl<sub>2</sub>]

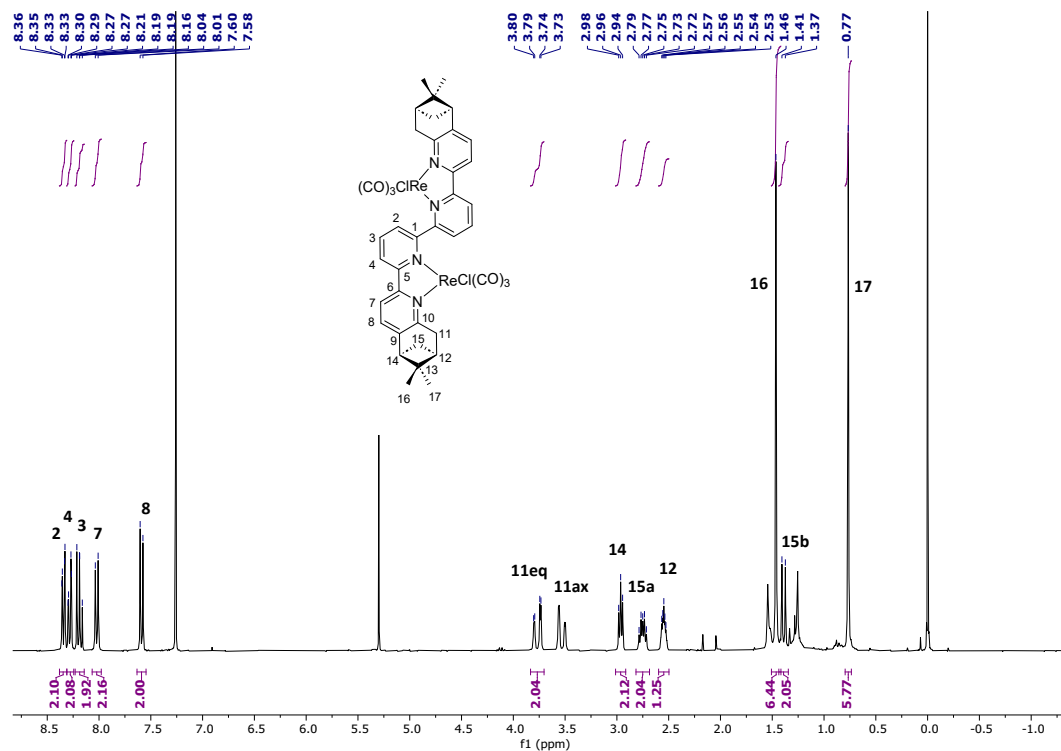

Figure S17. <sup>1</sup>H-NMR spectrum of  $d_2$ -[Re<sub>2</sub>(**5b**)(CO)<sub>6</sub>Cl<sub>2</sub>] in CDCl<sub>3</sub>

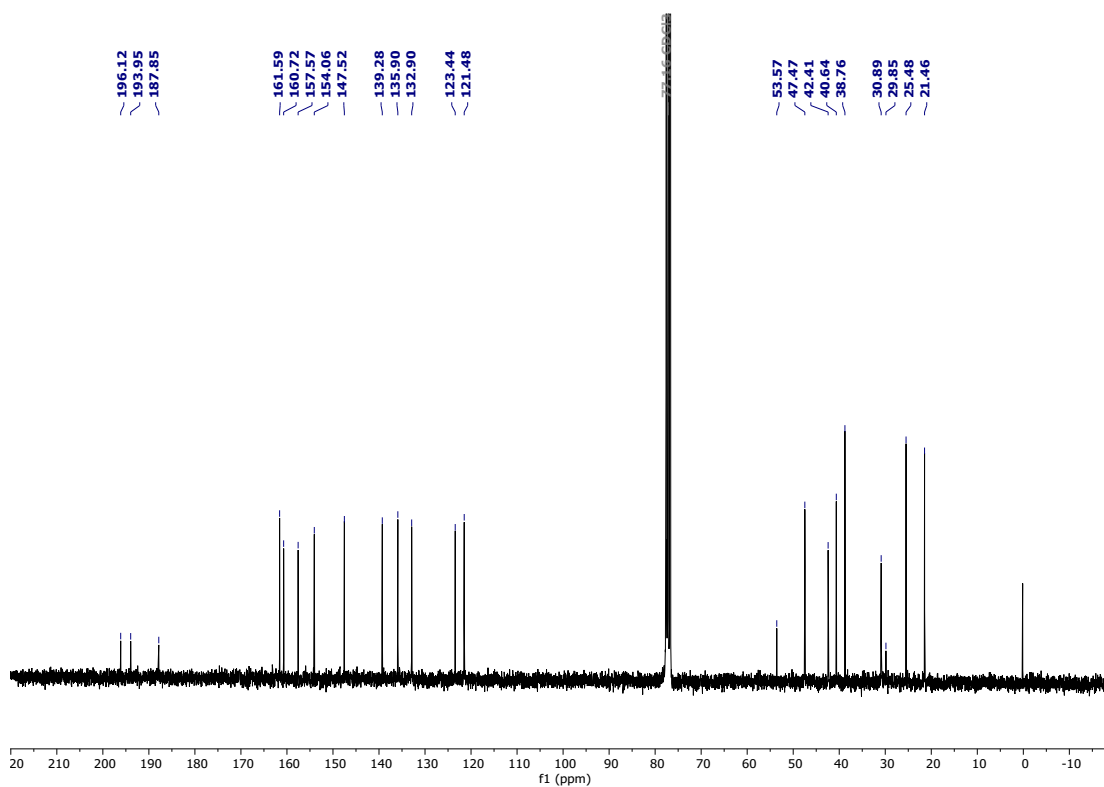

Figure S18. <sup>13</sup>C-NMR spectrum of  $d_2$ -[Re<sub>2</sub>(**5b**)(CO)<sub>6</sub>Cl<sub>2</sub>] in CDCl<sub>3</sub>

d1-[Re<sub>2</sub>(**6a**)(CO)<sub>6</sub>Cl<sub>2</sub>]

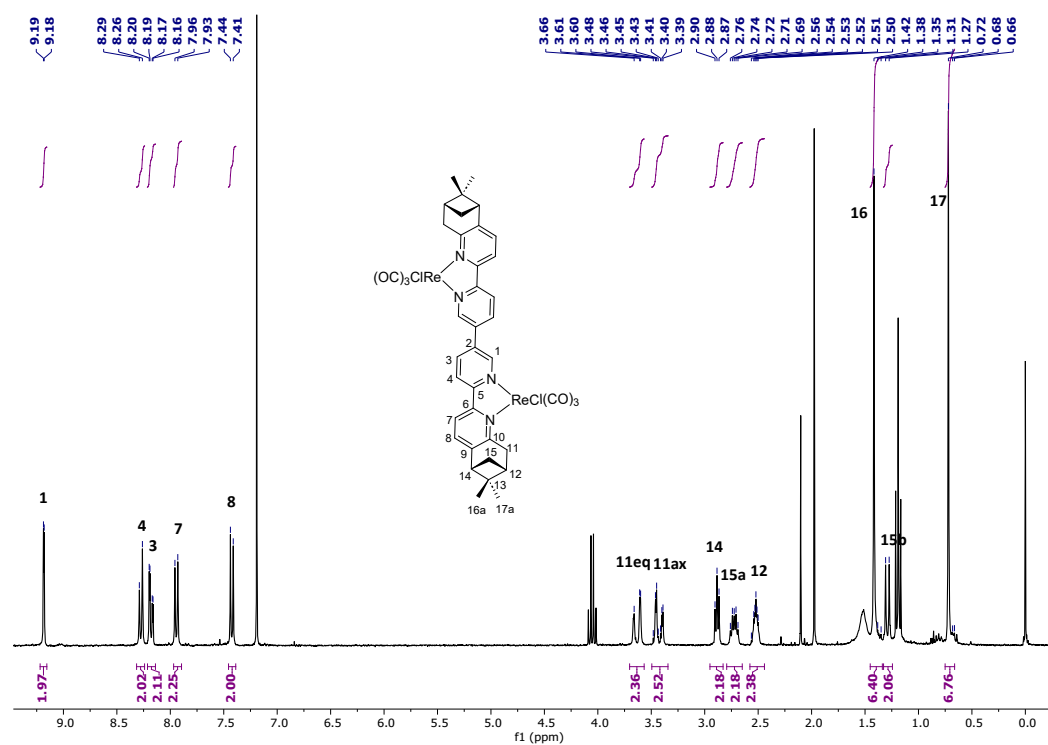

Figure S19. <sup>1</sup>H-NMR spectrum of d1-[Re<sub>2</sub>(**6a**)(CO)<sub>6</sub>Cl<sub>2</sub>] in CDCl<sub>3</sub>

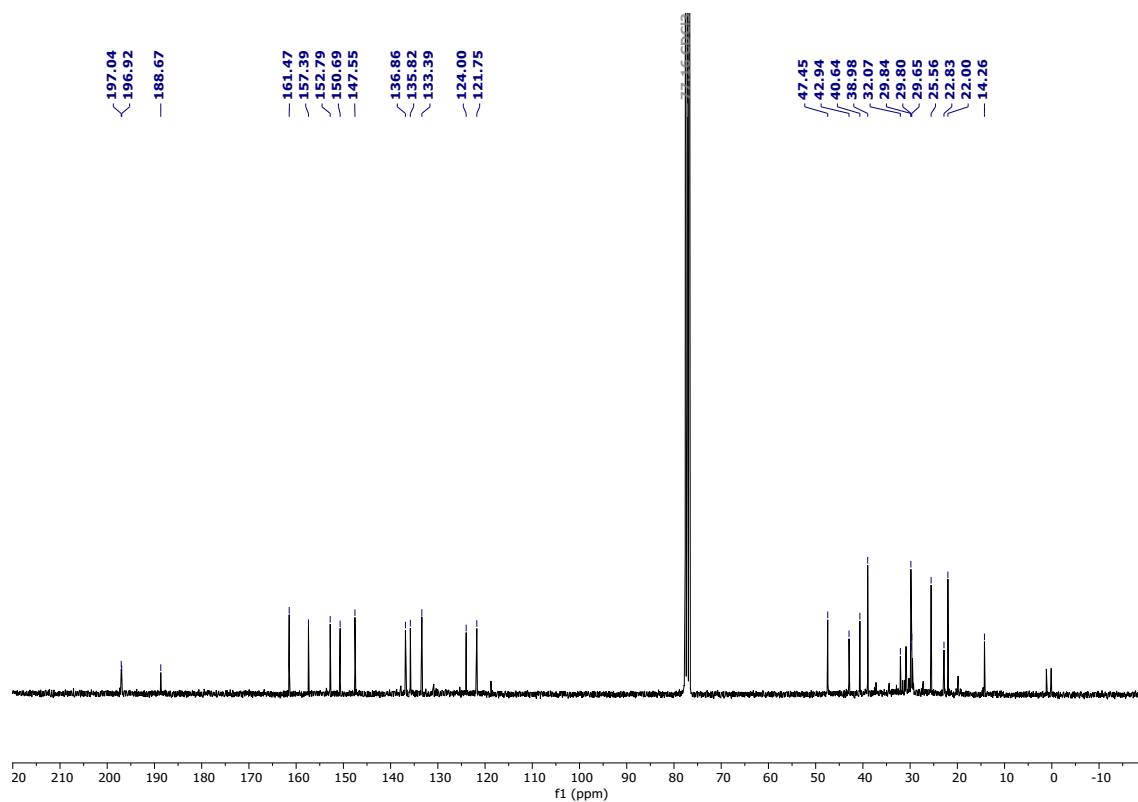

Figure S20.  $^{13}\text{C}$ -NMR spectrum of  $d_1$ - $[\text{Re}_2(\mathbf{6a})(\text{CO})_6\text{Cl}_2]$  in  $\text{CDCl}_3$

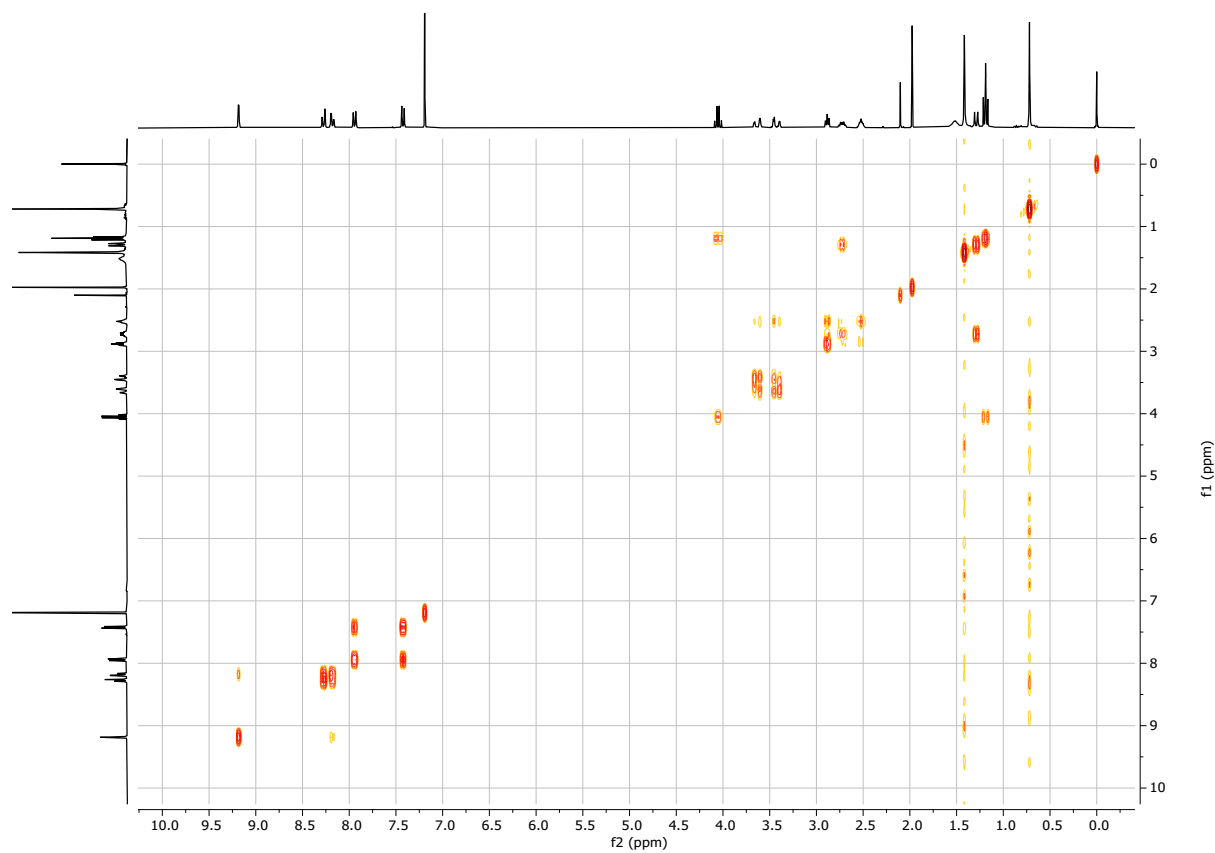

Figure S21. COSY spectrum of  $d_1$ - $[\text{Re}_2(\mathbf{6a})(\text{CO})_6\text{Cl}_2]$  in  $\text{CDCl}_3$

$d_2$ - $[\text{Re}_2(\mathbf{6a})(\text{CO})_6\text{Cl}_2]$

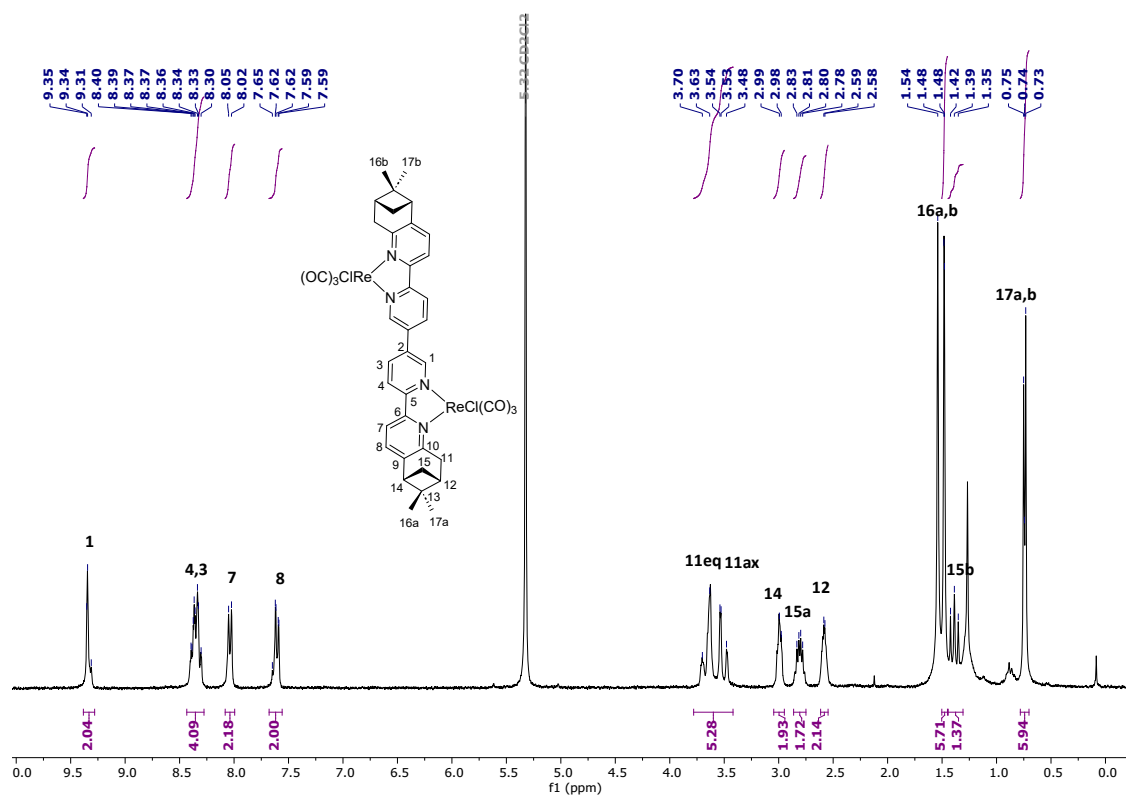

Figure S22.  $^1H$ -NMR spectrum of  $d_2$ - $[Re_2(6a)(CO)_6Cl_2]$  in  $CD_2Cl_2$

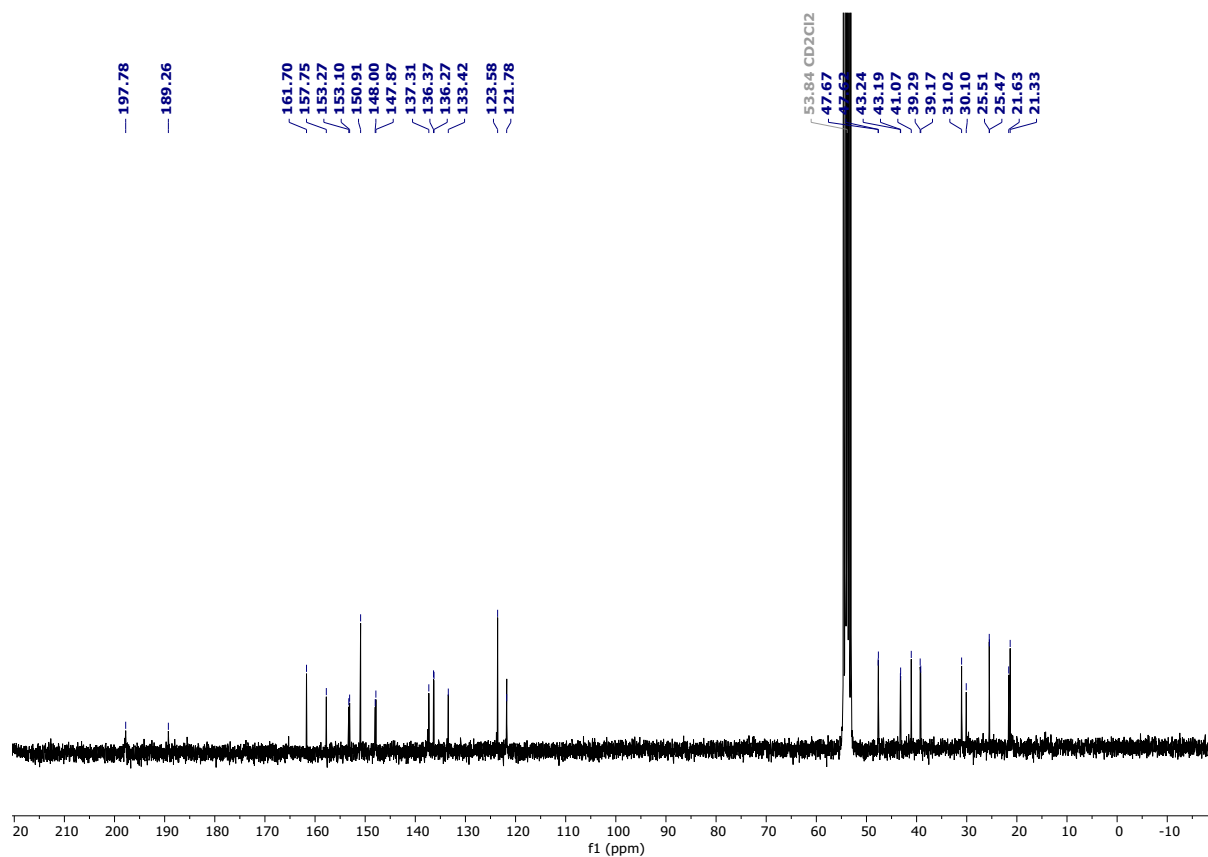

Figure S23.  $^{13}C$ -NMR spectrum of  $d_2$ - $[Re_2(6a)(CO)_6Cl_2]$  in  $CD_2Cl_2$

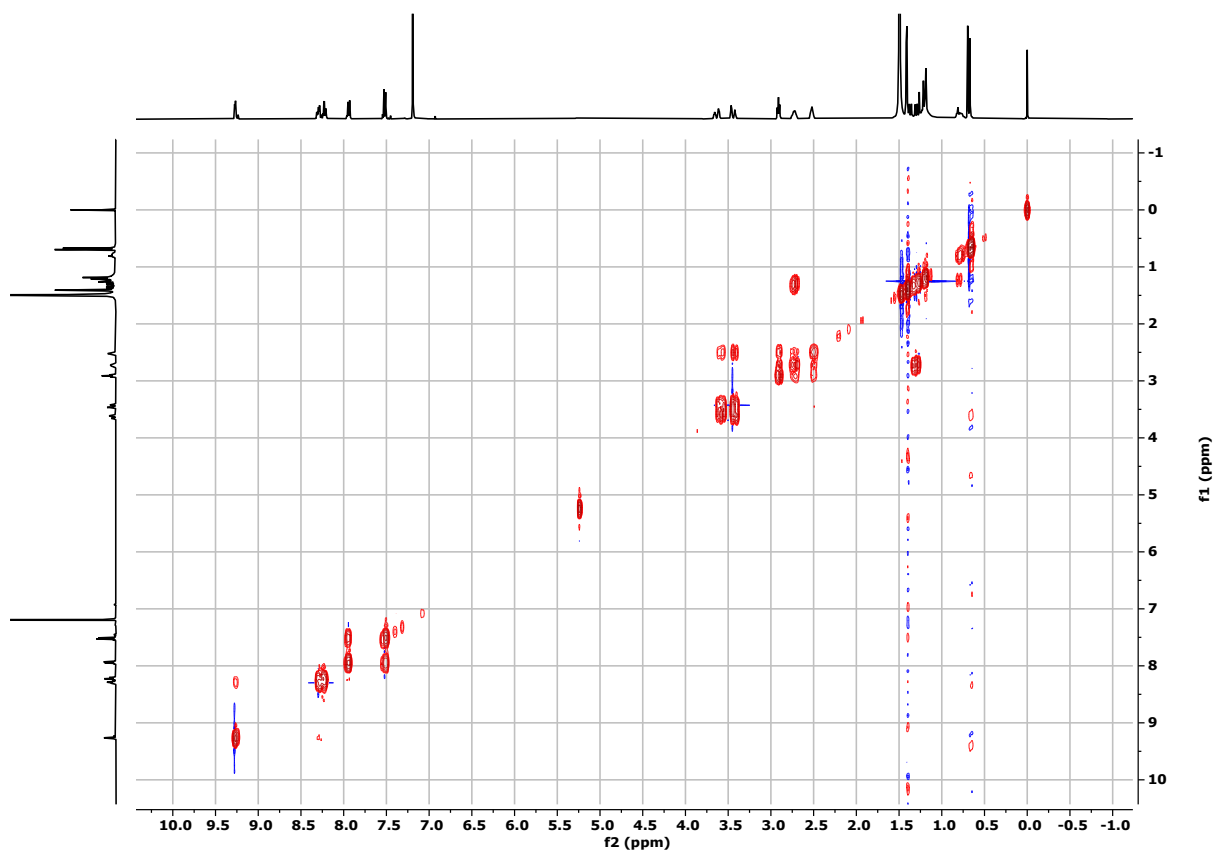

Figure S24. COSY spectrum of  $d_2$ -[Re<sub>2</sub>(**6a**)(CO)<sub>6</sub>Cl<sub>2</sub>] in CD<sub>2</sub>Cl<sub>2</sub>

$d_1$ -[Re<sub>2</sub>(**6b**)(CO)<sub>6</sub>Cl<sub>2</sub>]

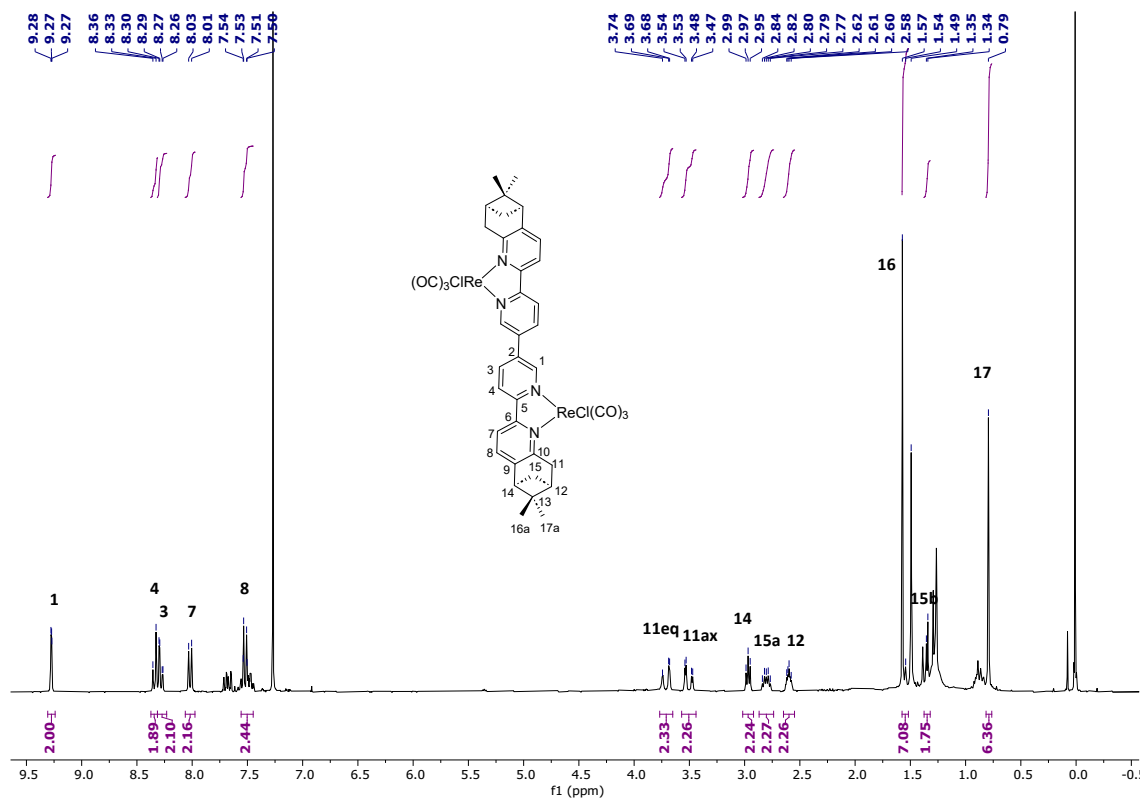

Figure S26.  $^1\text{H-NMR}$  spectrum of  $d_1$ - $[\text{Re}_2(\mathbf{6b})(\text{CO})_6\text{Cl}_2]$  in  $\text{CDCl}_3$

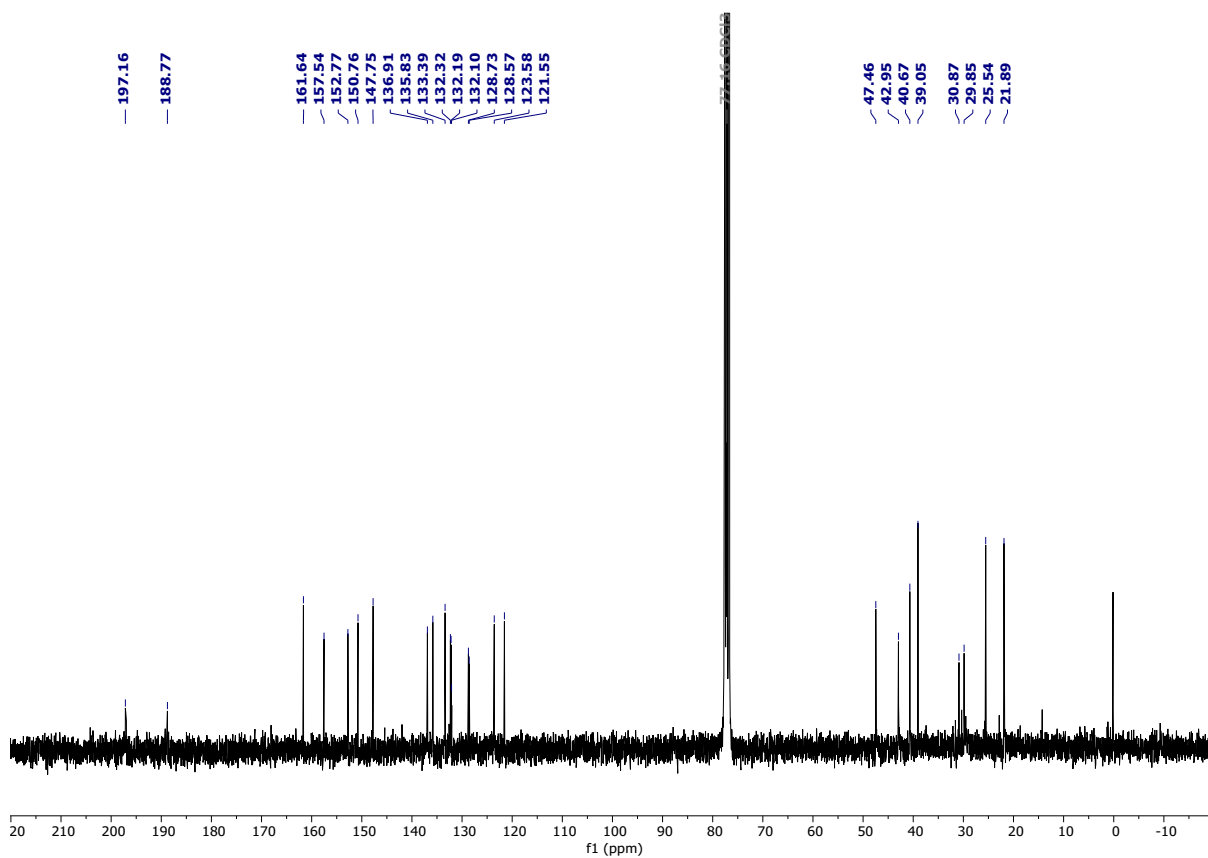

Figure S27.  $^{13}\text{C-NMR}$  spectrum of  $d_1$ - $[\text{Re}_2(\mathbf{6b})(\text{CO})_6\text{Cl}_2]$  in  $\text{CDCl}_3$

d2-[Re<sub>2</sub>(**6b**)(CO)<sub>6</sub>Cl<sub>2</sub>]

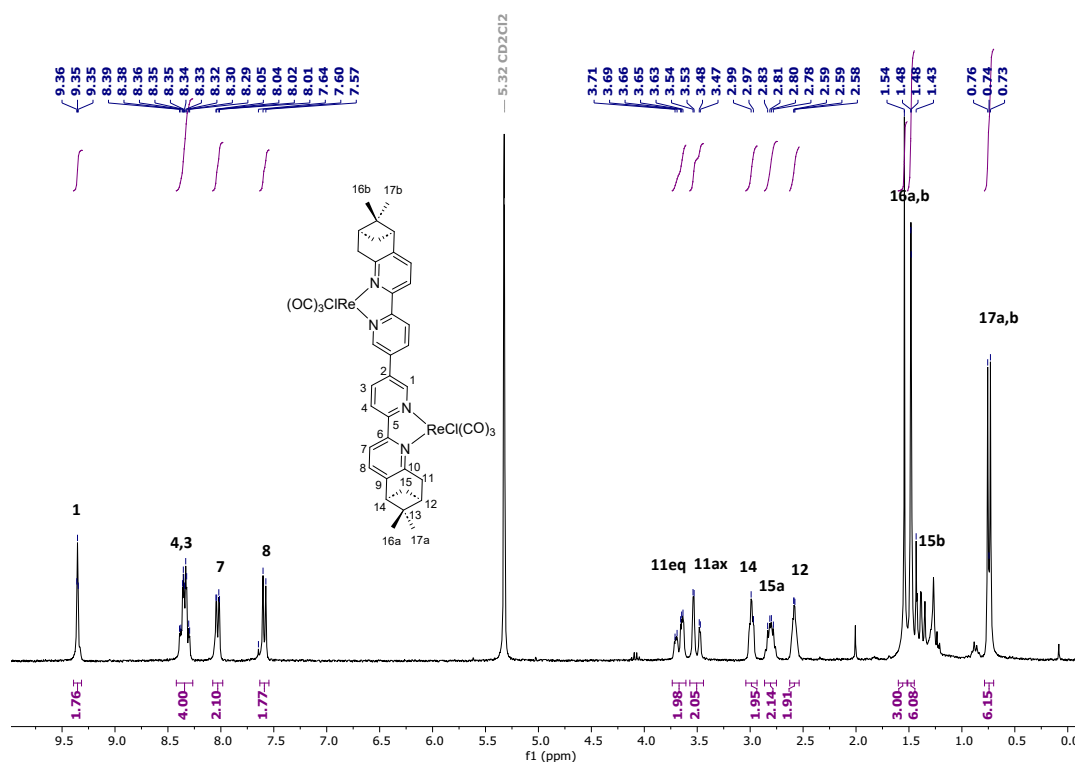

Figure S28. <sup>1</sup>H-NMR spectrum of d<sub>2</sub>-[Re<sub>2</sub>(**6b**)(CO)<sub>6</sub>Cl<sub>2</sub>] in CD<sub>2</sub>Cl<sub>2</sub>

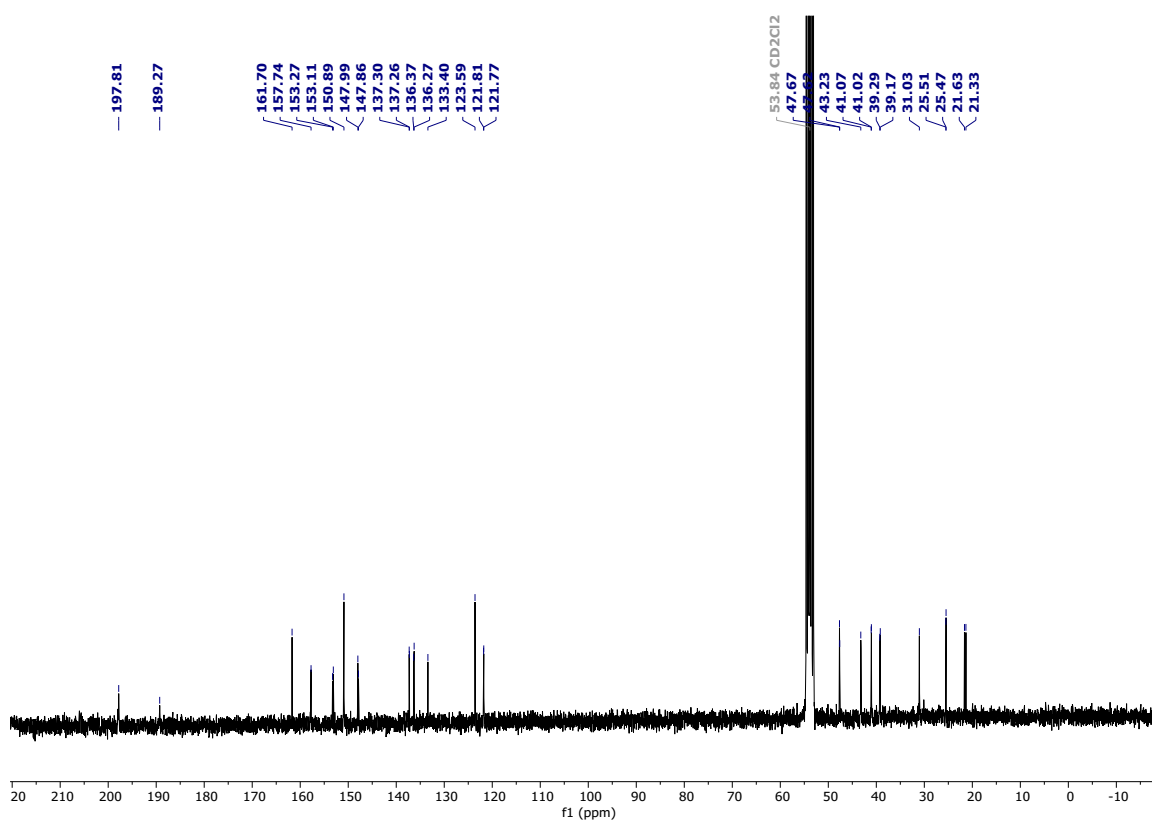

Figure S29. <sup>13</sup>C-NMR spectrum of d<sub>2</sub>-[Re<sub>2</sub>(**6b**)(CO)<sub>6</sub>Cl<sub>2</sub>] in CD<sub>2</sub>Cl<sub>2</sub>



## HRMS spectra

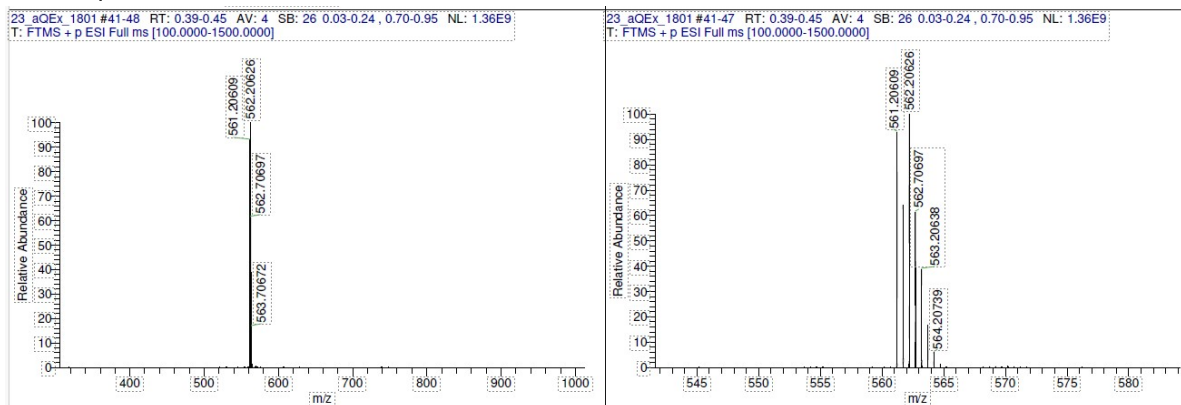

Figure S30. HRMS spectrum of **5b**

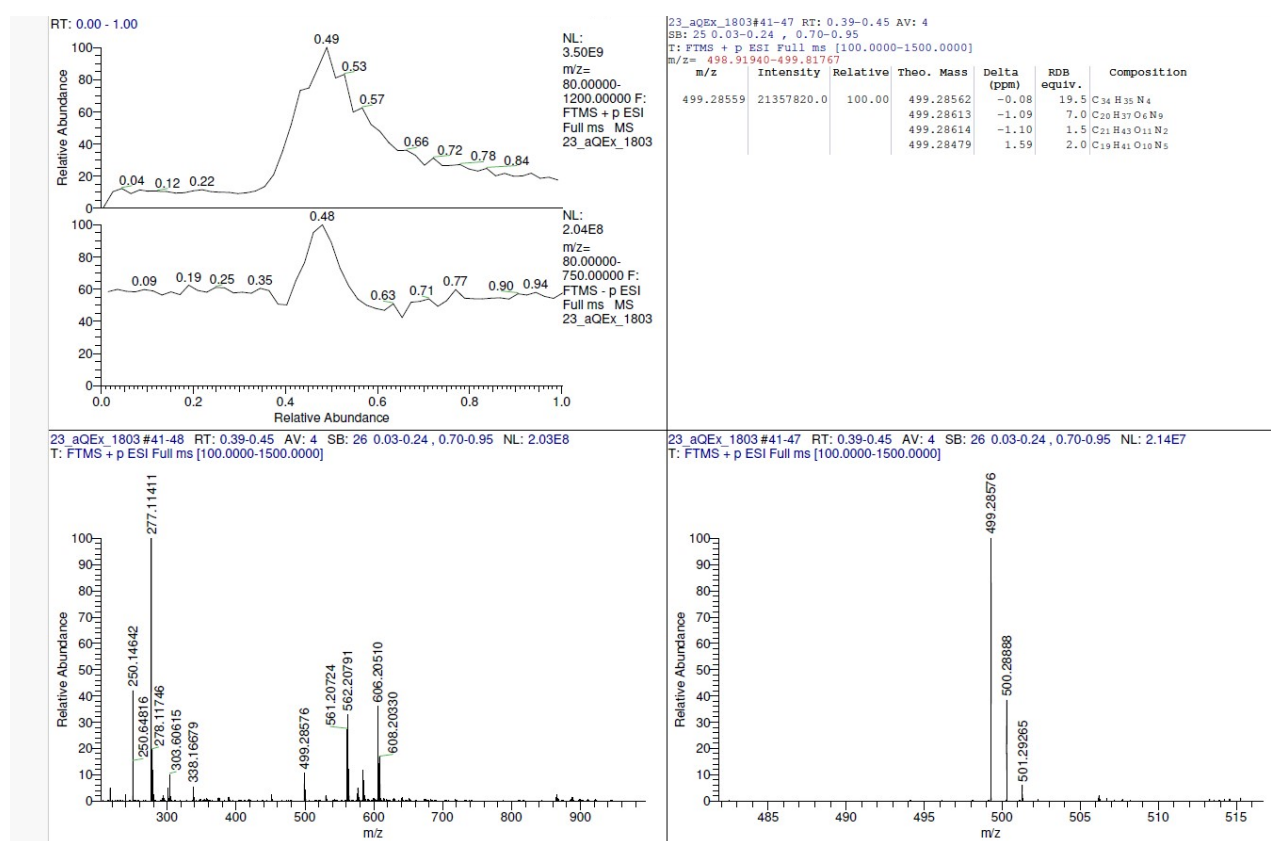

Figure S31. HRMS spectrum of **6a**

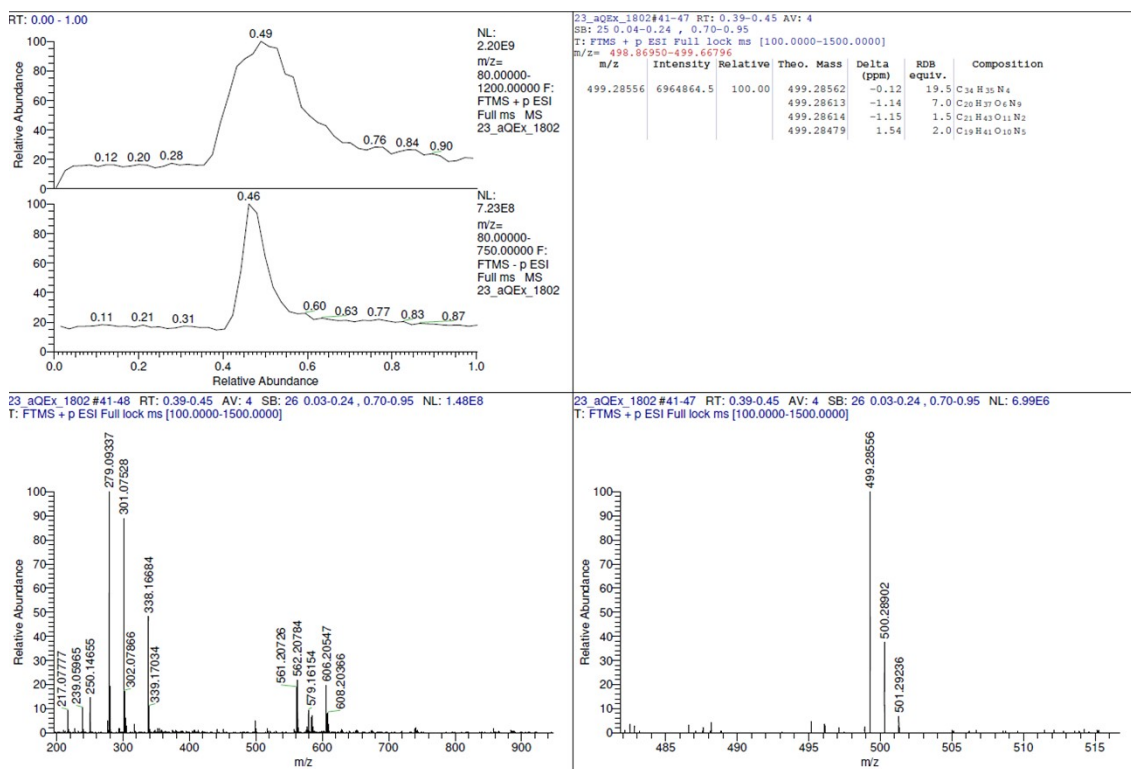

Figure S32. HRMS spectrum of **6b**

**d1-[Re<sub>2</sub>(**5a**)(CO)<sub>6</sub>Cl<sub>2</sub>]**

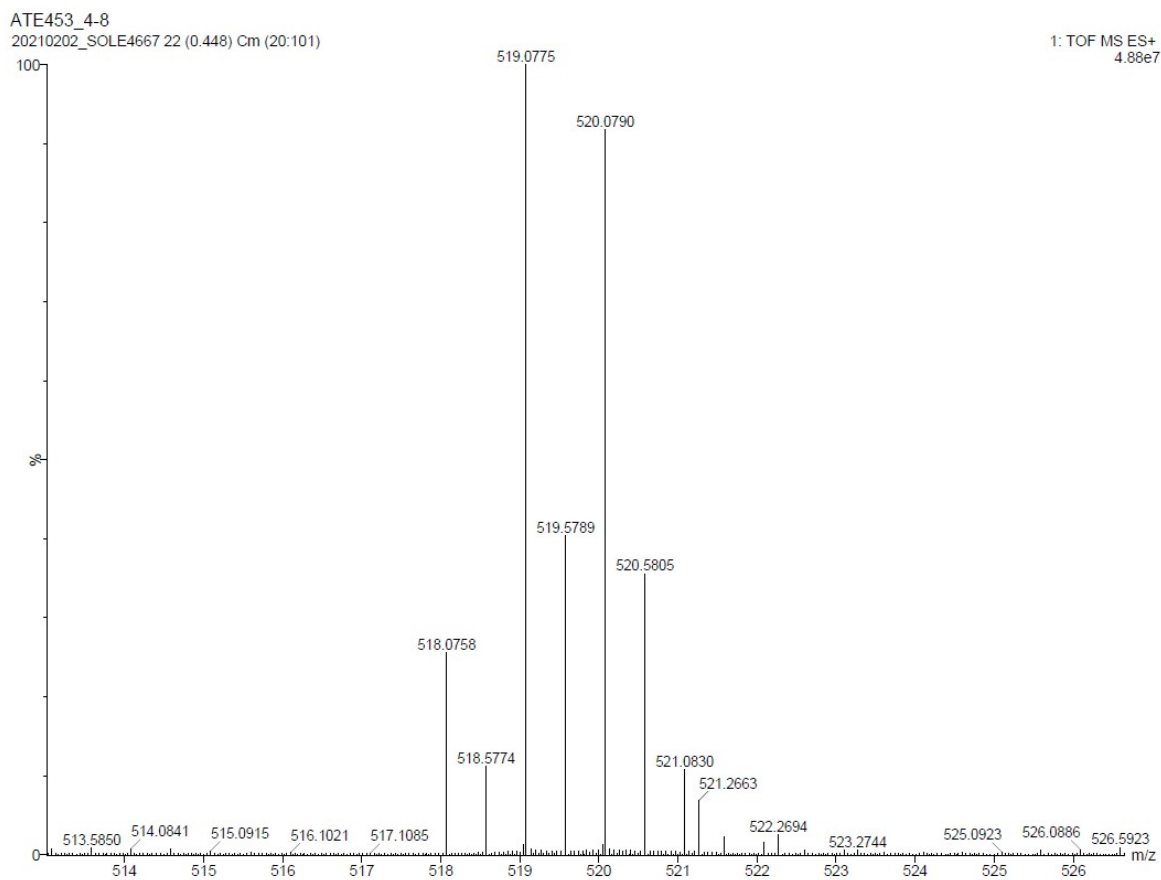

Figure S33. HRMS spectrum of **d1-[Re<sub>2</sub>(**5a**)(CO)<sub>6</sub>Cl<sub>2</sub>]**

d<sub>2</sub>-[Re<sub>2</sub>(5a)(CO)<sub>6</sub>Cl<sub>2</sub>]

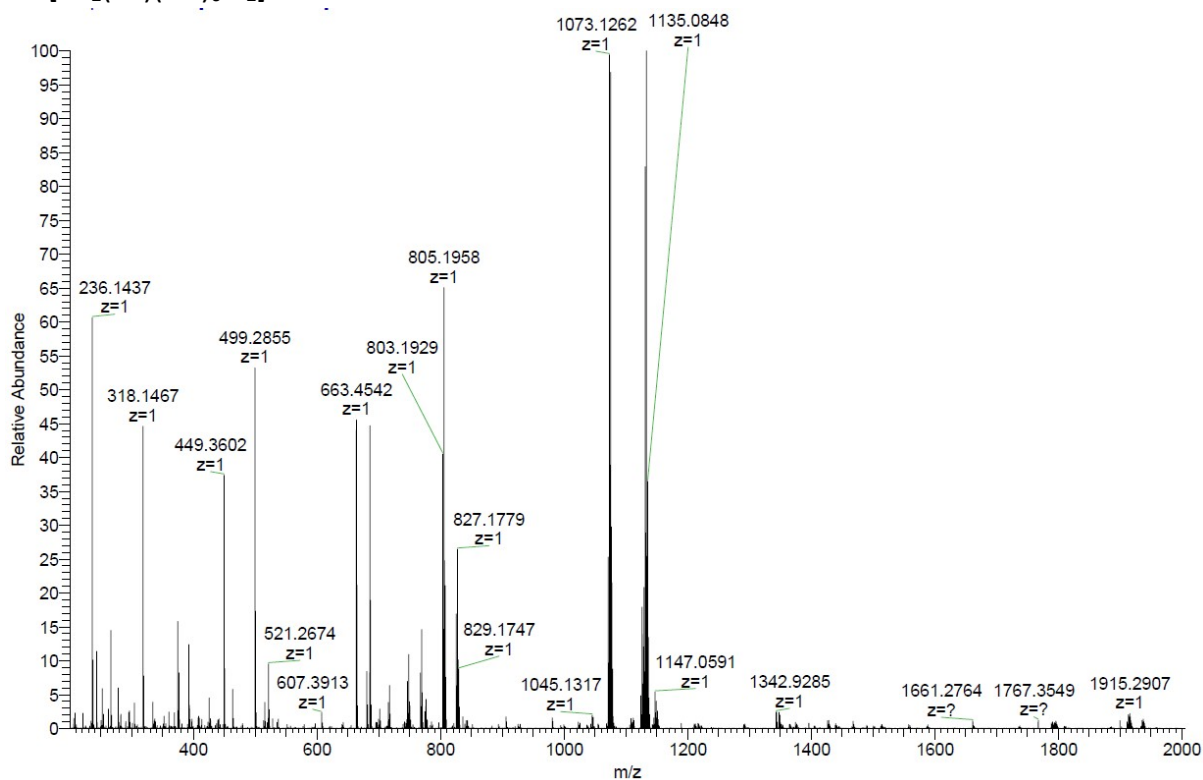

Figure S34. HRMS spectrum of d<sub>2</sub>-[Re<sub>2</sub>(5a)(CO)<sub>6</sub>Cl<sub>2</sub>]

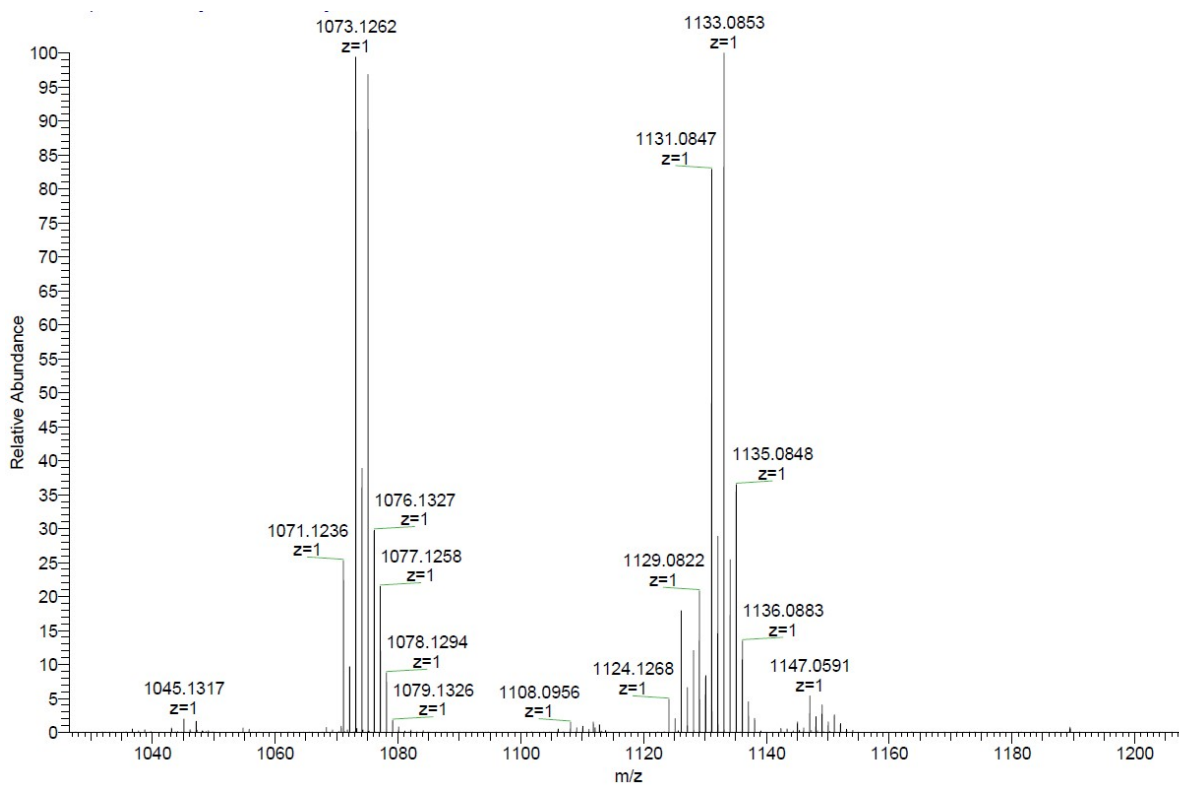

Figure S35. HRMS spectrum of d<sub>2</sub>-[Re<sub>2</sub>(5a)(CO)<sub>6</sub>Cl<sub>2</sub>]

# d1-[Re<sub>2</sub>(5b)(CO)<sub>6</sub>Cl<sub>2</sub>]

D:\Data\Service\Data\23\_aQEx\_0435

Client:

03/15/23 20:01:54

(+)-HR-ESI-MS

Sample: ATE515-D1

Solvent: MeOH

RT: 0.00 - 1.01

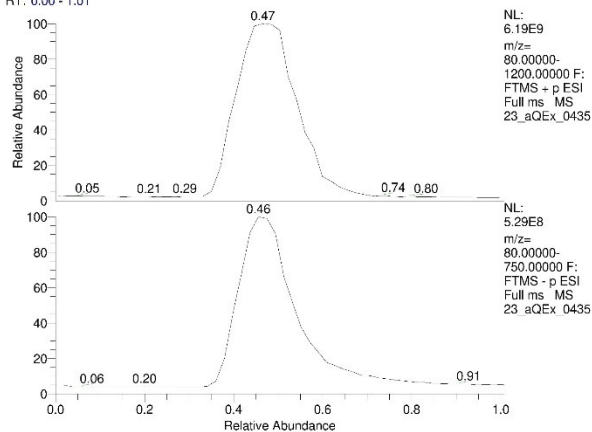

23\_aQEx\_0435#41-47 RT: 0.41-0.47 AV: 4

SB: 25 0.04-0.25 , 0.72-0.98

T: FTMS + p ESI Full lock ms [200.0000-3000.0000]

m/z= 1132.66628-1133.48258

| m/z        | Intensity  | Relative | Theo. Mass | Delta (ppm) | RDB equiv. | Composition                                                                                                                        |
|------------|------------|----------|------------|-------------|------------|------------------------------------------------------------------------------------------------------------------------------------|
| 1133.08305 | 158143/5.0 | 100.00   | 1133.08317 | -0.10       | 20.0       | C <sub>46</sub> H <sub>34</sub> O <sub>5</sub> N <sub>4</sub> Cl <sub>2</sub><br>37Cl <sub>2</sub> Na <sub>2</sub> Re <sub>2</sub> |
|            |            |          | 1133.08402 | -0.85       | 29.5       | C <sub>44</sub> H <sub>32</sub> O <sub>5</sub> N <sub>4</sub> Cl<br>37Cl <sub>2</sub> Na <sub>2</sub> Re <sub>2</sub>              |
|            |            |          | 1133.08182 | 1.08        | 20.5       | C <sub>38</sub> H <sub>30</sub> O <sub>5</sub> N <sub>4</sub> Cl <sub>2</sub><br>37Cl <sub>2</sub> Na <sub>2</sub> Re <sub>2</sub> |
|            |            |          | 1133.08134 | 1.51        | 25.0       | C <sub>44</sub> H <sub>34</sub> O <sub>6</sub> N <sub>3</sub> Cl<br>37Cl <sub>2</sub> Na <sub>2</sub> Re <sub>2</sub>              |
|            |            |          | 1133.08031 | 2.42        | 20.5       | C <sub>41</sub> H <sub>40</sub> O <sub>5</sub> N <sub>2</sub> Cl <sub>2</sub><br>37Cl <sub>2</sub> Na <sub>2</sub> Re <sub>2</sub> |
|            |            |          | 1133.08585 | -2.47       | 24.5       | C <sub>43</sub> H <sub>37</sub> O <sub>5</sub> N <sub>2</sub> Cl <sub>2</sub><br>37Cl <sub>2</sub> Na <sub>2</sub> Re <sub>2</sub> |
|            |            |          | 1133.07982 | 2.85        | 25.0       | C <sub>44</sub> H <sub>37</sub> O <sub>5</sub> N <sub>3</sub> Cl<br>37Cl <sub>2</sub> Na <sub>2</sub> Re <sub>2</sub>              |
|            |            |          | 1133.08655 | -3.08       | 25.5       | C <sub>41</sub> H <sub>34</sub> O <sub>5</sub> N <sub>4</sub><br>37Cl <sub>2</sub> Na <sub>2</sub> Re <sub>2</sub>                 |
|            |            |          | 1133.07881 | 3.75        | 29.0       | C <sub>44</sub> H <sub>32</sub> O <sub>4</sub> N <sub>3</sub> Cl <sub>2</sub> Na<br>Re <sub>2</sub>                                |
|            |            |          | 1133.08736 | -3.80       | 24.5       | C <sub>40</sub> H <sub>34</sub> O <sub>6</sub> N <sub>4</sub> Cl <sub>2</sub> Na<br>Re <sub>2</sub>                                |

23\_aQEx\_0435 #39-46 RT: 0.39-0.45 AV: 4 SB: 24 0.03-0.24 , 0.70-0.95 NL: 3.76E8  
T: FTMS + p ESI Full lock ms [200.0000-3000.0000]

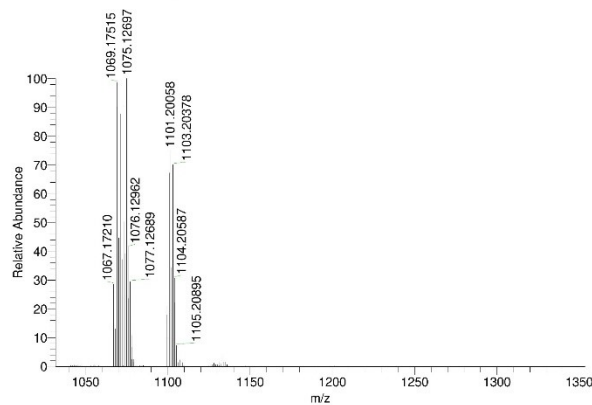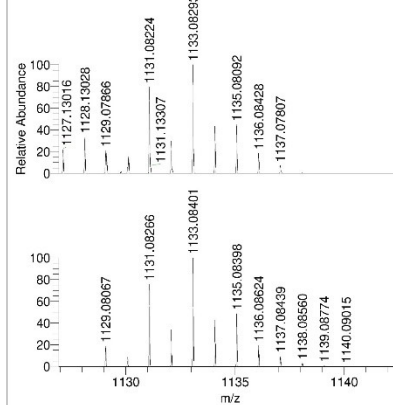

NL: 1.29E7  
 23\_aQEx\_0435#39-45 RT:  
 0.39-0.45 AV: 4 SB: 24  
 0.03-0.24 , 0.70-0.95 T: FTMS +  
 p ESI Full lock ms  
 [200.0000-3000.0000]

NL: 6.33E3  
 C<sub>46</sub>H<sub>34</sub>Cl<sub>2</sub>N<sub>4</sub>O<sub>5</sub>Re<sub>2</sub>Na:  
 C<sub>40</sub>H<sub>34</sub>Cl<sub>2</sub>N<sub>4</sub>O<sub>6</sub>Re<sub>2</sub>Na<sub>1</sub>  
 p (gss, s /p:40) Chrg 1  
 R: 35000 Res .Pwr . @FWHM

Figure S36. HRMS spectrum of d1-[Re<sub>2</sub>(5b)(CO)<sub>6</sub>Cl<sub>2</sub>]

# d2-[Re<sub>2</sub>(5b)(CO)<sub>6</sub>Cl<sub>2</sub>]

D:\Data\Service\Data\23\_aQEx\_0436

Client:

03/15/23 20:03:52

(+)-HR-ESI-MS

Sample: ATE515-D2

Solvent: MeOH

RT: 0.00 - 1.01

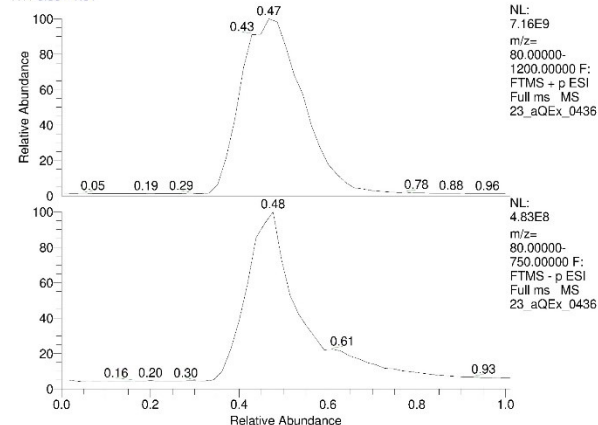

23\_aQEx\_0436 #41-47 RT: 0.41-0.47 AV: 4 SB: 24 0.03-0.24 , 0.70-0.95 NL: 6.92E8  
 T: FTMS + p ESI Full lock ms [200.0000-3000.0000]

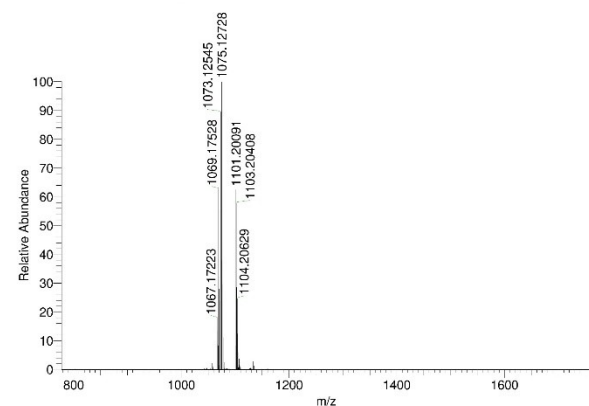

| m/z        | Intensity  | Relative | Theo. Mass | Delta (ppm) | RDB equiv. | Composition                                                                                         |
|------------|------------|----------|------------|-------------|------------|-----------------------------------------------------------------------------------------------------|
| 1133.08339 | 19398146.0 | 100.00   | 1133.08317 | 0.20        | 20.0       | C <sub>46</sub> H <sub>34</sub> O <sub>6</sub> N <sub>4</sub> Cl <sub>2</sub><br>Re <sub>2</sub>    |
|            |            |          | 1133.08402 | -0.55       | 29.5       | C <sub>44</sub> H <sub>32</sub> O <sub>6</sub> N <sub>4</sub> Cl                                    |
|            |            |          | 1133.08182 | 1.39        | 20.5       | C <sub>38</sub> H <sub>37</sub> O <sub>6</sub> N <sub>4</sub> Cl <sub>2</sub><br>Re <sub>2</sub>    |
|            |            |          | 1133.08134 | 1.82        | 25.0       | C <sub>41</sub> H <sub>34</sub> O <sub>6</sub> N <sub>3</sub> Cl                                    |
|            |            |          | 1133.08585 | -2.16       | 24.5       | C <sub>43</sub> H <sub>37</sub> O <sub>6</sub> N <sub>2</sub> Cl <sub>2</sub><br>Re <sub>2</sub>    |
|            |            |          | 1133.08031 | 2.72        | 20.5       | C <sub>41</sub> H <sub>40</sub> O <sub>2</sub> N <sub>2</sub> Cl <sub>2</sub><br>Re <sub>2</sub>    |
|            |            |          | 1133.08655 | -2.78       | 25.5       | C <sub>41</sub> H <sub>34</sub> O <sub>6</sub> N <sub>4</sub>                                       |
|            |            |          | 1133.07982 | 3.15        | 25.0       | C <sub>44</sub> H <sub>37</sub> O <sub>6</sub> N <sub>3</sub> Cl                                    |
|            |            |          | 1133.08736 | -3.50       | 24.5       | C <sub>40</sub> H <sub>34</sub> O <sub>6</sub> N <sub>4</sub> Cl <sub>2</sub> Na<br>Re <sub>2</sub> |
|            |            |          | 1133.08789 | -3.97       | 25.0       | C <sub>42</sub> H <sub>38</sub> O <sub>6</sub> N <sub>3</sub> Cl <sub>2</sub><br>Na Re <sub>2</sub> |

  

| m/z        | Relative Abundance |
|------------|--------------------|
| 1128.13091 | ~10                |
| 1129.13316 | ~10                |
| 1131.08254 | ~100               |
| 1131.13491 | ~10                |
| 1133.08320 | ~100               |
| 1135.08307 | ~10                |
| 1136.08556 | ~10                |
| 1137.08173 | ~10                |

  

| m/z        | Relative Abundance |
|------------|--------------------|
| 1129.08067 | ~10                |
| 1131.08266 | ~100               |
| 1133.08401 | ~100               |
| 1135.08398 | ~10                |
| 1136.08624 | ~10                |
| 1137.08439 | ~10                |
| 1138.08560 | ~10                |
| 1139.08774 | ~10                |
| 1140.09015 | ~10                |

NL: 6.33E3  
 C<sub>46</sub>H<sub>34</sub>Cl<sub>2</sub>N<sub>4</sub>O<sub>6</sub>Re<sub>2</sub>Na:  
 C<sub>46</sub>H<sub>34</sub>Cl<sub>2</sub>N<sub>4</sub>O<sub>6</sub>Re<sub>2</sub>Na<sub>1</sub>  
 p (gss, s /p:40) Chrg 1  
 R: 35000 Res .Pwr .@FWHM

Figure S37. HRMS spectrum of d2-[Re<sub>2</sub>(5b)(CO)<sub>6</sub>Cl<sub>2</sub>]

d1-[Re<sub>2</sub>(6a)(CO)<sub>6</sub>Cl<sub>2</sub>]

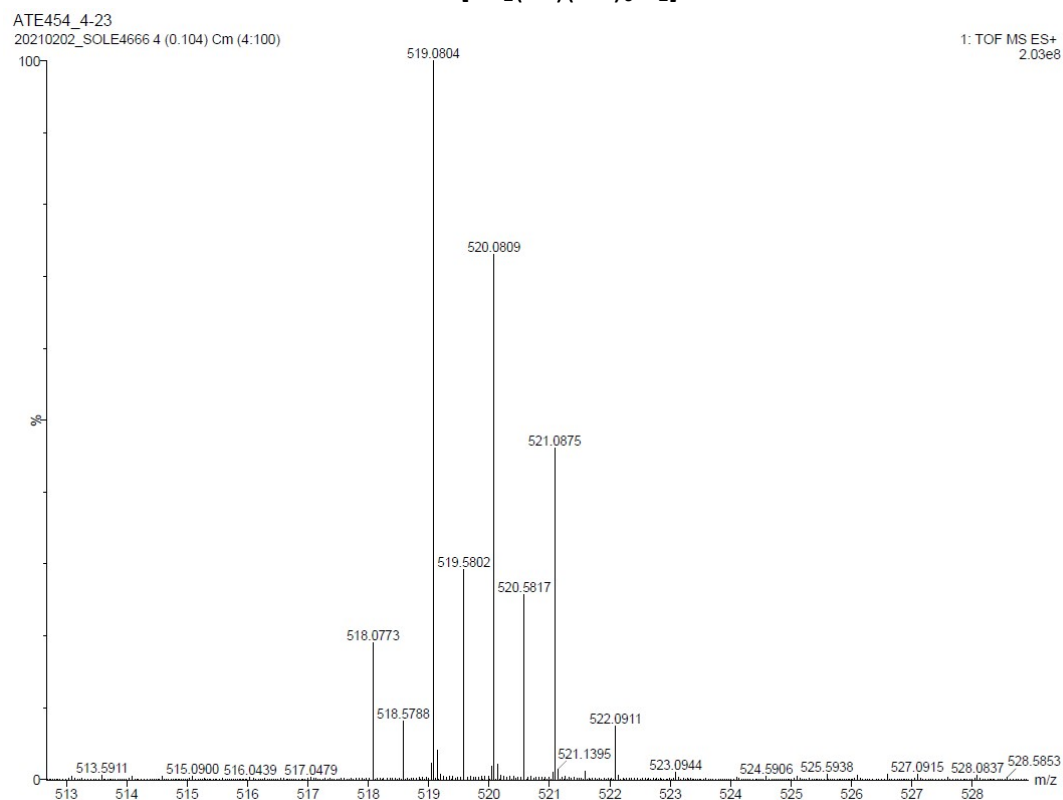

Figure S38. HRMS spectrum of d1-[Re<sub>2</sub>(6a)(CO)<sub>6</sub>Cl<sub>2</sub>]

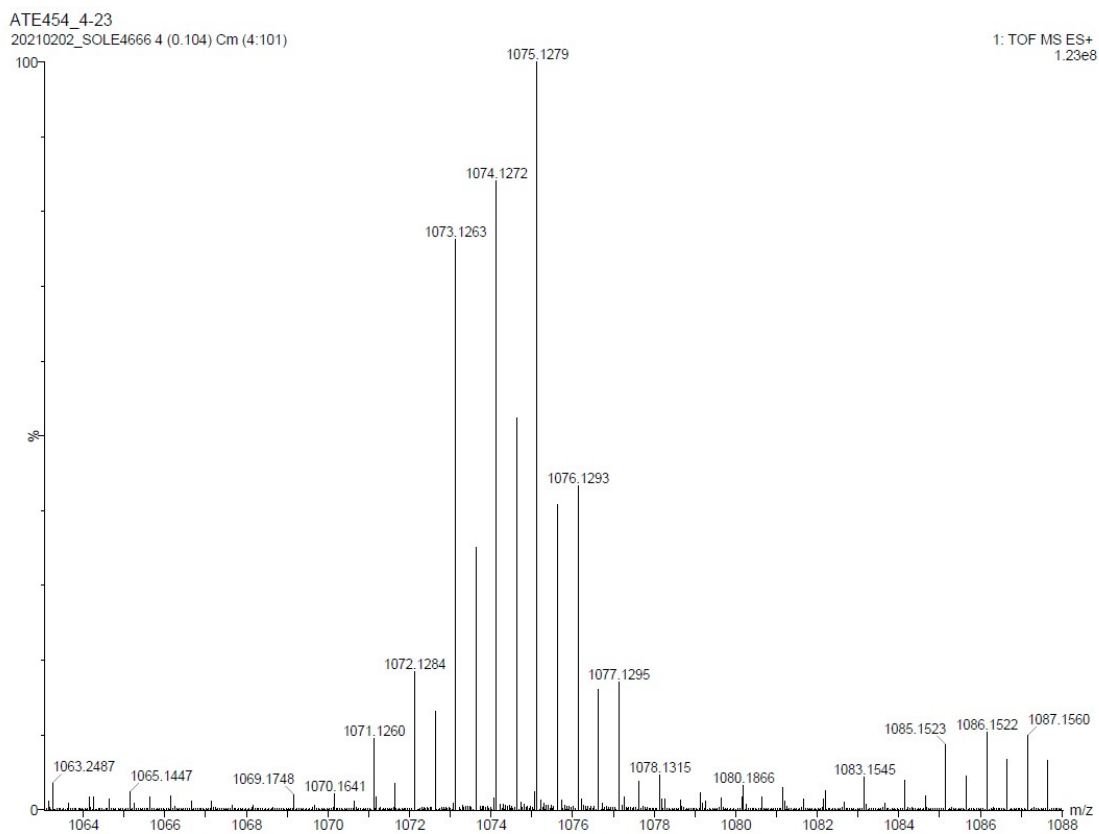

Figure S39. HRMS spectrum of d1-[Re<sub>2</sub>(6a)(CO)<sub>6</sub>Cl<sub>2</sub>]

d2-[Re<sub>2</sub>(6a)(CO)<sub>6</sub>Cl<sub>2</sub>]

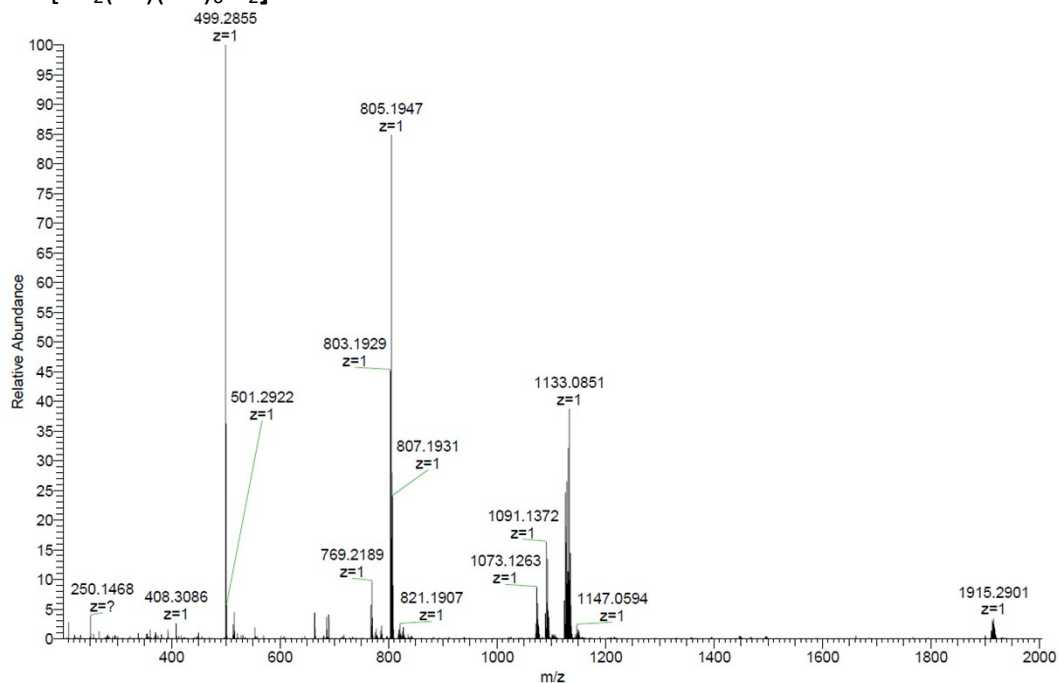

Figure S40. HRMS spectrum of d2-[Re<sub>2</sub>(6a)(CO)<sub>6</sub>Cl<sub>2</sub>]

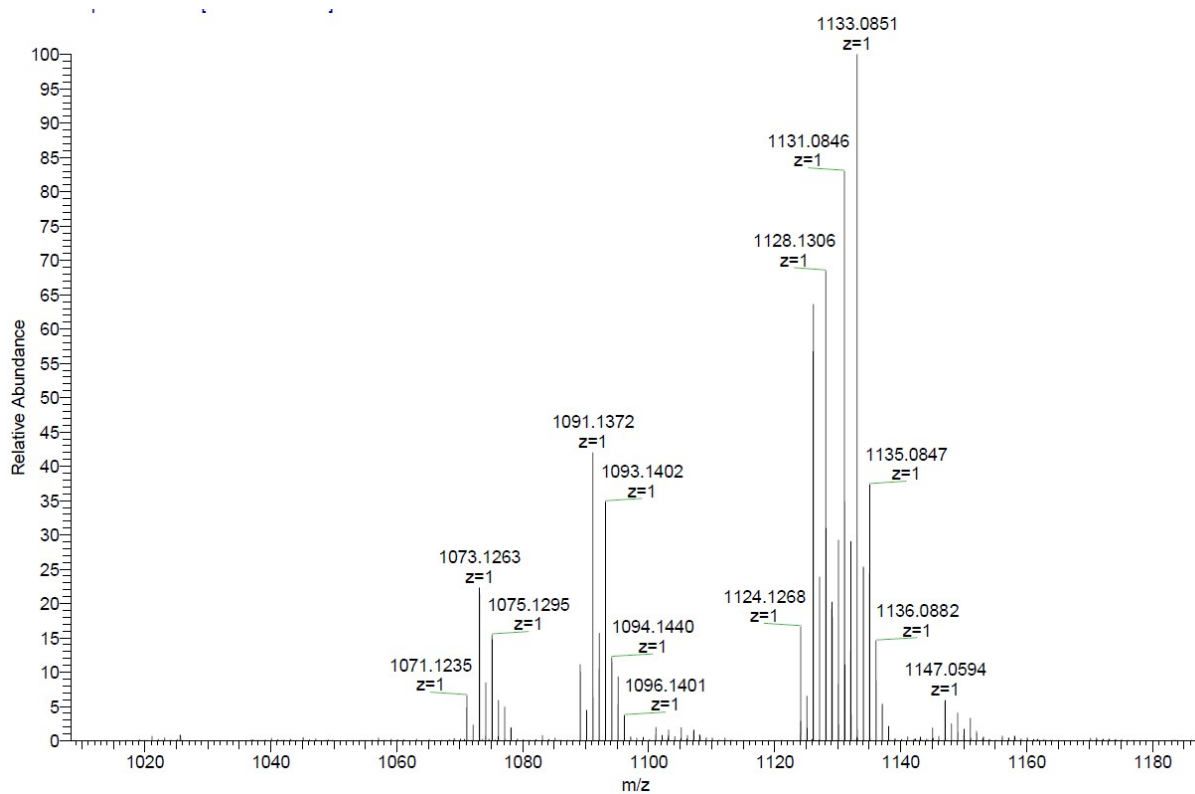

Figure S41. HRMS spectrum of d2-[Re<sub>2</sub>(6a)(CO)<sub>6</sub>Cl<sub>2</sub>]

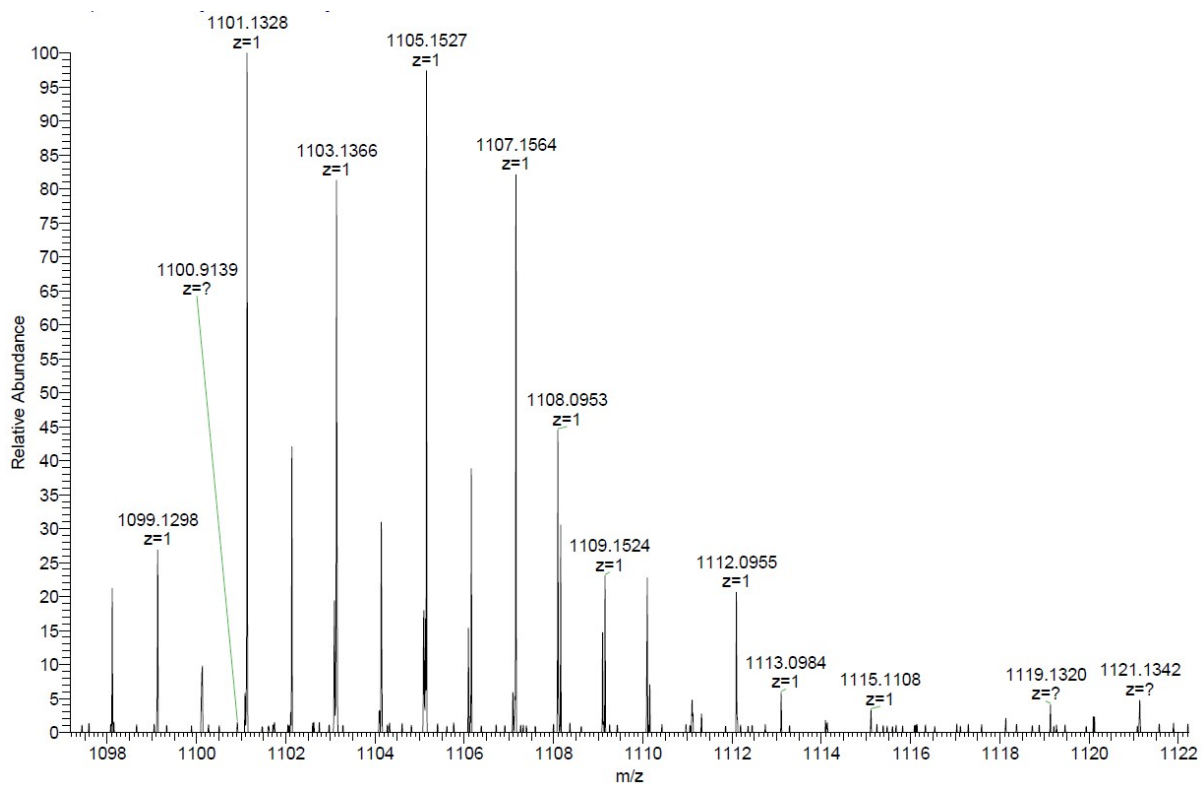

Figure S42. HRMS spectrum of  $d_2$ -[ $Re_2(6a)(CO)_6Cl_2$ ]



d1-[Re<sub>2</sub>(6b)(CO)<sub>6</sub>Cl<sub>2</sub>]

D:\Data\Service\Data\23\_aQEx\_0437

Client:

03/15/23 20:05:53

(+)-HR-ESI-MS

Sample: ATE516-D1

Solvent: MeOH

RT: 0.00 - 1.00

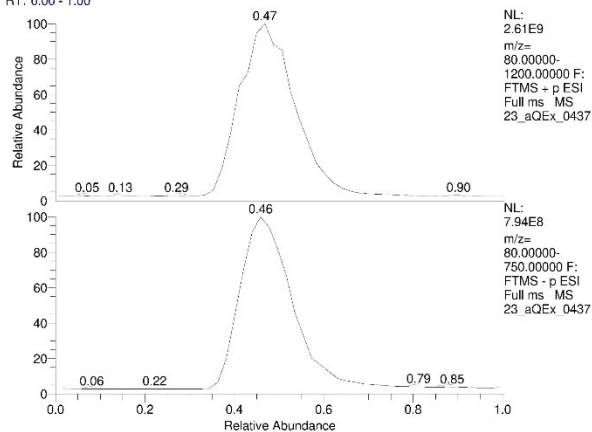

| m/z        | Intensity | Relative | Theo. Mass | Delta (ppm) | RDB equiv. | Composition                                                                                                                 |
|------------|-----------|----------|------------|-------------|------------|-----------------------------------------------------------------------------------------------------------------------------|
| 1133.08394 | 1861129.4 | 100.00   | 1133.08402 | -0.07       | 29.5       | C <sub>44</sub> H <sub>32</sub> O <sub>3</sub> N <sub>4</sub> Cl <sub>1</sub> <sup>37</sup> Cl Na Re <sub>1</sub>           |
|            |           |          | 1133.08374 | 0.17        | 28.0       | C <sub>43</sub> H <sub>33</sub> O <sub>6</sub> N <sub>5</sub> Cl <sub>1</sub> <sup>37</sup> Cl Re <sub>2</sub>              |
|            |           |          | 1133.08423 | -0.26       | 23.5       | C <sub>43</sub> H <sub>36</sub> O <sub>5</sub> N <sub>4</sub> Cl <sub>2</sub> <sup>37</sup> Cl Re <sub>2</sub>              |
|            |           |          | 1133.08317 | 0.68        | 20.0       | C <sub>43</sub> H <sub>39</sub> O <sub>6</sub> N <sub>4</sub> Cl <sub>2</sub> <sup>37</sup> Cl Na Re <sub>2</sub>           |
|            |           |          | 1133.08271 | 1.08        | 23.5       | C <sub>43</sub> H <sub>39</sub> O <sub>7</sub> N <sub>2</sub> Cl <sub>2</sub> <sup>37</sup> Cl <sub>2</sub> Re <sub>2</sub> |
|            |           |          | 1133.08557 | -1.44       | 23.0       | C <sub>43</sub> H <sub>38</sub> O <sub>6</sub> N <sub>4</sub> Cl <sub>2</sub> <sup>37</sup> Cl Re <sub>2</sub>              |
|            |           |          | 1133.08585 | -1.68       | 24.5       | C <sub>43</sub> H <sub>37</sub> O <sub>3</sub> N <sub>2</sub> Cl <sub>2</sub> <sup>37</sup> Cl Na Re <sub>2</sub>           |
|            |           |          | 1133.08182 | 1.87        | 20.5       | C <sub>38</sub> H <sub>37</sub> O <sub>5</sub> N <sub>4</sub> Cl <sub>2</sub> <sup>37</sup> Cl Na Re <sub>2</sub>           |
|            |           |          | 1133.08134 | 2.30        | 25.0       | C <sub>41</sub> H <sub>34</sub> O <sub>6</sub> N <sub>3</sub> Cl <sub>1</sub> <sup>37</sup> Cl Na Re <sub>2</sub>           |
|            |           |          | 1133.08655 | -2.30       | 25.5       | C <sub>41</sub> H <sub>35</sub> O <sub>5</sub> N <sub>4</sub> <sup>37</sup> Cl <sub>2</sub> Na Re <sub>2</sub>              |
|            |           |          | 1133.08088 | 2.70        | 28.5       | C <sub>44</sub> H <sub>34</sub> O <sub>2</sub> N <sub>4</sub> Cl <sub>1</sub> <sup>37</sup> Cl <sub>2</sub> Re <sub>2</sub> |
|            |           |          | 1133.08736 | -3.02       | 24.5       | C <sub>43</sub> H <sub>34</sub> O <sub>6</sub> N <sub>4</sub> Cl <sub>2</sub> Na                                            |

23\_aQEx\_0437 #39-46 RT: 0.39-0.45 AV: 4 SB: 24 0.03-0.24 , 0.70-0.95 NL: 6.48E7  
 T: FTMS + p ESI Full lock ms [200.0000-3000.0000]

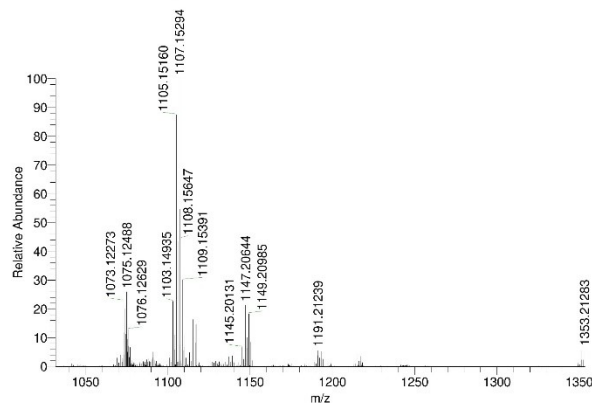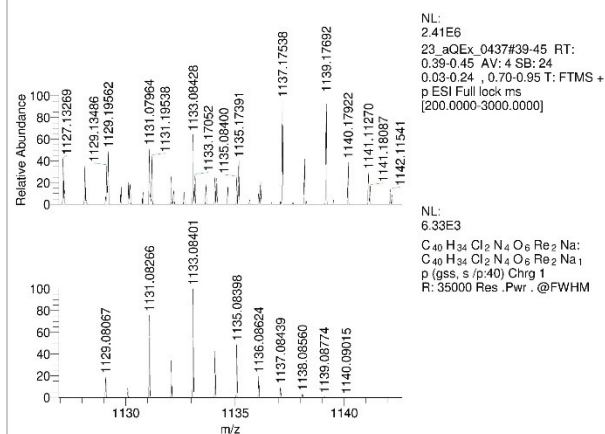

Figure S43. HRMS spectrum of d1-[Re<sub>2</sub>(6b)(CO)<sub>6</sub>Cl<sub>2</sub>]

# d2-[Re<sub>2</sub>(6b)(CO)<sub>6</sub>Cl<sub>2</sub>]

D:\Data\Service\Data\23\_aQEx\_0438  
Client:

03/15/23 20:07:51  
(+)-HR-ESI-MS

Sample: ATE516-D2  
Solvent: MeOH

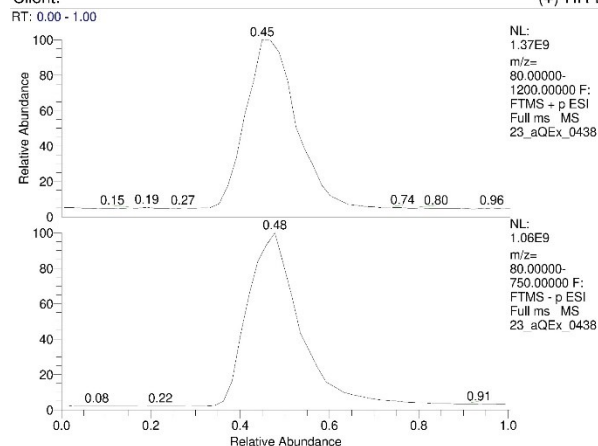

23\_aQEx\_0438#41-53 RT: 0.41-0.53 AV: 7  
SB: 25 0.04-0.25 , 0.72-0.98  
T: FTMS - p ESI Full lock ms [200.0000-3000.0000]  
m/z= 1132.62989-1133.34803

| m/z        | Intensity | Relative | Theo. Mass | Delta (ppm) | RDB equiv. | Composition                                                                                         |
|------------|-----------|----------|------------|-------------|------------|-----------------------------------------------------------------------------------------------------|
| 1133.08367 | 1842539.5 | 100.00   | 1133.08304 | 0.55        | 21.0       | C <sub>45</sub> H <sub>36</sub> O <sub>4</sub> NCl <sub>3</sub> Re <sub>2</sub>                     |
|            |           |          | 1133.08170 | 1.74        | 27.5       | C <sub>45</sub> H <sub>34</sub> O <sub>3</sub> N <sub>2</sub> Cl <sub>3</sub> Re <sub>2</sub>       |
|            |           |          | 1133.08064 | 2.67        | 24.0       | C <sub>45</sub> H <sub>37</sub> O <sub>4</sub> NCl <sub>3</sub> Na<br>Re <sub>2</sub>               |
|            |           |          | 1133.08736 | -3.26       | 24.5       | C <sub>45</sub> H <sub>34</sub> O <sub>6</sub> N <sub>4</sub> Cl <sub>2</sub> Na<br>Re <sub>2</sub> |
|            |           |          | 1133.07929 | 3.86        | 24.5       | C <sub>45</sub> H <sub>35</sub> O <sub>3</sub> N <sub>4</sub> Cl <sub>3</sub> Na<br>Re <sub>2</sub> |

23\_aQEx\_0438 #40-54 RT: 0.41-0.53 AV: 7 SB: 24 0.03-0.24 , 0.70-0.95 NL: 5.24E7  
T: FTMS + p ESI Full lock ms [200.0000-3000.0000]

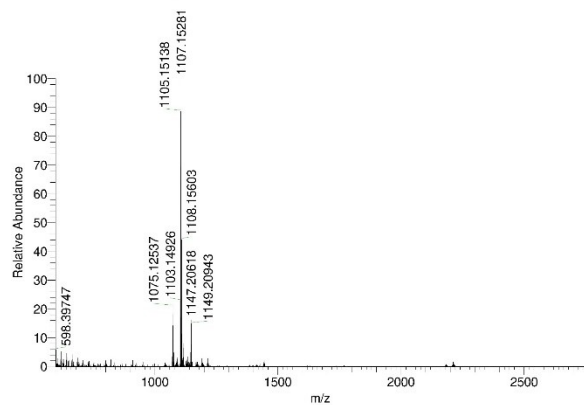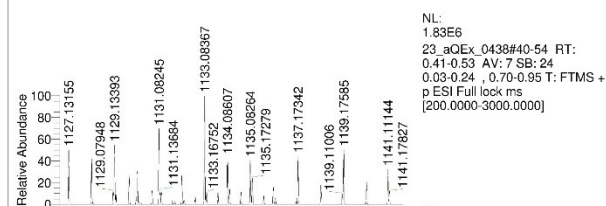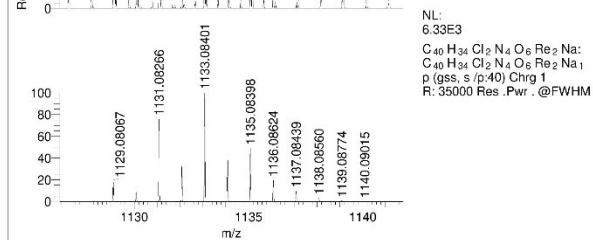

Figure S44. HRMS spectrum of d2-[Re<sub>2</sub>(6b)(CO)<sub>6</sub>Cl<sub>2</sub>]

IR spectra

d1-[Re<sub>2</sub>(5a)(CO)<sub>6</sub>Cl<sub>2</sub>]

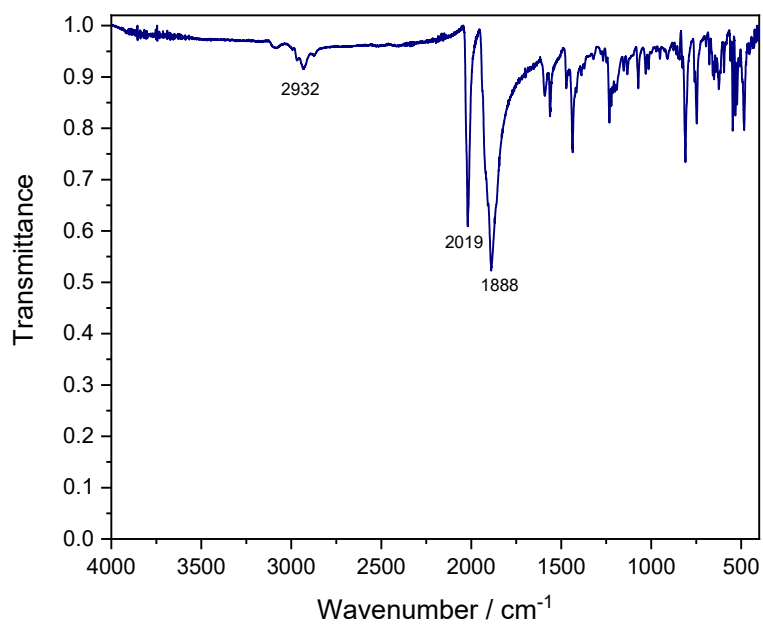

Figure S45. IR spectrum of d1-[Re<sub>2</sub>(5a)(CO)<sub>6</sub>Cl<sub>2</sub>]

d2-[Re<sub>2</sub>(5a)(CO)<sub>6</sub>Cl<sub>2</sub>]

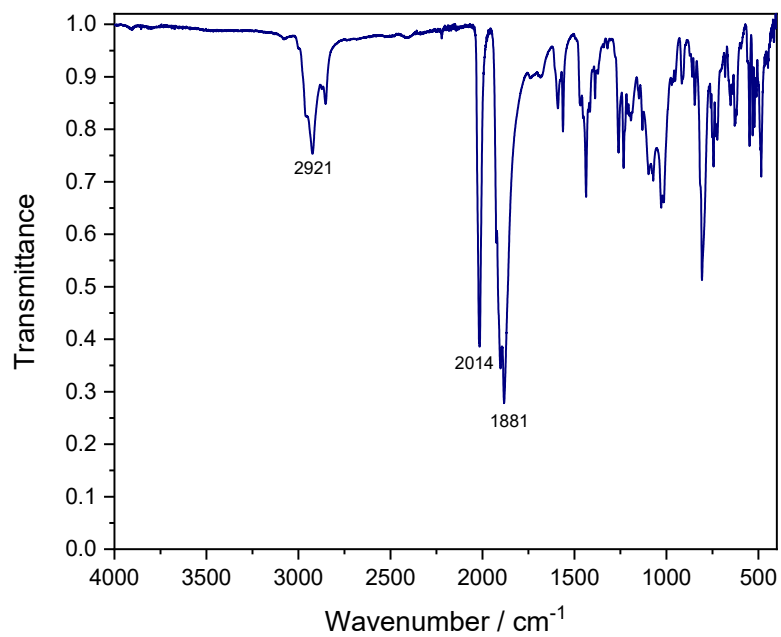

Figure S46. IR spectrum of d2-[Re<sub>2</sub>(5a)(CO)<sub>6</sub>Cl<sub>2</sub>]

d1-[Re<sub>2</sub>(**5b**)(CO)<sub>6</sub>Cl<sub>2</sub>]

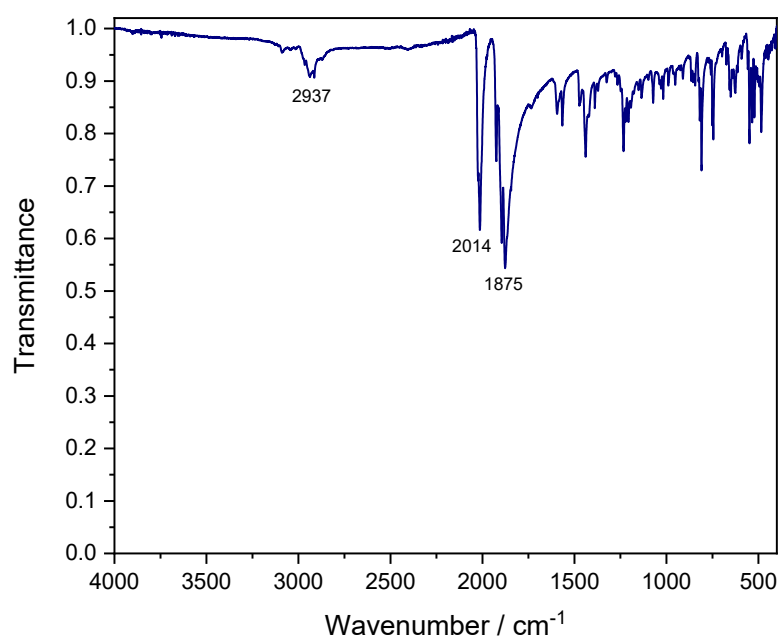

Figure S47. IR spectrum of d1-[Re<sub>2</sub>(**5b**)(CO)<sub>6</sub>Cl<sub>2</sub>]

d2-[Re<sub>2</sub>(**5b**)(CO)<sub>6</sub>Cl<sub>2</sub>]

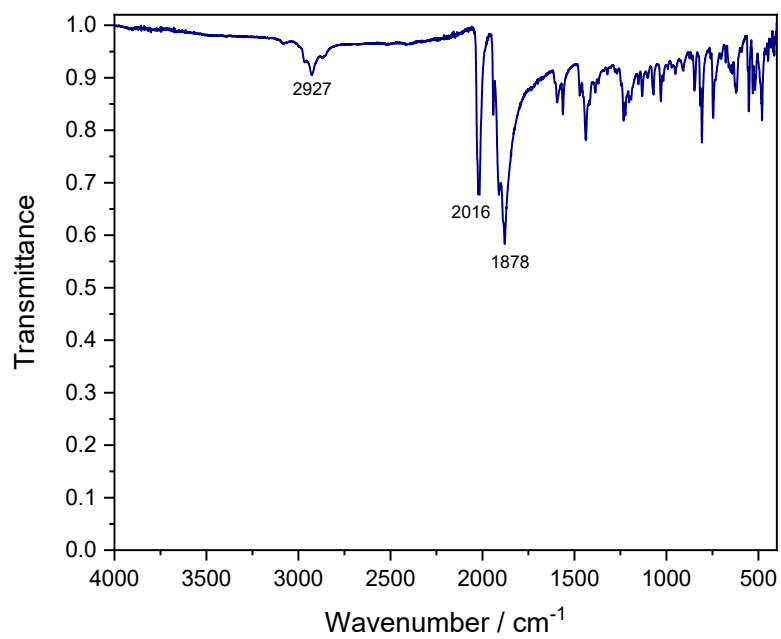

Figure S48. IR spectrum of d2-[Re<sub>2</sub>(**5b**)(CO)<sub>6</sub>Cl<sub>2</sub>]

d1-[Re<sub>2</sub>(**6a**)(CO)<sub>6</sub>Cl<sub>2</sub>]

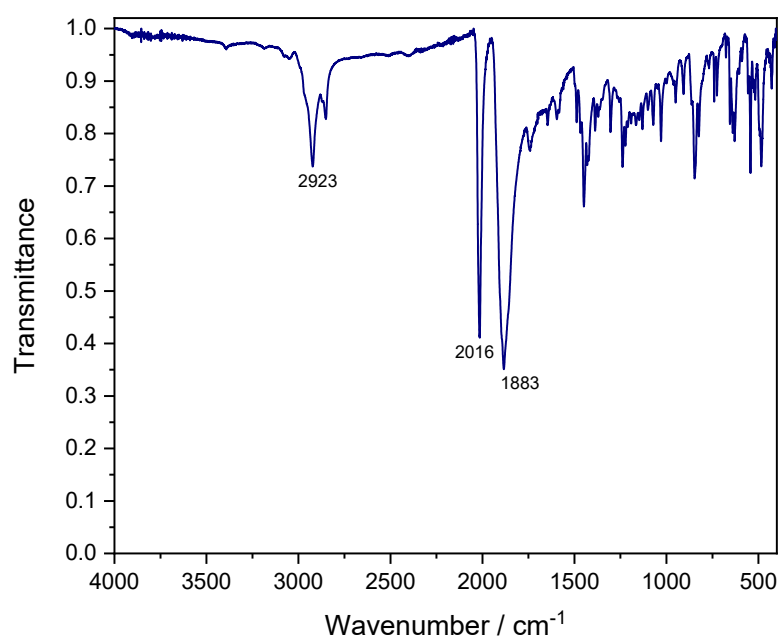

Figure S49. IR spectrum of d1-[Re<sub>2</sub>(**6a**)(CO)<sub>6</sub>Cl<sub>2</sub>]

d2-[Re<sub>2</sub>(**6a**)(CO)<sub>6</sub>Cl<sub>2</sub>]

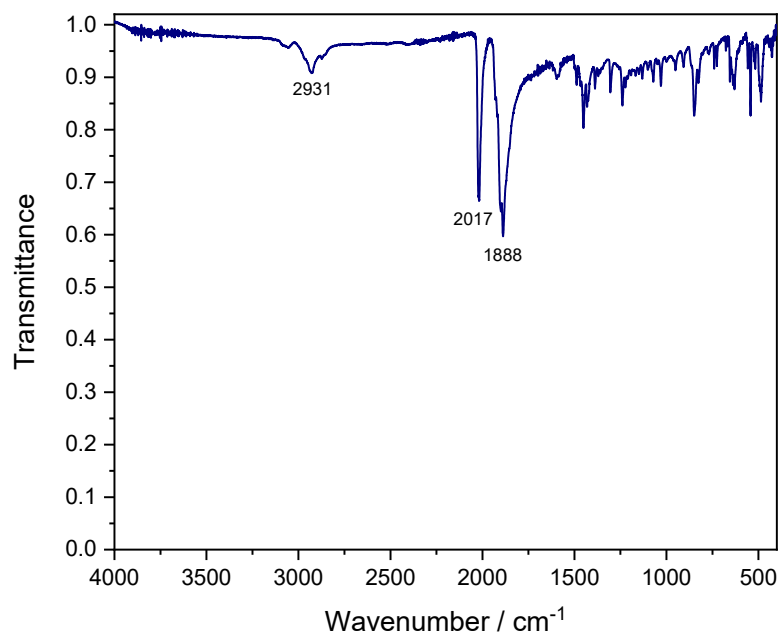

Figure S50. IR spectrum of d2-[Re<sub>2</sub>(**6a**)(CO)<sub>6</sub>Cl<sub>2</sub>]

d1-[Re<sub>2</sub>(**6b**)(CO)<sub>6</sub>Cl<sub>2</sub>]

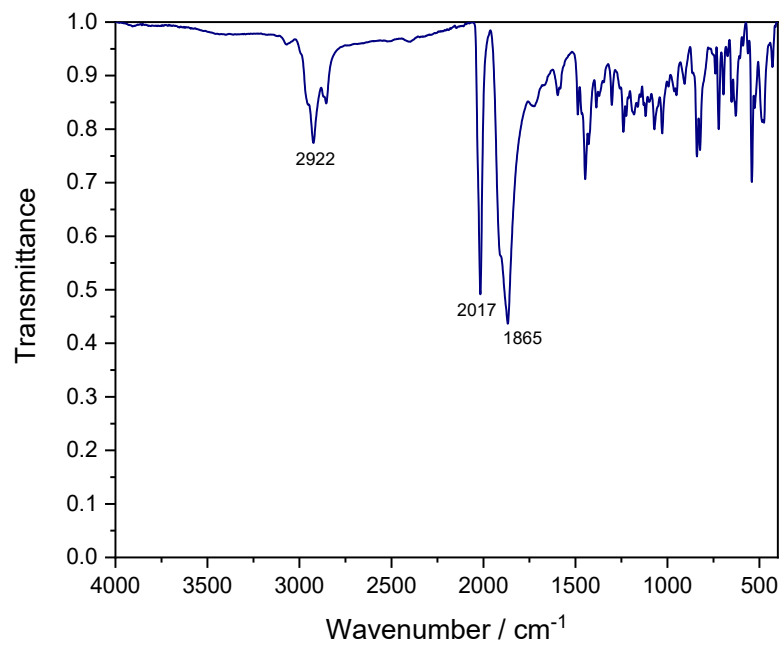

Figure S51. IR spectrum of d1-[Re<sub>2</sub>(**6b**)(CO)<sub>6</sub>Cl<sub>2</sub>]

d2-[Re<sub>2</sub>(**6b**)(CO)<sub>6</sub>Cl<sub>2</sub>]

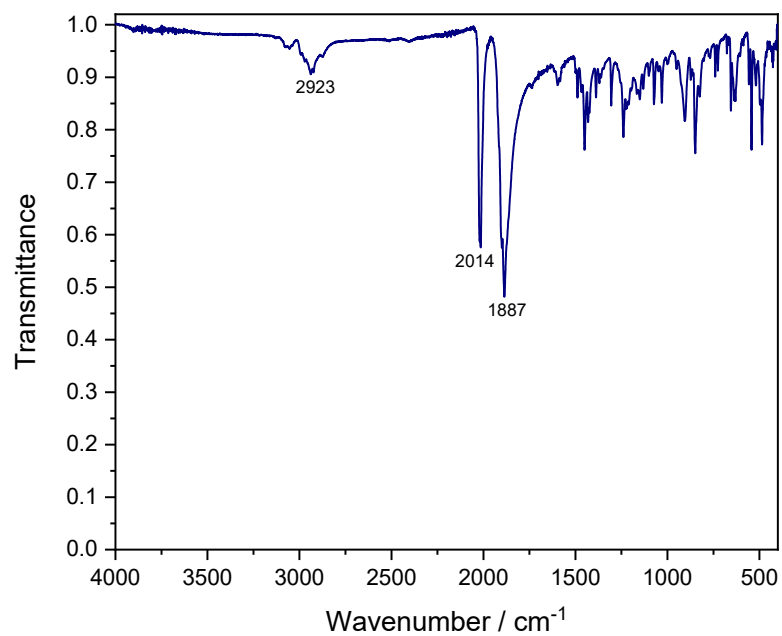

Figure S52. IR spectrum of d2-[Re<sub>2</sub>(**6b**)(CO)<sub>6</sub>Cl<sub>2</sub>]

## CD spectra

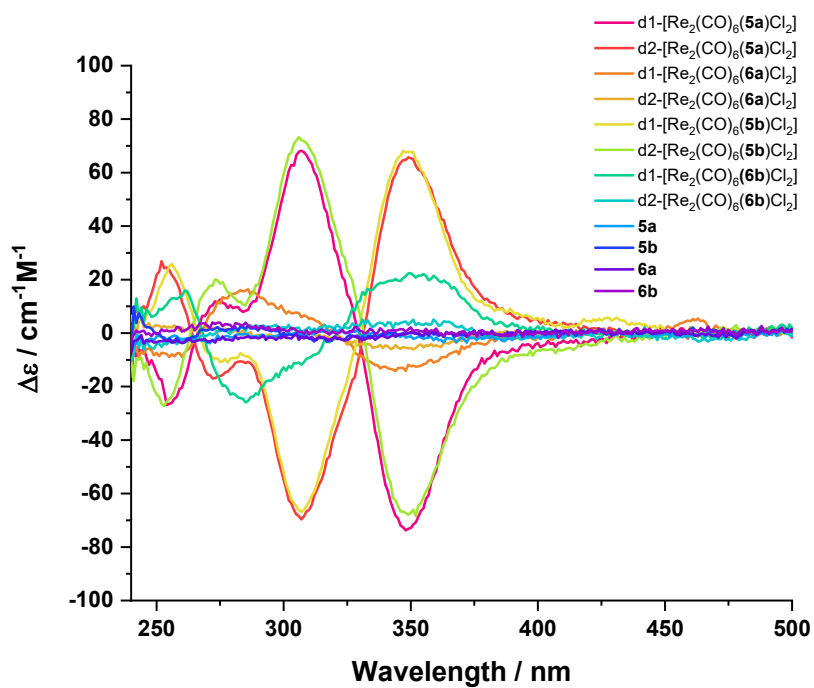

Figure S53. CD spectra of the ligands and different stereoisomers (0.005 mM in CHCl<sub>3</sub>)

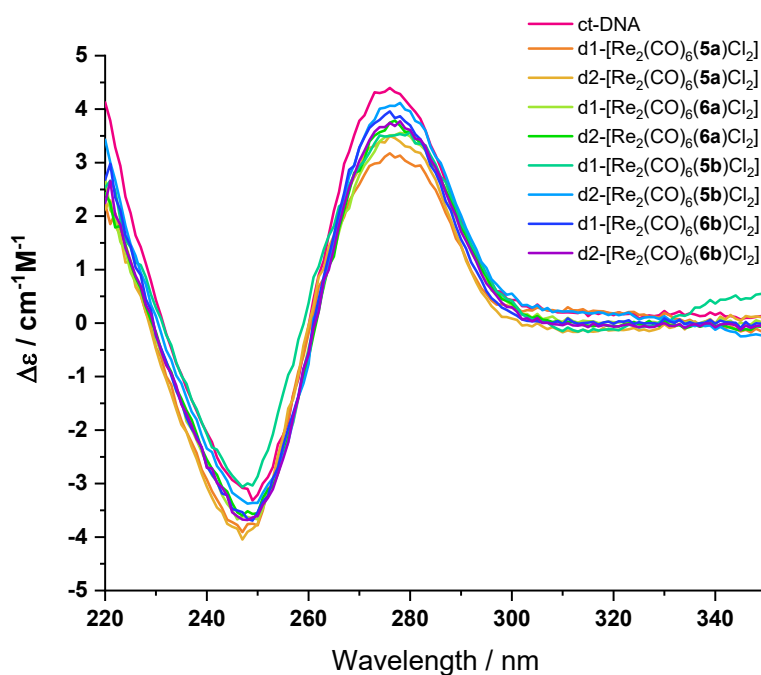

Figure S54. CD spectra of calf thymus DNA (100  $\mu\text{M}$ ) in the presence of different diastereomers (5  $\mu\text{M}$ ) in H<sub>2</sub>O

## Photophysical characterisation

d1-[Re<sub>2</sub>(**5a**)(CO)<sub>6</sub>Cl<sub>2</sub>]

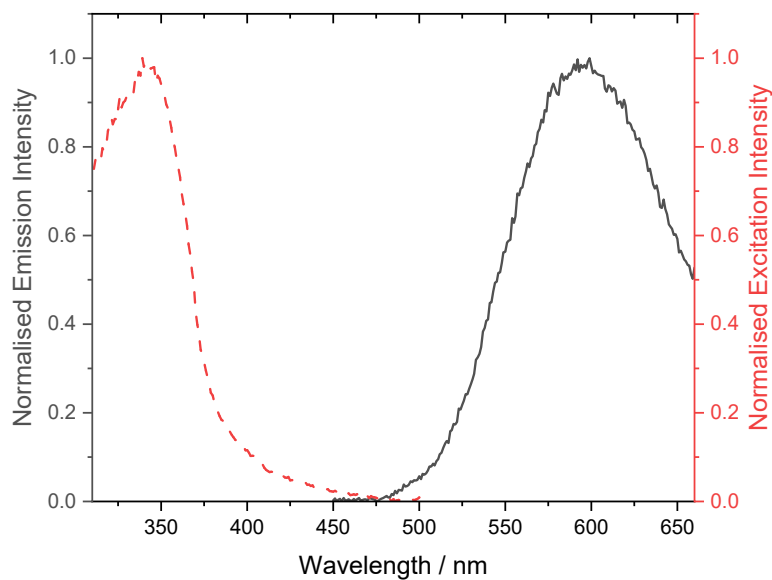

Figure S55. Emission (dark grey) and excitation spectra (red, dashed) of d1-[Re<sub>2</sub>(**5a**)(CO)<sub>6</sub>Cl<sub>2</sub>] in CH<sub>2</sub>Cl<sub>2</sub>, c = 0.0025 mM, λ<sub>ex</sub> = 342 nm

d2-[Re<sub>2</sub>(**5a**)(CO)<sub>6</sub>Cl<sub>2</sub>]

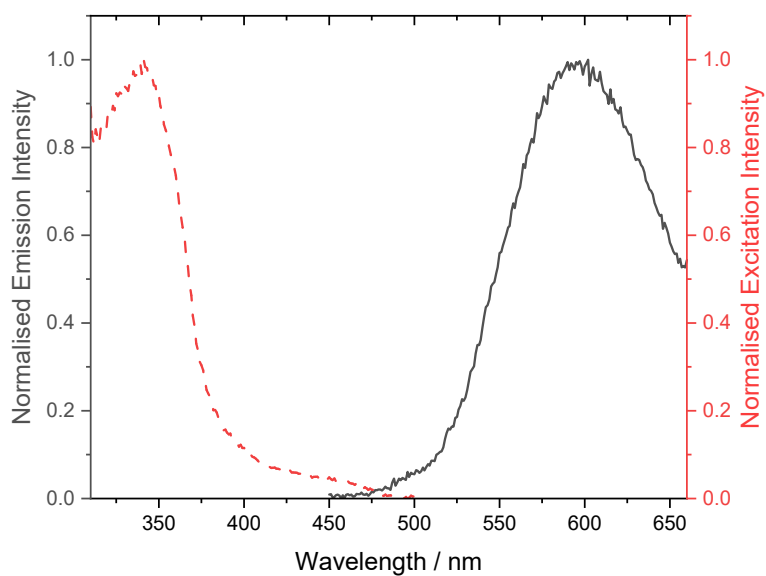

Figure S56. Emission (dark grey) and excitation spectra (red, dashed) of d2-[Re<sub>2</sub>(**5a**)(CO)<sub>6</sub>Cl<sub>2</sub>] in CH<sub>2</sub>Cl<sub>2</sub>, c = 0.0025 mM, λ<sub>ex</sub> = 342 nm



d1-[Re<sub>2</sub>(**6a**)(CO)<sub>6</sub>Cl<sub>2</sub>]

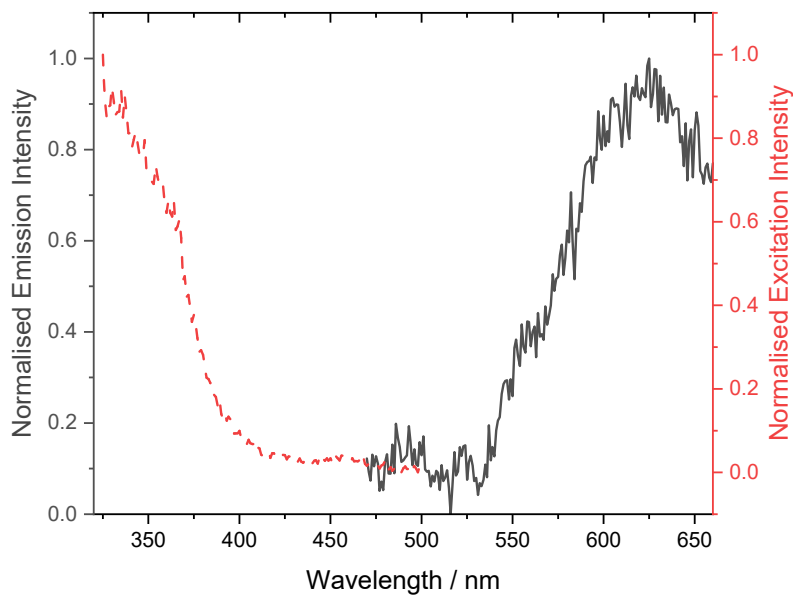

Figure S57. Emission (dark grey) and excitation spectra (red, dashed) of d1-[Re<sub>2</sub>(**6a**)(CO)<sub>6</sub>Cl<sub>2</sub>] in CH<sub>2</sub>Cl<sub>2</sub>, c = 0.0025 mM, λ<sub>ex</sub> = 350 nm

d2-[Re<sub>2</sub>(**6a**)(CO)<sub>6</sub>Cl<sub>2</sub>]

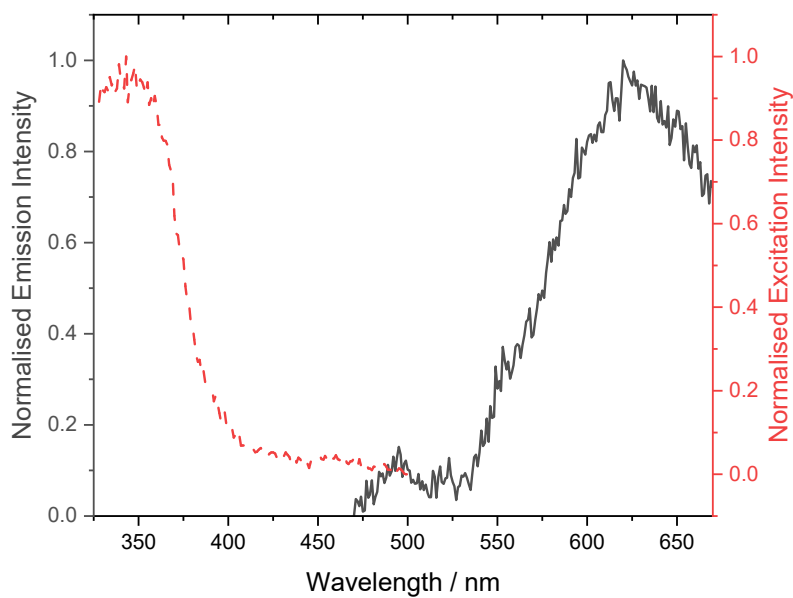

Figure S58. Emission (dark grey) and excitation spectra (red, dashed) of d2-[Re<sub>2</sub>(**6a**)(CO)<sub>6</sub>Cl<sub>2</sub>] in CH<sub>2</sub>Cl<sub>2</sub>, c = 0.0025 mM, λ<sub>ex</sub> = 350 nm

d1-[Re<sub>2</sub>(**5b**)(CO)<sub>6</sub>Cl<sub>2</sub>]

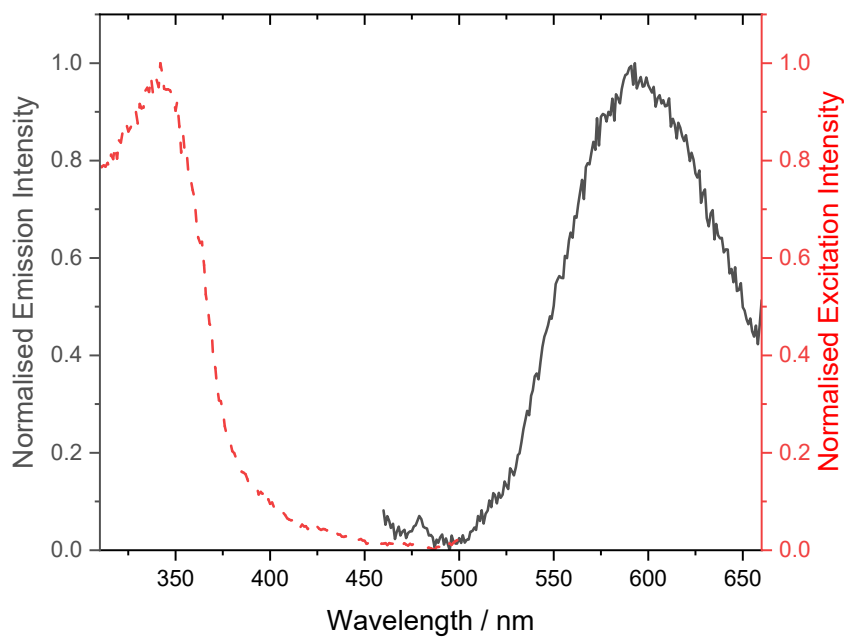

Figure S59. Emission (dark grey) and excitation spectra (red, dashed) of d1-[Re<sub>2</sub>(**5b**)(CO)<sub>6</sub>Cl<sub>2</sub>] in CH<sub>2</sub>Cl<sub>2</sub>, c = 0.0025 mM, λ<sub>ex</sub> = 342 nm

d2-[Re<sub>2</sub>(**5b**)(CO)<sub>6</sub>Cl<sub>2</sub>]

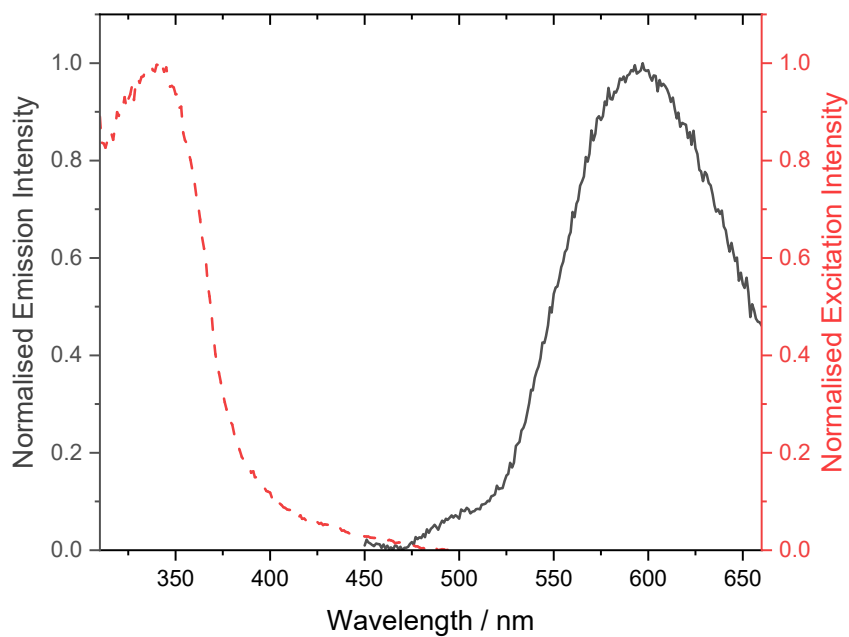

Figure S60. Emission (dark grey) and excitation spectra (red, dashed) of d2-[Re<sub>2</sub>(**5b**)(CO)<sub>6</sub>Cl<sub>2</sub>] in CH<sub>2</sub>Cl<sub>2</sub>, c = 0.0025 mM, λ<sub>ex</sub> = 342 nm

d1-[Re<sub>2</sub>(**6b**)(CO)<sub>6</sub>Cl<sub>2</sub>]

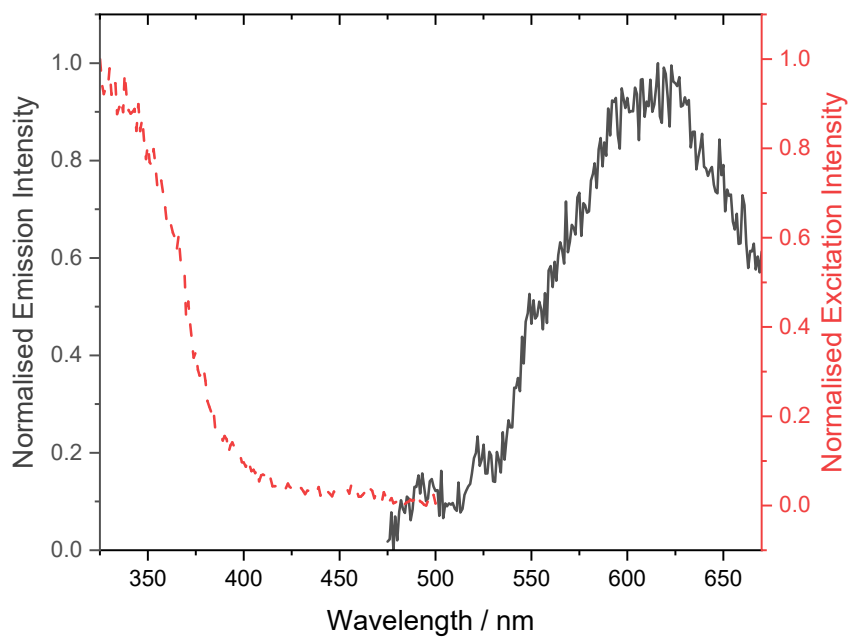

Figure S61. Emission (dark grey) and excitation spectra (red, dashed) of d1-[Re<sub>2</sub>(**6b**)(CO)<sub>6</sub>Cl<sub>2</sub>] in CH<sub>2</sub>Cl<sub>2</sub>, c = 0.0025 mM,  $\lambda_{ex}$  = 350 nm

d2-[Re<sub>2</sub>(**6b**)(CO)<sub>6</sub>Cl<sub>2</sub>]

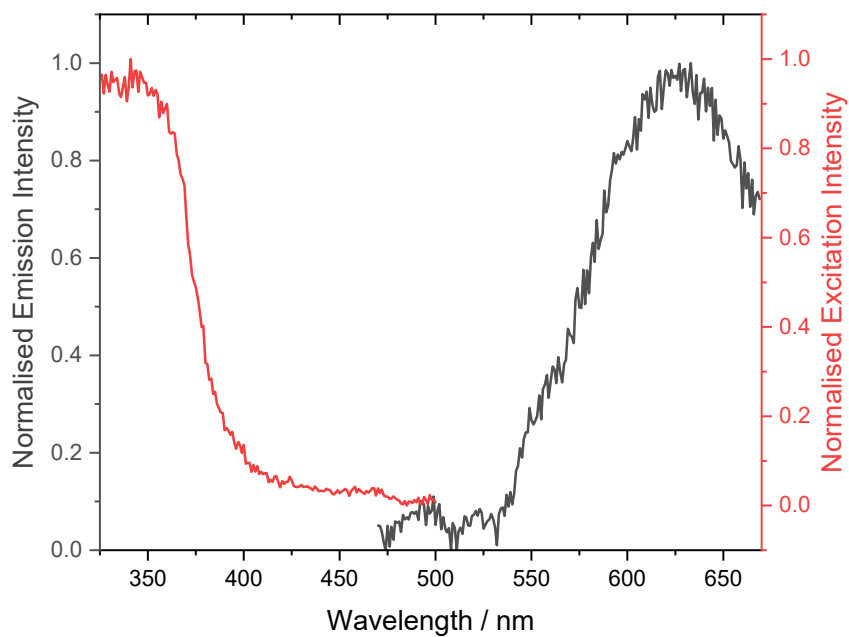

Figure S62. Emission (dark grey) and excitation spectra (red, dashed) of d2-[Re<sub>2</sub>(**6b**)(CO)<sub>6</sub>Cl<sub>2</sub>] in CH<sub>2</sub>Cl<sub>2</sub>, c = 0.0025 mM,  $\lambda_{ex}$  = 350 nm

Table S1. Quantum yield values for the complexes, in CH<sub>2</sub>Cl<sub>2</sub>

| Compound                                                             | QY (%) |
|----------------------------------------------------------------------|--------|
| d1-[Re <sub>2</sub> ( <b>5a</b> )(CO) <sub>6</sub> Cl <sub>2</sub> ] | 3.7    |
| d2-[Re <sub>2</sub> ( <b>5a</b> )(CO) <sub>6</sub> Cl <sub>2</sub> ] | 5.4    |
| d1-[Re <sub>2</sub> ( <b>6a</b> )(CO) <sub>6</sub> Cl <sub>2</sub> ] | 0.6    |
| d2-[Re <sub>2</sub> ( <b>6a</b> )(CO) <sub>6</sub> Cl <sub>2</sub> ] | 0.6    |
| d1-[Re <sub>2</sub> ( <b>5b</b> )(CO) <sub>6</sub> Cl <sub>2</sub> ] | 3.2    |
| d2-[Re <sub>2</sub> ( <b>5b</b> )(CO) <sub>6</sub> Cl <sub>2</sub> ] | 5.2    |
| d1-[Re <sub>2</sub> ( <b>6b</b> )(CO) <sub>6</sub> Cl <sub>2</sub> ] | 0.6    |
| d2-[Re <sub>2</sub> ( <b>6b</b> )(CO) <sub>6</sub> Cl <sub>2</sub> ] | 0.6    |

### Docking calculations

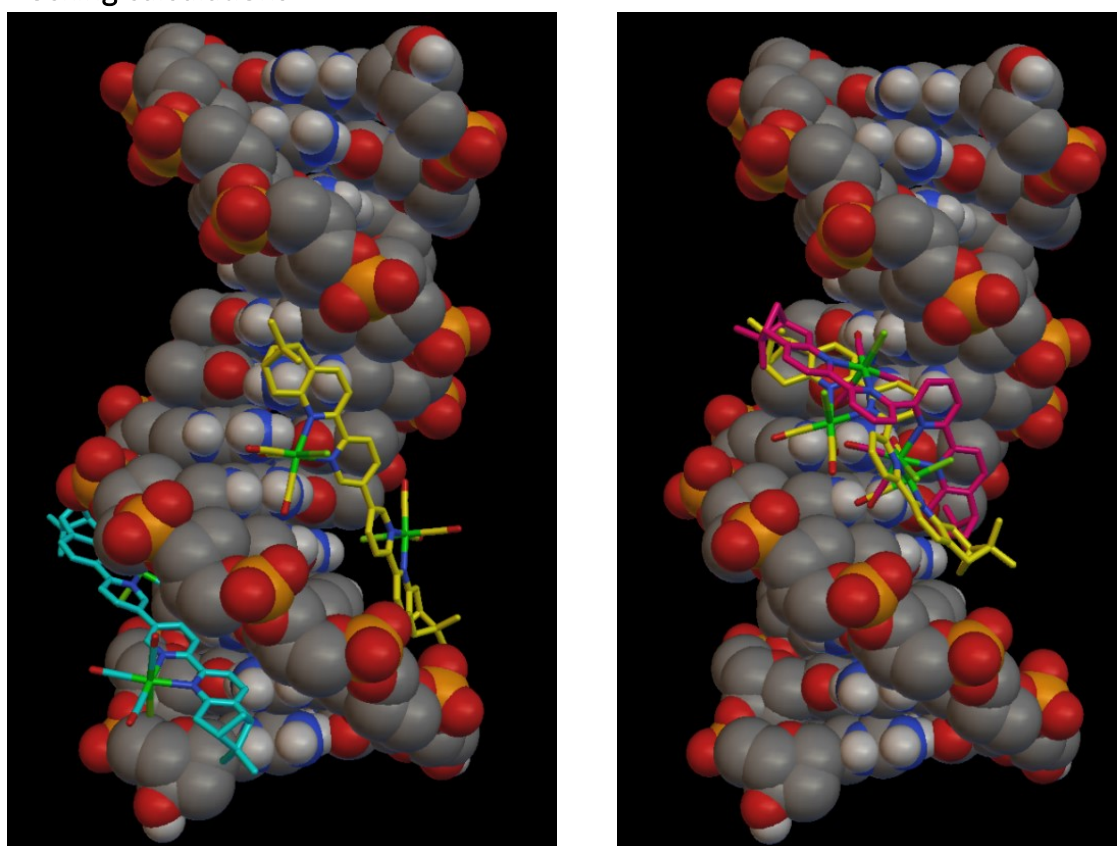

Figure S63. Lowest calculated energy poses of d1- and d2-[Re<sub>2</sub>(**6a**)(CO)<sub>6</sub>Cl<sub>2</sub>] (left) and d1- and d2-[Re<sub>2</sub>(**5a**)(CO)<sub>6</sub>Cl<sub>2</sub>] with double stranded (d(CpGpCpGpApApTpTpCpGpCpG) dodecamer.

## Biological data

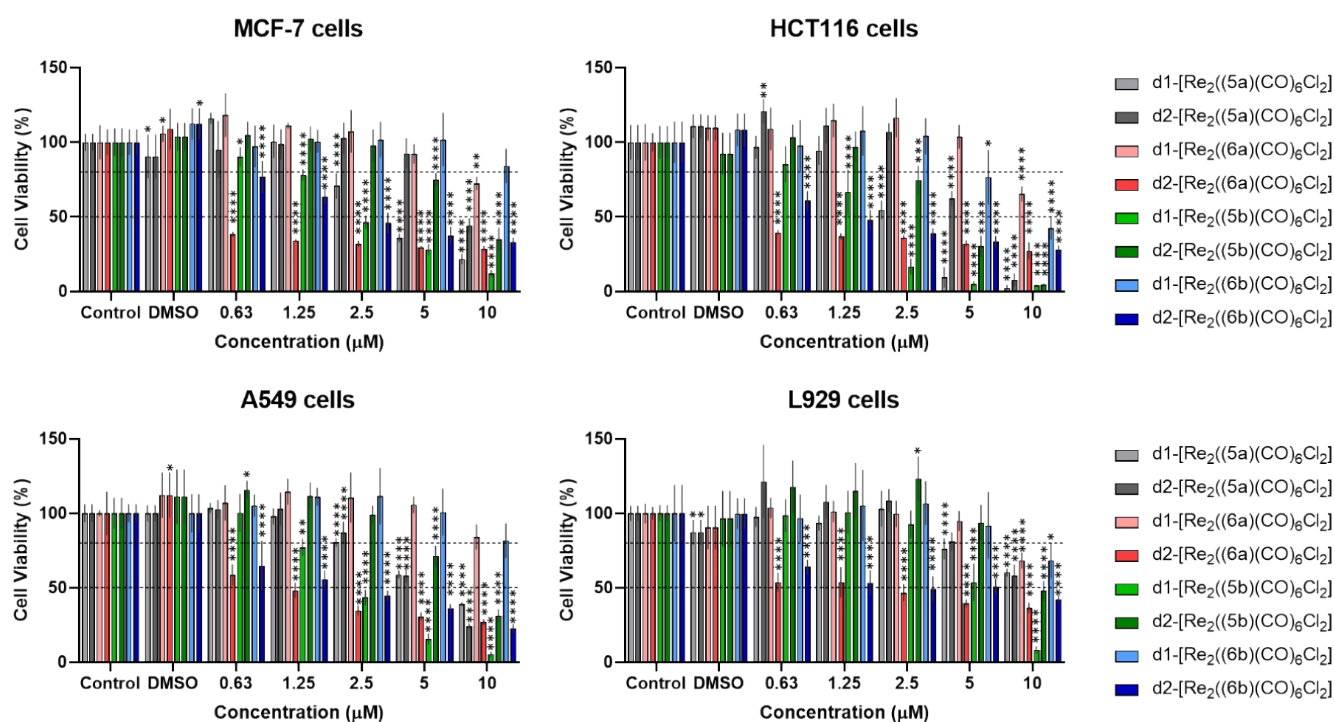

Figure S64. Cytotoxicity graphs of the complexes on MCF-7, HCT116, A549 and L929 cells.

## ICP-MS measurements

Table S2. Re amount found in the cells, as determined by ICP-MS

| Sample name                                                 | Re, ng/mg | RSD, % |
|-------------------------------------------------------------|-----------|--------|
| d1-[Re <sub>2</sub> (CO) <sub>6</sub> (6a)Cl <sub>2</sub> ] | 11.14     | 2.9%   |
| d2-[Re <sub>2</sub> (CO) <sub>6</sub> (6a)Cl <sub>2</sub> ] | 200.45    | 2.6%   |
| d1-[Re <sub>2</sub> (CO) <sub>6</sub> (6b)Cl <sub>2</sub> ] | 7.43      | 3.2%   |
| d2-[Re <sub>2</sub> (CO) <sub>6</sub> (6b)Cl <sub>2</sub> ] | 192.81    | 2.00%  |
| control                                                     | 2.00      | 13.4%  |

## Crystallographic data

### Inter-and intramolecular interactions in the solid state

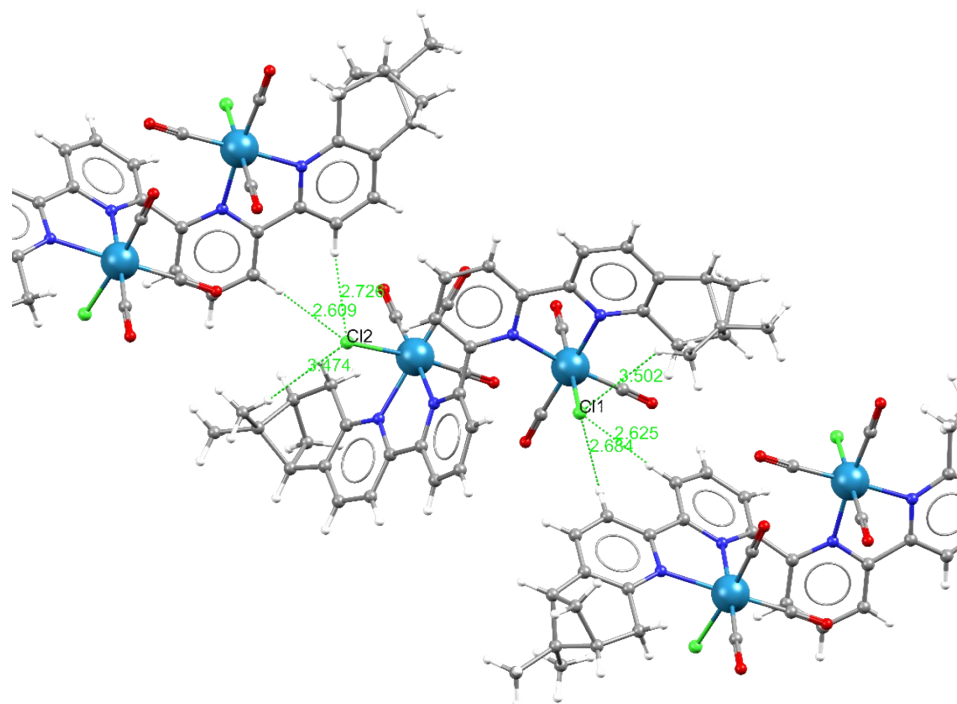

Figure S65. Intra-and intermolecular interactions in the single crystal structure of  $d1\text{-[Re}_2(5a)(\text{CO})_6\text{Cl}_2]$

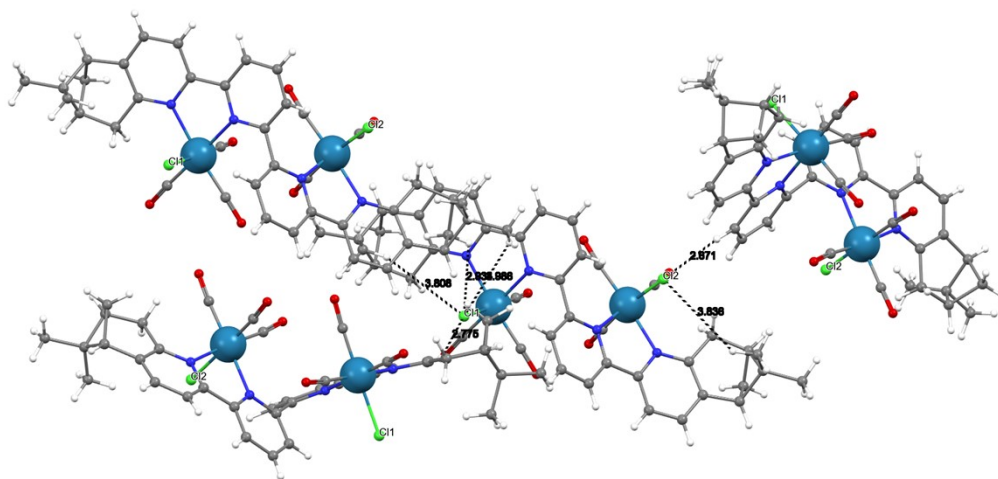

Figure S66. Intra-and intermolecular interactions in the single crystal structure of  $d1\text{-[Re}_2(5b)(\text{CO})_6\text{Cl}_2]$

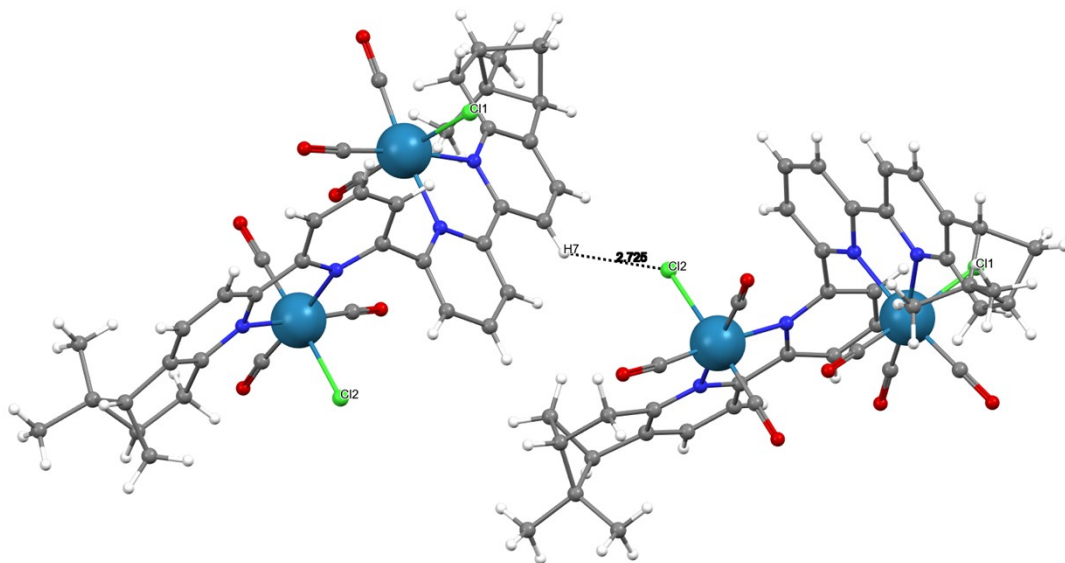

Figure S67. Intermolecular interactions in the single crystal structure of  $d2\text{-[Re}_2\text{(5a)(CO)}_6\text{Cl}_2\text{]}$

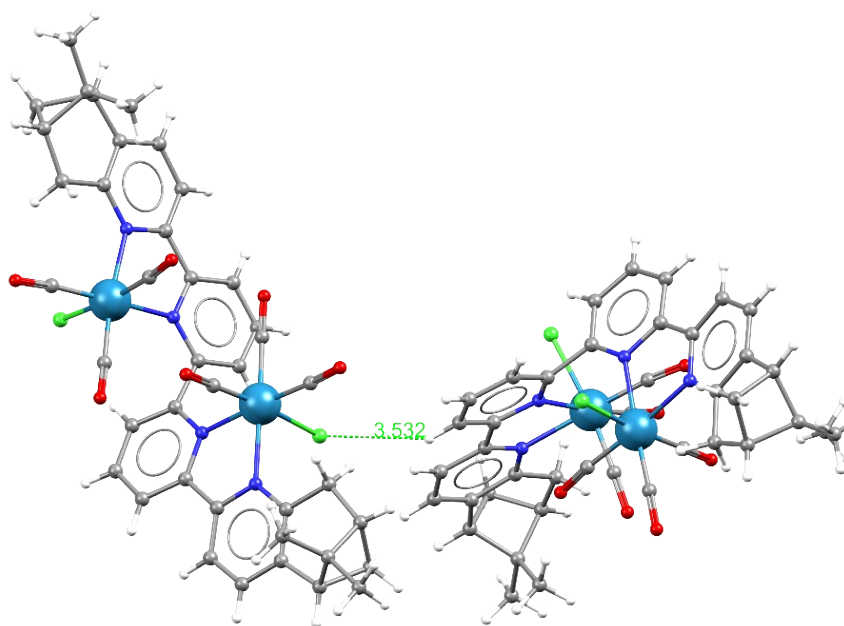

Figure S68. Intermolecular interactions in the single crystal structure of  $d2\text{-[Re}_2\text{(5b)(CO)}_6\text{Cl}_2\text{]}$





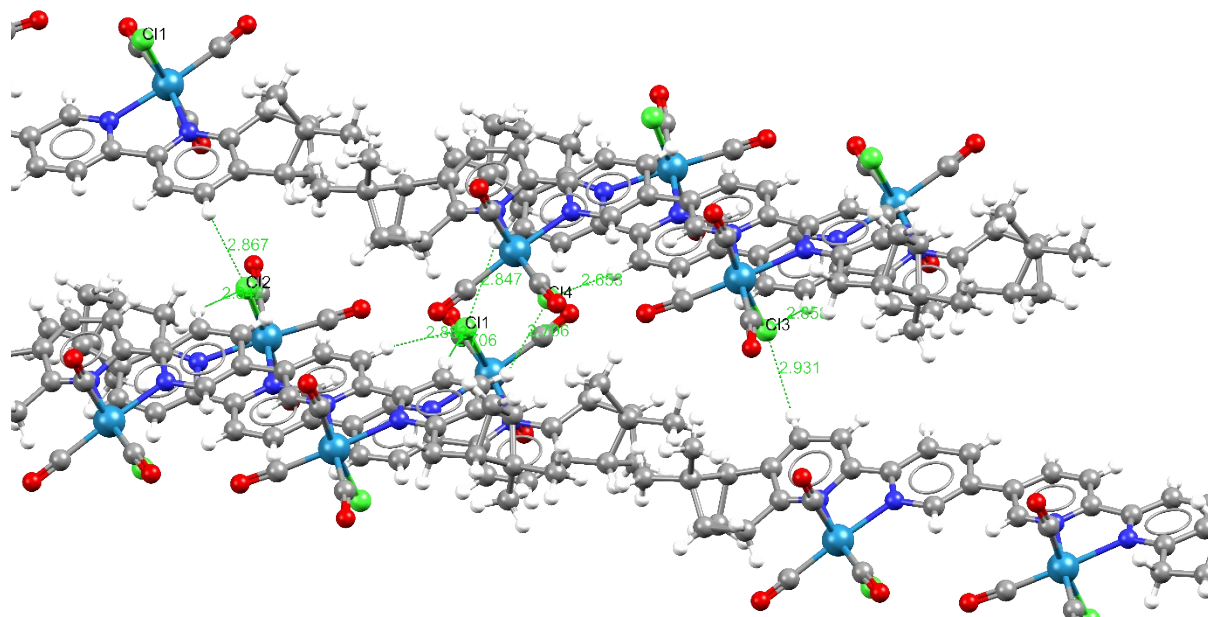

Figure S72. Intra- and intermolecular interactions in the single crystal structure of d<sub>2</sub>-[Re<sub>2</sub>(6b)(CO)<sub>6</sub>Cl<sub>2</sub>]

## X-Ray tables

## 6a/b

| Identification code                         | 6a                                                               | 6b                                                               |
|---------------------------------------------|------------------------------------------------------------------|------------------------------------------------------------------|
| Empirical formula                           | C <sub>34</sub> H <sub>34</sub> N <sub>4</sub>                   | C <sub>34</sub> H <sub>34</sub> N <sub>4</sub>                   |
| CCDC number                                 | 2310572                                                          | 2366457                                                          |
| Formula weight                              | 498.65                                                           | 498.65                                                           |
| Temperature/K                               | 200(2)                                                           | 250(2)                                                           |
| Crystal system                              | monoclinic                                                       | monoclinic                                                       |
| Space group                                 | P2 <sub>1</sub>                                                  | P2 <sub>1</sub>                                                  |
| a/Å                                         | 14.2664(9)                                                       | 14.2355(4)                                                       |
| b/Å                                         | 6.1555(3)                                                        | 6.17310(10)                                                      |
| c/Å                                         | 15.5307(10)                                                      | 15.5568(4)                                                       |
| α/°                                         | 90                                                               | 90                                                               |
| β/°                                         | 100.364(5)                                                       | 100.451(2)                                                       |
| γ/°                                         | 90                                                               | 90                                                               |
| Volume/Å <sup>3</sup>                       | 1341.60(14)                                                      | 1344.41(6)                                                       |
| Z                                           | 2                                                                | 2                                                                |
| ρ <sub>calc</sub> /g/cm <sup>3</sup>        | 1.234                                                            | 1.232                                                            |
| μ/mm <sup>-1</sup>                          | 0.562                                                            | 0.561                                                            |
| F(000)                                      | 532.0                                                            | 532.0                                                            |
| Crystal size/mm <sup>3</sup>                | 0.34 × 0.16 × 0.06                                               | 0.36 × 0.15 × 0.03                                               |
| Radiation                                   | CuKα (λ = 1.54186)                                               | CuKα (λ = 1.54186)                                               |
| 2θ range for data collection/°              | 6.298 to 135.884                                                 | 9.304 to 138.714                                                 |
| Index ranges                                | -17 ≤ h ≤ 16, -6 ≤ k ≤ 6,<br>-18 ≤ l ≤ 18                        | -16 ≤ h ≤ 17, -7 ≤ k ≤ 5, -18 ≤<br>l ≤ 18                        |
| Reflections collected                       | 18057                                                            | 28983                                                            |
| Independent reflections                     | 4689 [R <sub>int</sub> = 0.0534,<br>R <sub>sigma</sub> = 0.0325] | 3648 [R <sub>int</sub> = 0.0602, R <sub>sigma</sub> =<br>0.0322] |
| Data/restraints/parameters                  | 4689/1/348                                                       | 3648/1/347                                                       |
| Goodness-of-fit on F <sup>2</sup>           | 1.077                                                            | 1.039                                                            |
| Final R indexes [I ≥ 2σ (I)]                | R <sub>1</sub> = 0.0943, wR <sub>2</sub> =<br>0.2092             | R <sub>1</sub> = 0.0642, wR <sub>2</sub> = 0.1642                |
| Final R indexes [all data]                  | R <sub>1</sub> = 0.1484, wR <sub>2</sub> =<br>0.2695             | R <sub>1</sub> = 0.0670, wR <sub>2</sub> = 0.1692                |
| Largest diff. peak/hole / e Å <sup>-3</sup> | 0.34/-0.38                                                       | 0.36/-0.21                                                       |
| Flack parameter                             | 0.1(10)                                                          | 0.8(6)                                                           |

[Re<sub>2</sub>(5a)(CO)<sub>6</sub>Cl<sub>2</sub>]

| Identification code | d1-[Re <sub>2</sub> (5a)(CO) <sub>6</sub> Cl <sub>2</sub> ] | d2-[Re <sub>2</sub> (5a)(CO) <sub>6</sub> Cl <sub>2</sub> ] |
|---------------------|-------------------------------------------------------------|-------------------------------------------------------------|
|---------------------|-------------------------------------------------------------|-------------------------------------------------------------|

|                                             |                                                                                               |                                                                                               |
|---------------------------------------------|-----------------------------------------------------------------------------------------------|-----------------------------------------------------------------------------------------------|
| CCDC number                                 | 2310573                                                                                       | 2310577                                                                                       |
| Empirical formula                           | C <sub>41</sub> Cl <sub>4</sub> H <sub>36</sub> N <sub>4</sub> O <sub>6</sub> Re <sub>2</sub> | C <sub>40</sub> H <sub>34</sub> Cl <sub>2</sub> N <sub>4</sub> O <sub>6</sub> Re <sub>2</sub> |
| Formula weight                              | 1194.94                                                                                       | 1110.01                                                                                       |
| Temperature/K                               | 200(2)                                                                                        | 200(2)                                                                                        |
| Crystal system                              | orthorhombic                                                                                  | monoclinic                                                                                    |
| Space group                                 | P2 <sub>1</sub> 2 <sub>1</sub> 2 <sub>1</sub>                                                 | P2 <sub>1</sub>                                                                               |
| a/Å                                         | 13.6887(2)                                                                                    | 9.60080(10)                                                                                   |
| b/Å                                         | 15.7230(3)                                                                                    | 16.6361(2)                                                                                    |
| c/Å                                         | 20.3145(3)                                                                                    | 14.24960(10)                                                                                  |
| α/°                                         | 90                                                                                            | 90                                                                                            |
| β/°                                         | 90                                                                                            | 102.6440(10)                                                                                  |
| γ/°                                         | 90                                                                                            | 90                                                                                            |
| Volume/Å <sup>3</sup>                       | 4372.24(12)                                                                                   | 2220.75(4)                                                                                    |
| Z                                           | 4                                                                                             | 2                                                                                             |
| ρ <sub>calc</sub> /cm <sup>3</sup>          | 1.815                                                                                         | 1.660                                                                                         |
| μ/mm <sup>-1</sup>                          | 13.319                                                                                        | 11.979                                                                                        |
| F(000)                                      | 2304.0                                                                                        | 1068.0                                                                                        |
| Crystal size/mm <sup>3</sup>                | 0.21 × 0.12 × 0.06                                                                            | 0.3 × 0.2 × 0.1                                                                               |
| Radiation                                   | Cu Kα (λ = 1.54186)                                                                           | Cu Kα (λ = 1.54186)                                                                           |
| 2θ range for data collection/°              | 7.11 to 135.072                                                                               | 8.288 to 130.208                                                                              |
| Index ranges                                | -5 ≤ h ≤ 15, -18 ≤ k ≤ 18, -23 ≤ l ≤ 23                                                       | -7 ≤ h ≤ 11, -18 ≤ k ≤ 19, -15 ≤ l ≤ 16                                                       |
| Reflections collected                       | 53947                                                                                         | 79563                                                                                         |
| Independent reflections                     | 7515 [R <sub>int</sub> = 0.0550, R <sub>sigma</sub> = 0.0293]                                 | 7200 [R <sub>int</sub> = 0.0425, R <sub>sigma</sub> = 0.0133]                                 |
| Data/restraints/parameters                  | 7515/0/492                                                                                    | 7200/1/492                                                                                    |
| Goodness-of-fit on F <sup>2</sup>           | 1.081                                                                                         | 1.075                                                                                         |
| Final R indexes [I ≥ 2σ(I)]                 | R <sub>1</sub> = 0.0381, wR <sub>2</sub> = 0.0914                                             | R <sub>1</sub> = 0.0339, wR <sub>2</sub> = 0.0887                                             |
| Final R indexes [all data]                  | R <sub>1</sub> = 0.0438, wR <sub>2</sub> = 0.0947                                             | R <sub>1</sub> = 0.0339, wR <sub>2</sub> = 0.0887                                             |
| Largest diff. peak/hole / e Å <sup>-3</sup> | 1.45/-0.46                                                                                    | 1.00/-0.70                                                                                    |
| Flack parameter                             | 0.05(2)                                                                                       | 0.056(16)                                                                                     |

[Re<sub>2</sub>(**5b**)(CO)<sub>6</sub>Cl<sub>2</sub>]

| Identification code                         | d1-[Re <sub>2</sub> ( <b>5b</b> )(CO) <sub>6</sub> Cl <sub>2</sub> ]                          | d2-[Re <sub>2</sub> ( <b>5b</b> )(CO) <sub>6</sub> Cl <sub>2</sub> ]                          |
|---------------------------------------------|-----------------------------------------------------------------------------------------------|-----------------------------------------------------------------------------------------------|
| CCDC number                                 | 2310574                                                                                       | 2310578                                                                                       |
| Empirical formula                           | C <sub>40</sub> H <sub>34</sub> Cl <sub>2</sub> N <sub>4</sub> O <sub>6</sub> Re <sub>2</sub> | C <sub>40</sub> H <sub>34</sub> Cl <sub>2</sub> N <sub>4</sub> O <sub>6</sub> Re <sub>2</sub> |
| Formula weight                              | 1110.01                                                                                       | 1110.01                                                                                       |
| Temperature/K                               | 250                                                                                           | 250                                                                                           |
| Crystal system                              | orthorhombic                                                                                  | monoclinic                                                                                    |
| Space group                                 | P2 <sub>1</sub> 2 <sub>1</sub> 2 <sub>1</sub>                                                 | P2 <sub>1</sub>                                                                               |
| a/Å                                         | 13.8365(2)                                                                                    | 9.62135(21)                                                                                   |
| b/Å                                         | 16.5716(4)                                                                                    | 16.6058(5)                                                                                    |
| c/Å                                         | 17.2135(3)                                                                                    | 14.2479(4)                                                                                    |
| α/°                                         | 90.00                                                                                         | 90.00                                                                                         |
| β/°                                         | 90.00                                                                                         | 102.679(2)                                                                                    |
| γ/°                                         | 90.00                                                                                         | 90.00                                                                                         |
| Volume/Å <sup>3</sup>                       | 3946.93(13)                                                                                   | 2220.87(10)                                                                                   |
| Z                                           | 4                                                                                             | 2                                                                                             |
| ρ <sub>calc</sub> /cm <sup>3</sup>          | 1.868                                                                                         | 1.660                                                                                         |
| μ/mm <sup>-1</sup>                          | 3.390                                                                                         | 3.012                                                                                         |
| F(000)                                      | 2136.0                                                                                        | 1068.0                                                                                        |
| Crystal size/mm <sup>3</sup>                | 0.56 × 0.363 × 0.19                                                                           | 0.44 × 0.3 × 0.16                                                                             |
| Radiation                                   | Ag Kα (λ = 0.56083)                                                                           | Ag Kα (λ = 0.56083)                                                                           |
| 2θ range for data collection/°              | 4.522 to 53.134                                                                               | 4.51 to 53.314                                                                                |
| Index ranges                                | -21 ≤ h ≤ 21, -26 ≤ k ≤ 25, -27 ≤ l ≤ 26                                                      | -13 ≤ h ≤ 15, -26 ≤ k ≤ 25, -21 ≤ l ≤ 22                                                      |
| Reflections collected                       | 73000                                                                                         | 45516                                                                                         |
| Independent reflections                     | 14577 [R <sub>int</sub> = 0.0911, R <sub>sigma</sub> = 0.0575]                                | 15275 [R <sub>int</sub> = 0.0583, R <sub>sigma</sub> = 0.0488]                                |
| Data/restraints/parameters                  | 14577/31/491                                                                                  | 15275/1/491                                                                                   |
| Goodness-of-fit on F <sup>2</sup>           | 1.024                                                                                         | 0.957                                                                                         |
| Final R indexes [I >= 2σ (I)]               | R <sub>1</sub> = 0.0362, wR <sub>2</sub> = 0.0737                                             | R <sub>1</sub> = 0.0319, wR <sub>2</sub> = 0.0672                                             |
| Final R indexes [all data]                  | R <sub>1</sub> = 0.0504, wR <sub>2</sub> = 0.0768                                             | R <sub>1</sub> = 0.0403, wR <sub>2</sub> = 0.0692                                             |
| Largest diff. peak/hole / e Å <sup>-3</sup> | 1.32/-1.16                                                                                    | 0.76/-0.85                                                                                    |
| Flack parameter                             | 0.002(8)                                                                                      | 0.017(8)                                                                                      |

[Re<sub>2</sub>(**6a**)(CO)<sub>6</sub>Cl<sub>2</sub>]

| Identification code                         | d1-[Re <sub>2</sub> ( <b>6a</b> )(CO) <sub>6</sub> Cl <sub>2</sub> ]                          | d2-[Re <sub>2</sub> ( <b>6a</b> )(CO) <sub>6</sub> Cl <sub>2</sub> ]                           |
|---------------------------------------------|-----------------------------------------------------------------------------------------------|------------------------------------------------------------------------------------------------|
| CCDC number                                 | 2310575                                                                                       | 2310579                                                                                        |
| Empirical formula                           | C <sub>40</sub> H <sub>34</sub> Cl <sub>2</sub> N <sub>4</sub> O <sub>6</sub> Re <sub>2</sub> | C <sub>80</sub> H <sub>68</sub> Cl <sub>4</sub> N <sub>8</sub> O <sub>12</sub> Re <sub>4</sub> |
| Formula weight                              | 1110.01                                                                                       | 2220.02                                                                                        |
| Temperature/K                               | 200(2)                                                                                        | 200(2)                                                                                         |
| Crystal system                              | orthorhombic                                                                                  | triclinic                                                                                      |
| Space group                                 | C222 <sub>1</sub>                                                                             | P1                                                                                             |
| a/Å                                         | 19.7136(5)                                                                                    | 12.0572(2)                                                                                     |
| b/Å                                         | 25.7034(7)                                                                                    | 14.1674(2)                                                                                     |
| c/Å                                         | 8.5965(2)                                                                                     | 14.4880(3)                                                                                     |
| α/°                                         | 90                                                                                            | 115.3320(10)                                                                                   |
| β/°                                         | 90                                                                                            | 94.9130(10)                                                                                    |
| γ/°                                         | 90                                                                                            | 93.3450(10)                                                                                    |
| Volume/Å <sup>3</sup>                       | 4355.90(19)                                                                                   | 2216.20(7)                                                                                     |
| Z                                           | 4                                                                                             | 1                                                                                              |
| ρ <sub>calc</sub> /cm <sup>3</sup>          | 1.693                                                                                         | 1.663                                                                                          |
| μ/mm <sup>-1</sup>                          | 12.215                                                                                        | 12.004                                                                                         |
| F(000)                                      | 2136.0                                                                                        | 1068.0                                                                                         |
| Crystal size/mm <sup>3</sup>                | 0.18 × 0.133 × 0.08                                                                           | 0.06 × 0.05 × 0.03                                                                             |
| Radiation                                   | Cu Kα (λ = 1.54186)                                                                           | Cu Kα (λ = 1.54186)                                                                            |
| 2θ range for data collection/°              | 8.972 to 134.89                                                                               | 7.306 to 135.708                                                                               |
| Index ranges                                | -14 ≤ h ≤ 23, -28 ≤ k ≤ 30, -8 ≤ l ≤ 10                                                       | -14 ≤ h ≤ 14, -16 ≤ k ≤ 14, -17 ≤ l ≤ 16                                                       |
| Reflections collected                       | 14971                                                                                         | 9052                                                                                           |
| Independent reflections                     | 3789 [R <sub>int</sub> = 0.0250, R <sub>sigma</sub> = 0.0172]                                 | 9052 [R <sub>int</sub> = ?, R <sub>sigma</sub> = 0.0263]                                       |
| Data/restraints/parameters                  | 3789/0/246                                                                                    | 9052/4/814                                                                                     |
| Goodness-of-fit on F <sup>2</sup>           | 1.049                                                                                         | 1.109                                                                                          |
| Final R indexes [I >= 2σ (I)]               | R <sub>1</sub> = 0.0398, wR <sub>2</sub> = 0.1087                                             | R <sub>1</sub> = 0.0479, wR <sub>2</sub> = 0.1391                                              |
| Final R indexes [all data]                  | R <sub>1</sub> = 0.0400, wR <sub>2</sub> = 0.1089                                             | R <sub>1</sub> = 0.0493, wR <sub>2</sub> = 0.1401                                              |
| Largest diff. peak/hole / e Å <sup>-3</sup> | 1.72/-1.22                                                                                    | 2.76/-2.19                                                                                     |
| Flack parameter                             | 0.03(3)                                                                                       | -0.008(12)                                                                                     |

[Re<sub>2</sub>(**6b**)(CO)<sub>6</sub>Cl<sub>2</sub>]

| Identification code                         | d1-[Re <sub>2</sub> ( <b>6b</b> )(CO) <sub>6</sub> Cl <sub>2</sub> ]                          | d2-[Re <sub>2</sub> ( <b>6b</b> )(CO) <sub>6</sub> Cl <sub>2</sub> ]                          |
|---------------------------------------------|-----------------------------------------------------------------------------------------------|-----------------------------------------------------------------------------------------------|
| CCDC number                                 | 2310576                                                                                       | 2310580                                                                                       |
| Empirical formula                           | C <sub>40</sub> H <sub>34</sub> Cl <sub>2</sub> N <sub>4</sub> O <sub>6</sub> Re <sub>2</sub> | C <sub>44</sub> H <sub>46</sub> Cl <sub>2</sub> N <sub>4</sub> O <sub>8</sub> Re <sub>2</sub> |
| Formula weight                              | 1110.01                                                                                       | 1202.15                                                                                       |
| Temperature/K                               | 250                                                                                           | 250(2)                                                                                        |
| Crystal system                              | orthorhombic                                                                                  | triclinic                                                                                     |
| Space group                                 | C222 <sub>1</sub>                                                                             | P1                                                                                            |
| a/Å                                         | 19.8460(3)                                                                                    | 12.0797(3)                                                                                    |
| b/Å                                         | 25.9024(4)                                                                                    | 14.3295(3)                                                                                    |
| c/Å                                         | 8.63570(10)                                                                                   | 14.5093(3)                                                                                    |
| α/°                                         | 90.00                                                                                         | 116.153(2)                                                                                    |
| β/°                                         | 90.00                                                                                         | 95.311(2)                                                                                     |
| γ/°                                         | 90.00                                                                                         | 91.952(2)                                                                                     |
| Volume/Å <sup>3</sup>                       | 4439.26(11)                                                                                   | 2236.81(9)                                                                                    |
| Z                                           | 4                                                                                             | 2                                                                                             |
| ρ <sub>calc</sub> /cm <sup>3</sup>          | 1.661                                                                                         | 1.785                                                                                         |
| μ/mm <sup>-1</sup>                          | 3.014                                                                                         | 11.980                                                                                        |
| F(000)                                      | 2136.0                                                                                        | 1172.0                                                                                        |
| Crystal size/mm <sup>3</sup>                | 0.45 × 0.27 × 0.14                                                                            | 0.11 × 0.093 × 0.07                                                                           |
| Radiation                                   | AgKα (λ = 0.56083)                                                                            | Cu Kα (λ = 1.54186)                                                                           |
| 2θ range for data collection/°              | 4.474 to 53.106                                                                               | 10.158 to 138.264                                                                             |
| Index ranges                                | -30 ≤ h ≤ 27, -41 ≤ k ≤ 35, -13 ≤ l ≤ 13                                                      | -14 ≤ h ≤ 10, -16 ≤ k ≤ 17, -17 ≤ l ≤ 17                                                      |
| Reflections collected                       | 70371                                                                                         | 64439                                                                                         |
| Independent reflections                     | 8594 [R <sub>int</sub> = 0.0714, R <sub>sigma</sub> = 0.0417]                                 | 11433 [R <sub>int</sub> = 0.0525, R <sub>sigma</sub> = 0.0333]                                |
| Data/restraints/parameters                  | 8594/0/246                                                                                    | 11433/168/794                                                                                 |
| Goodness-of-fit on F <sup>2</sup>           | 1.010                                                                                         | 1.077                                                                                         |
| Final R indexes [I >= 2σ (I)]               | R <sub>1</sub> = 0.0354, wR <sub>2</sub> = 0.0897                                             | R <sub>1</sub> = 0.0666, wR <sub>2</sub> = 0.1903                                             |
| Final R indexes [all data]                  | R <sub>1</sub> = 0.0513, wR <sub>2</sub> = 0.0938                                             | R <sub>1</sub> = 0.0697, wR <sub>2</sub> = 0.1954                                             |
| Largest diff. peak/hole / e Å <sup>-3</sup> | 1.84/-0.56                                                                                    | 3.04/-1.53                                                                                    |
| Flack parameter                             | -0.013(11)                                                                                    | 0.17(2)                                                                                       |
